# Supplementary material
Source: publisher figshare collection journal article supplement (https://acs.figshare.com/ndownloader/files/13274042)
Supplement: Supplementary file 1 [file 13274042]

## **Supporting Information II**

### **Synthesis and Cytotoxic and Antiviral Profiling of Pyrrolo- and Furo-fused 7-Deazapurine Ribonucleosides**

Anna Tokarenko, Barbora Lišková, Sabina Smoleň, Natálie Táborská, Michal Tichý, Soňa Gurská, Pavla Perlíková, Ivo Frydrych, Eva Tloušťová, Pawel Znojek, Helena Mertlíková-Kaiserová, Lenka Poštová Slavětínská, Radek Pohl, Blanka Klepetářová, Noor-Ul-Ain Khalid, Yiqian Wenren, Rebecca R. Laposa, Petr Džubák, Marián Hajdúch, Michal Hocek

#### **Contents:**

Copies of NMR spectra

## Copies of NMR spectra

### NMR spectra of 3-iodo-1-methyl-1*H*-pyrrole

TOKARENKO ATH-int  
1H NMR in CDCl<sub>3</sub>  
09-10-15 RA  
\*\*\*\*\*

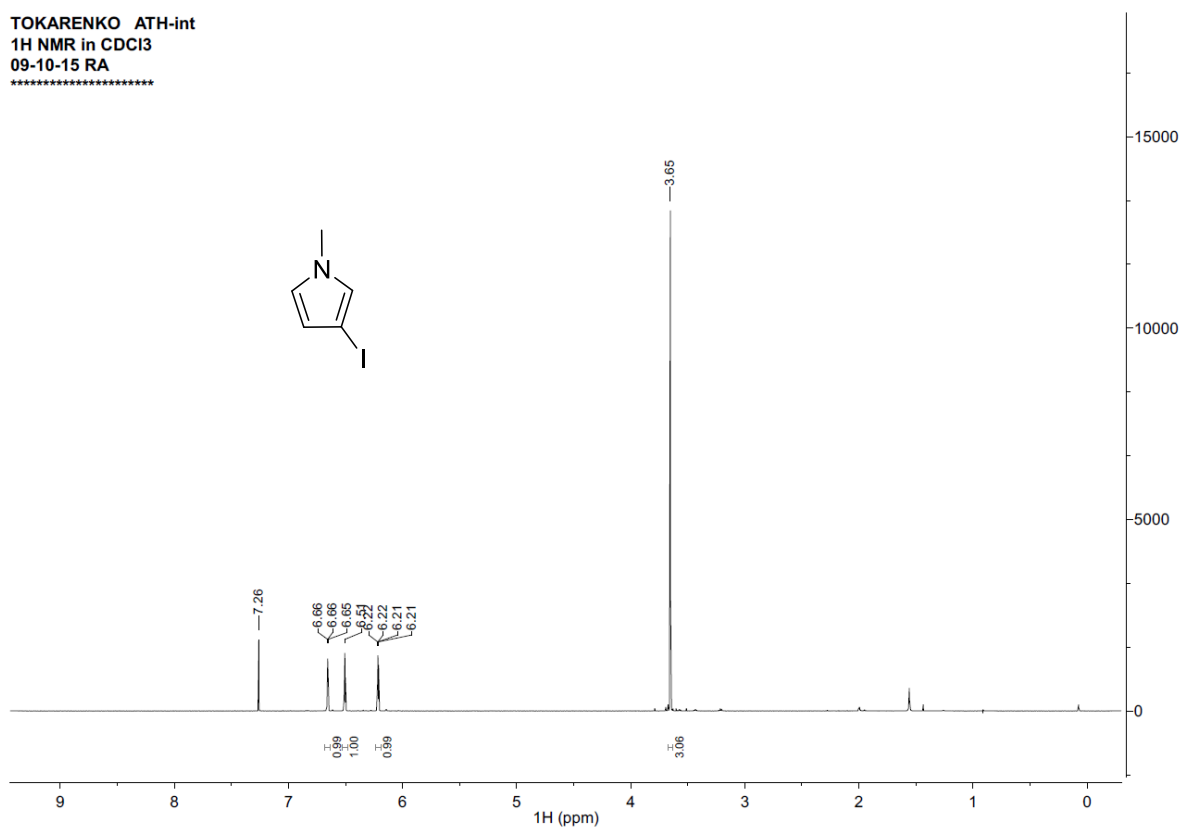

TOKARENKO ATH-int  
APT in CDCl<sub>3</sub>  
09-10-15 RA  
\*\*\*\*\*

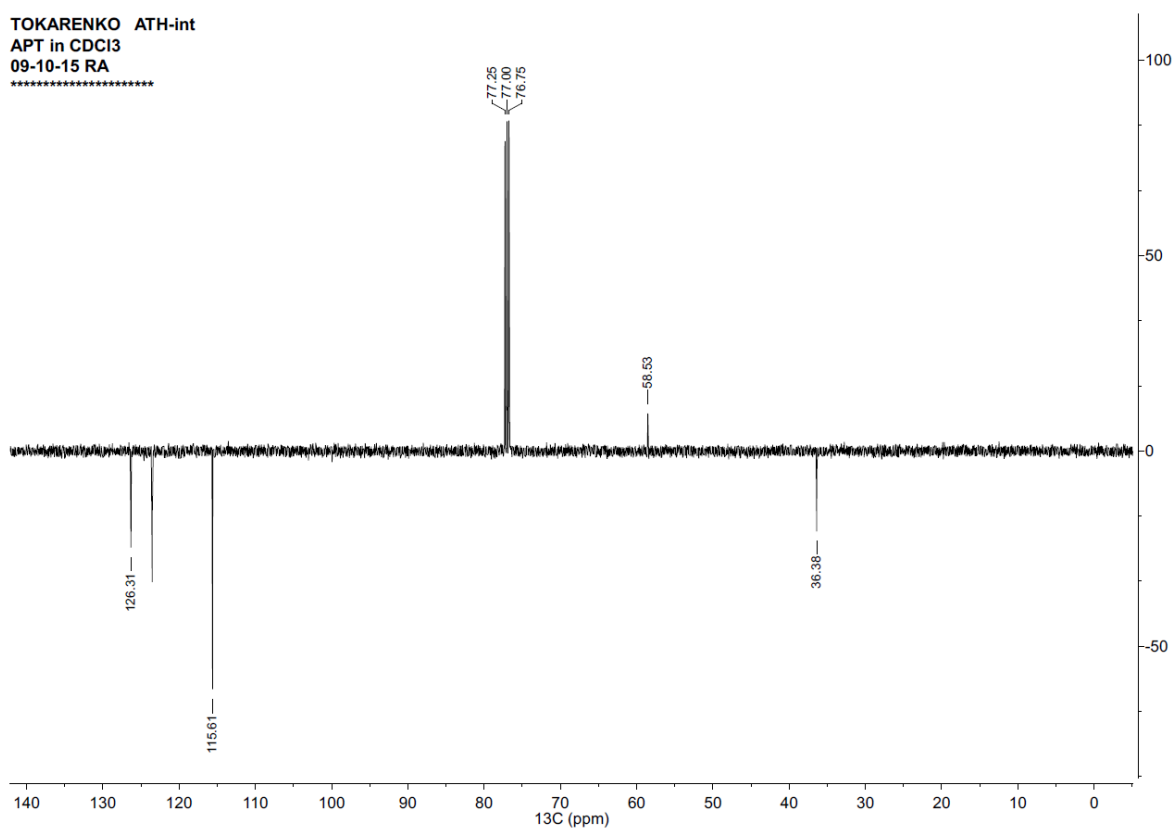

# NMR spectra of compound 7

TOKARENKO ATH-389\_fr17-27

<sup>1</sup>H NMR in DMSO-d<sub>6</sub>

02-09-15 RA

\*\*\*\*\*

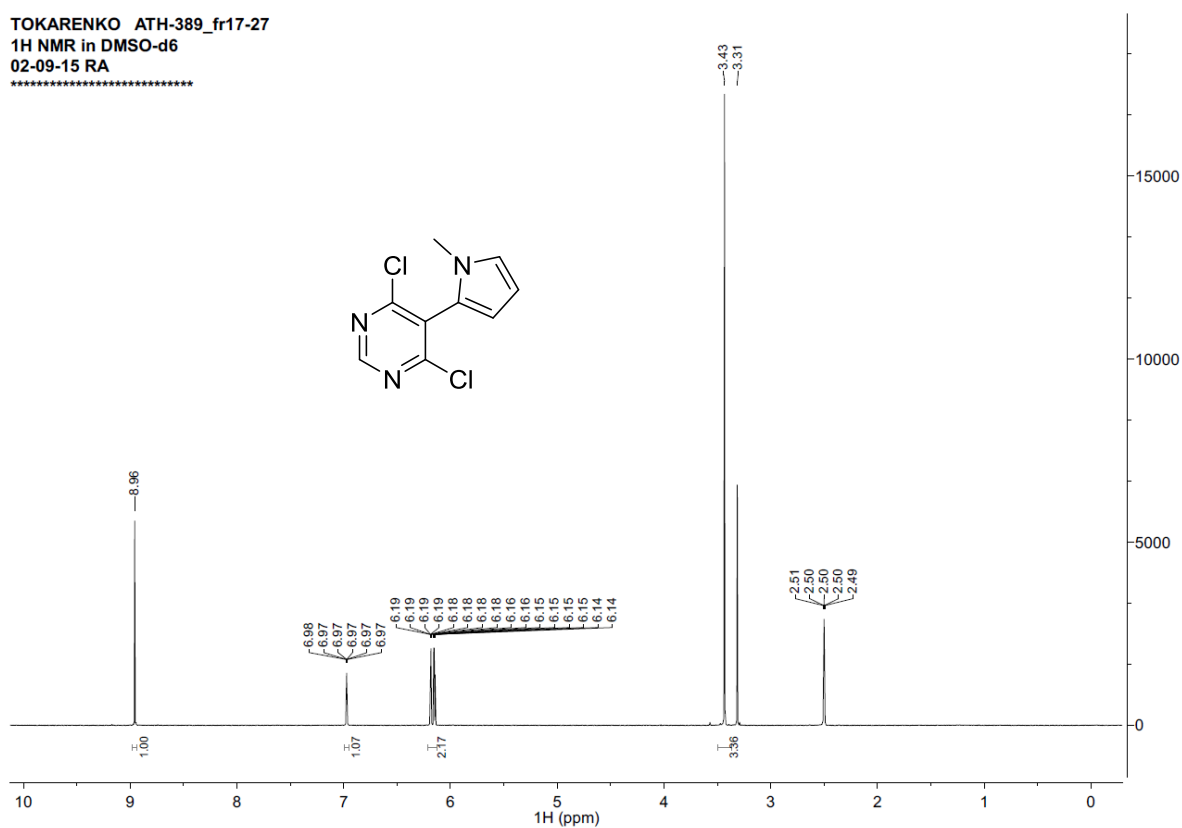

TOKARENKO ATH-389\_fr17-27

APT in DMSO-d<sub>6</sub>

02-09-15 RA

\*\*\*\*\*

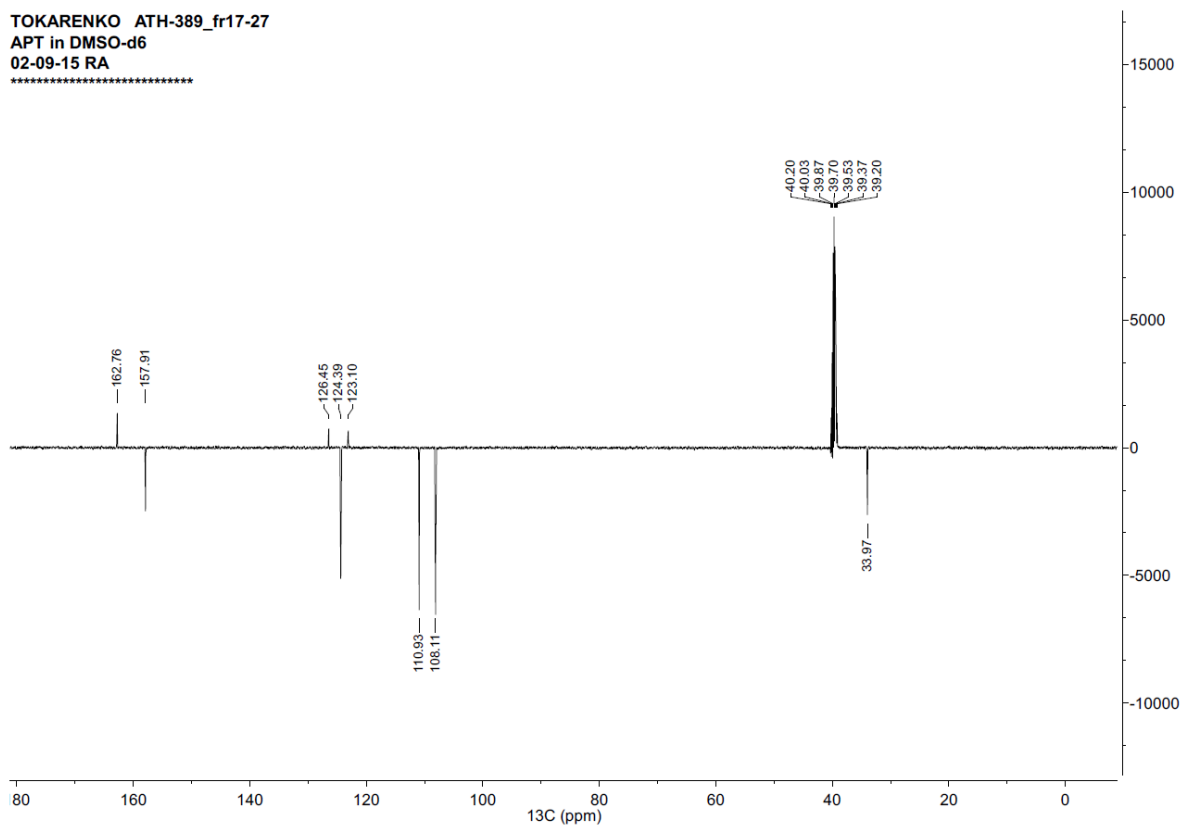

# NMR spectra of compound **8**

TOKARENKO ATH-556  
 1H NMR in CDCl<sub>3</sub>  
 11-08-17 RA  
 \*\*\*\*\*

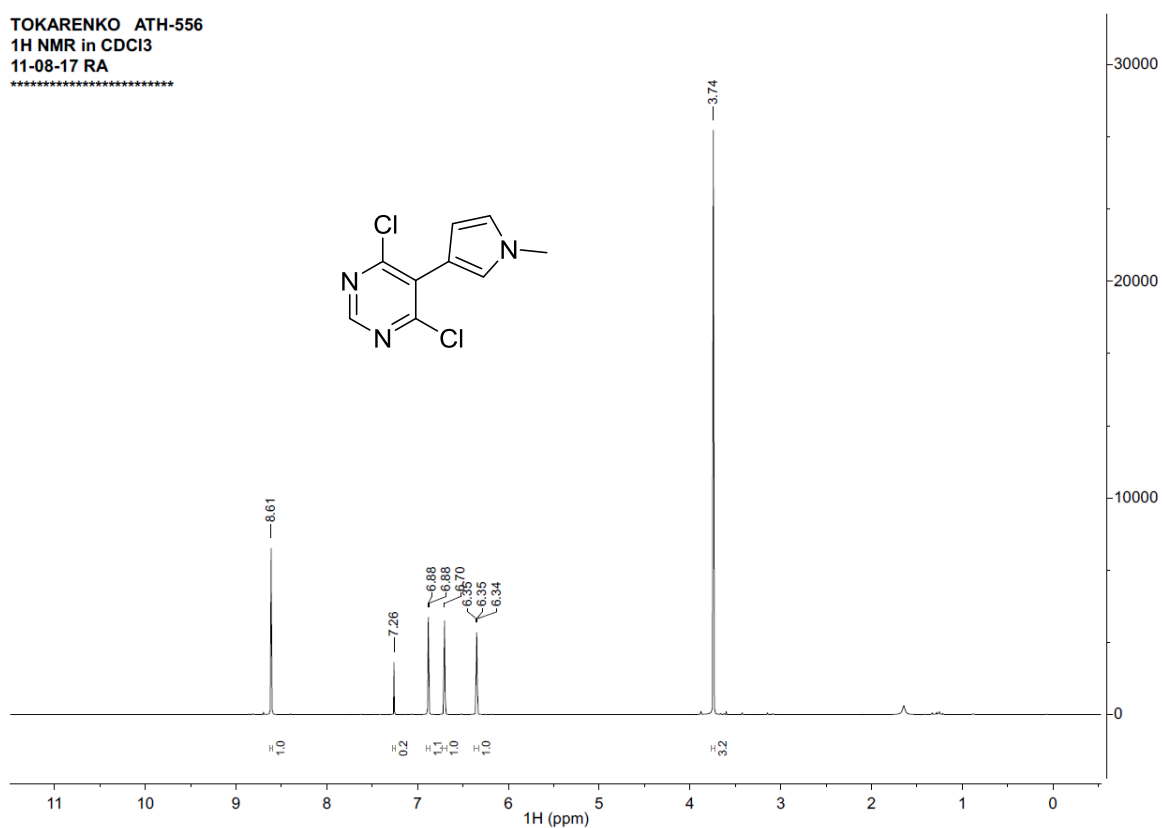

TOKARENKO ATH-556  
 APT in CDCl<sub>3</sub>  
 11-08-17 RA  
 \*\*\*\*\*

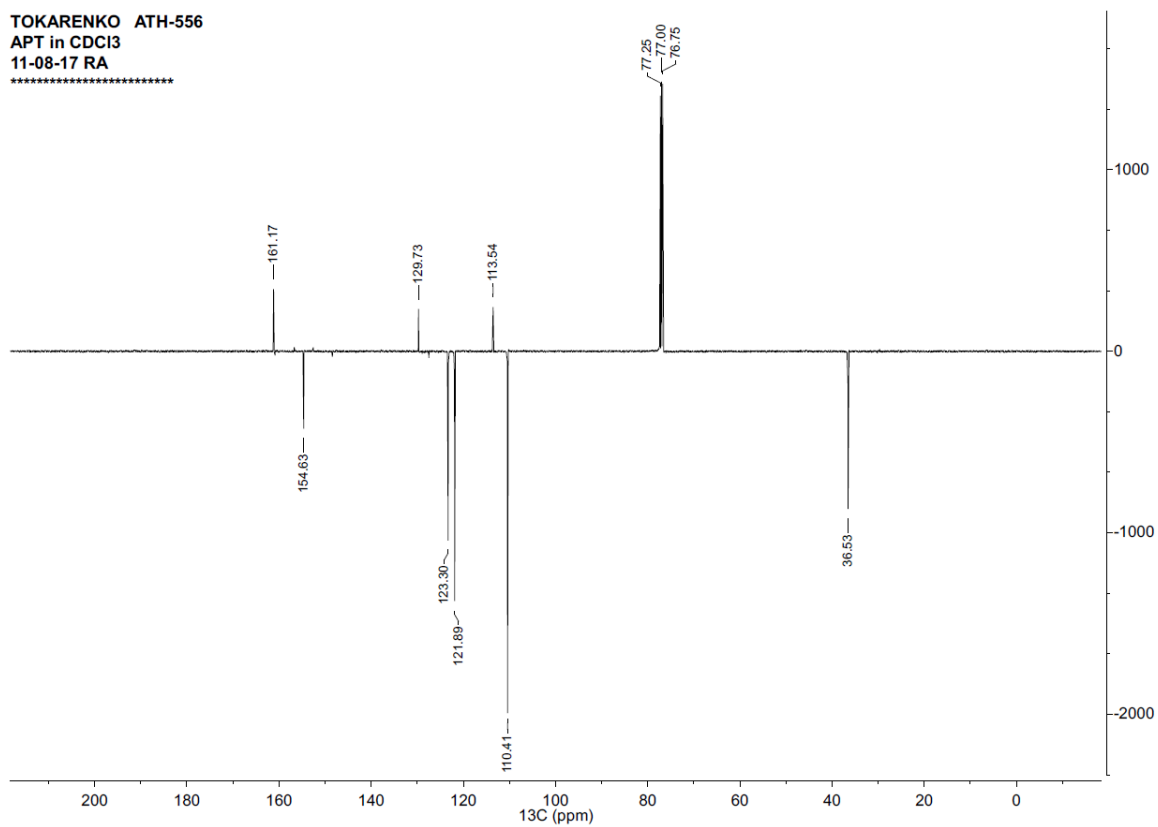

# NMR spectra of compound **9**

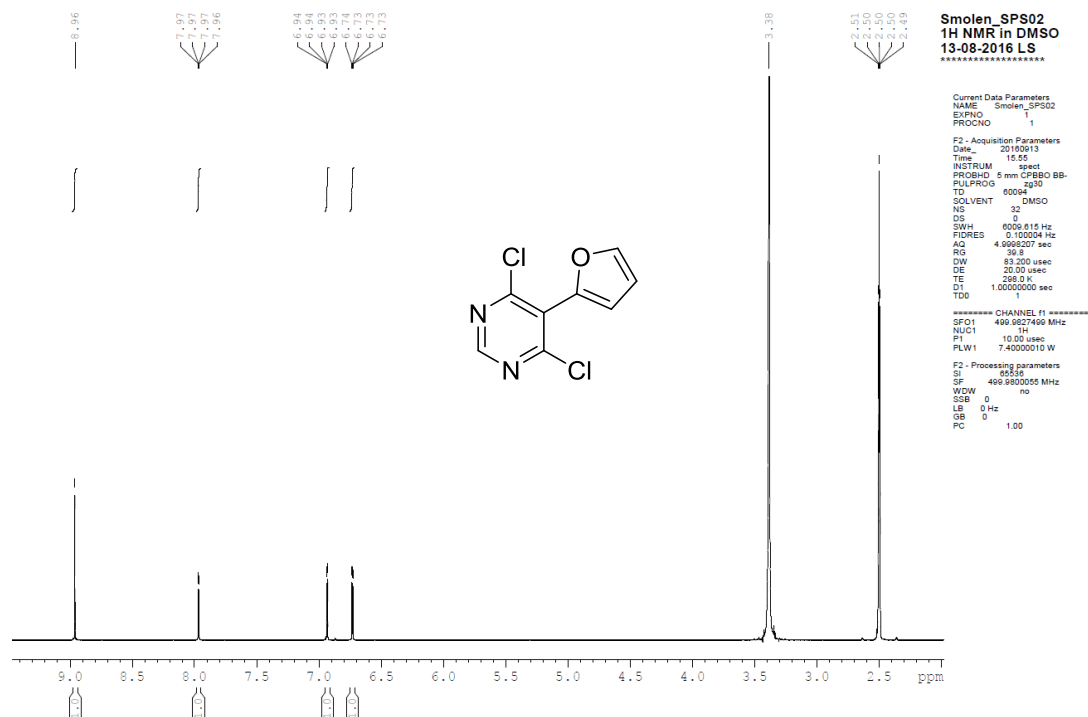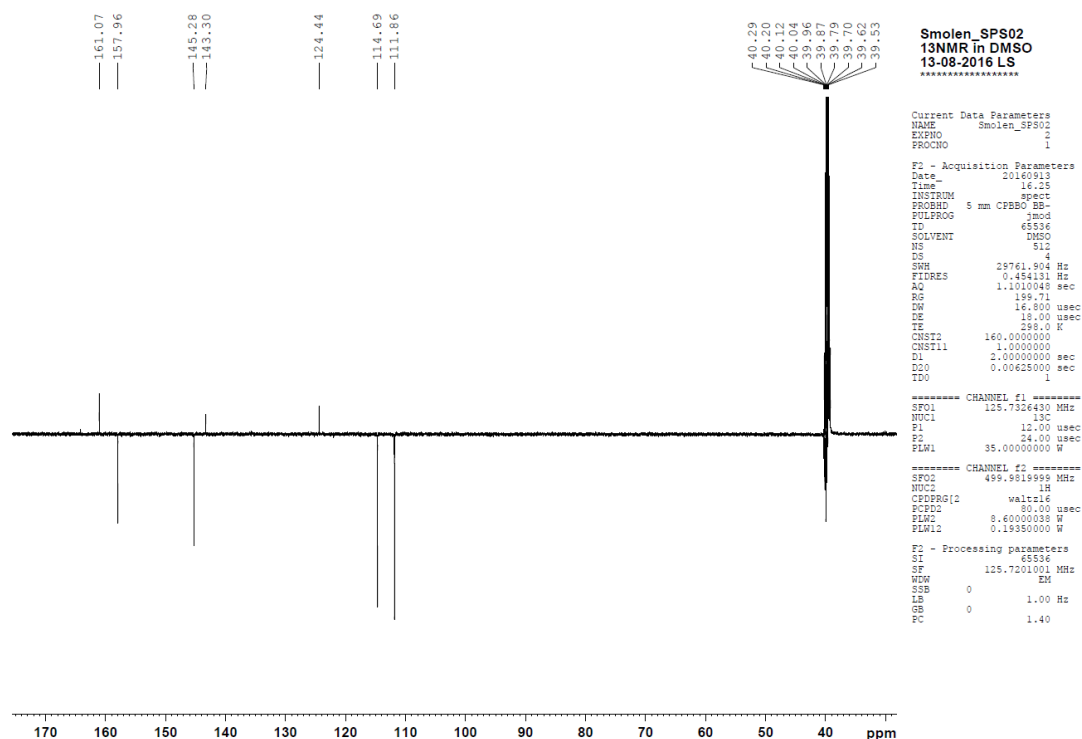

# NMR spectra of compound **10**

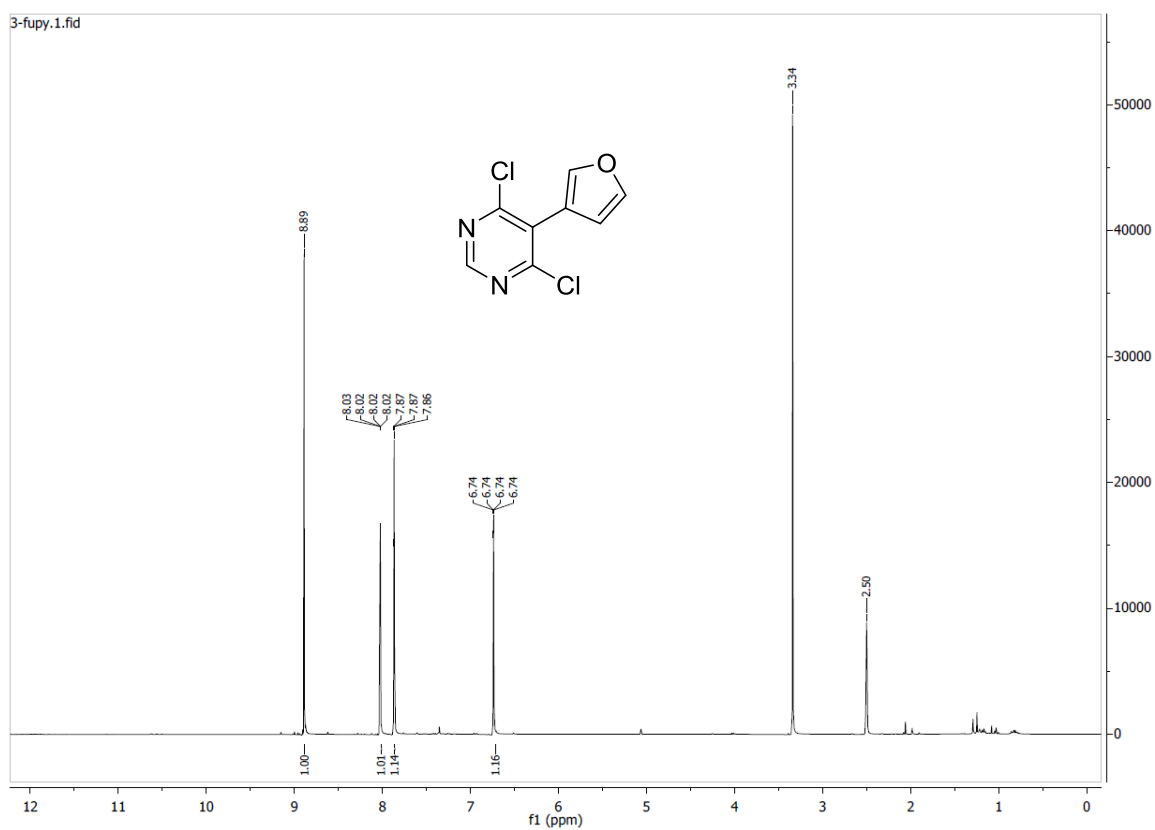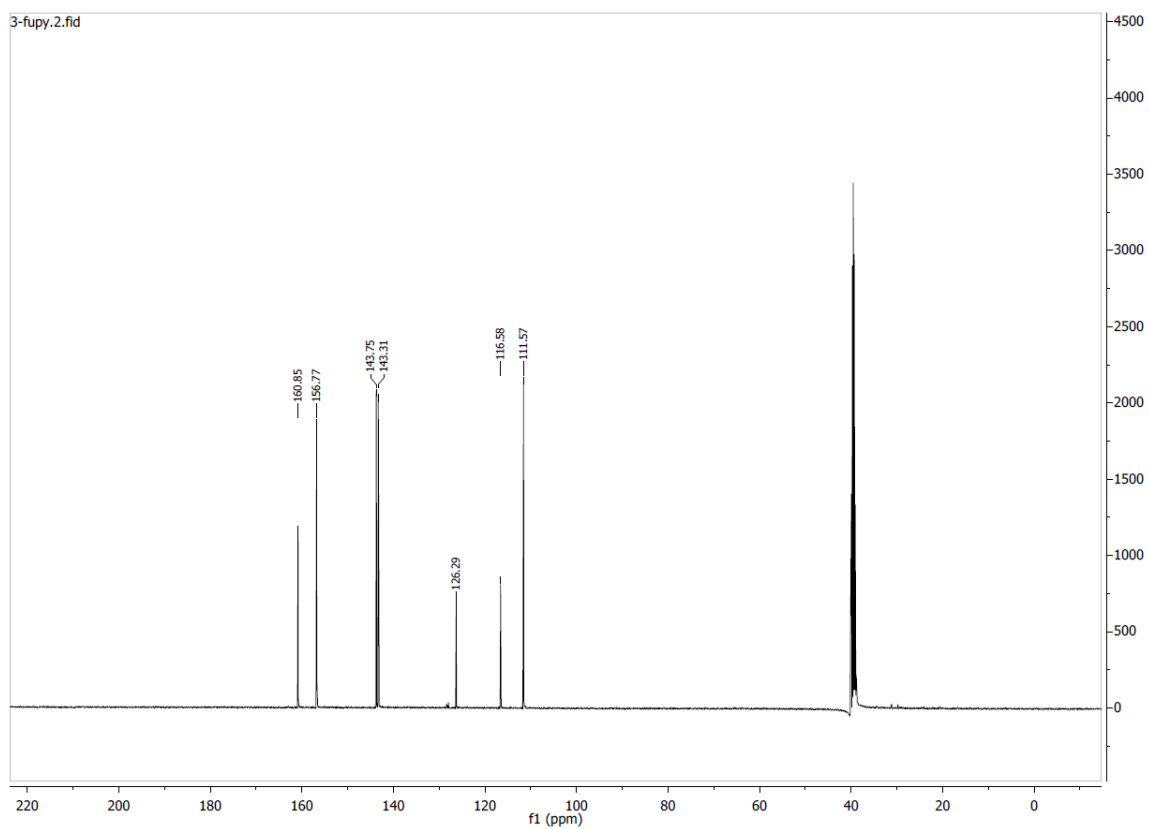

# NMR spectra of compound **11** (**11t**)

TOKARENKO ATH-405  
 1H NMR in CDCl<sub>3</sub>  
 21-10-15 RA  
 \*\*\*\*\*

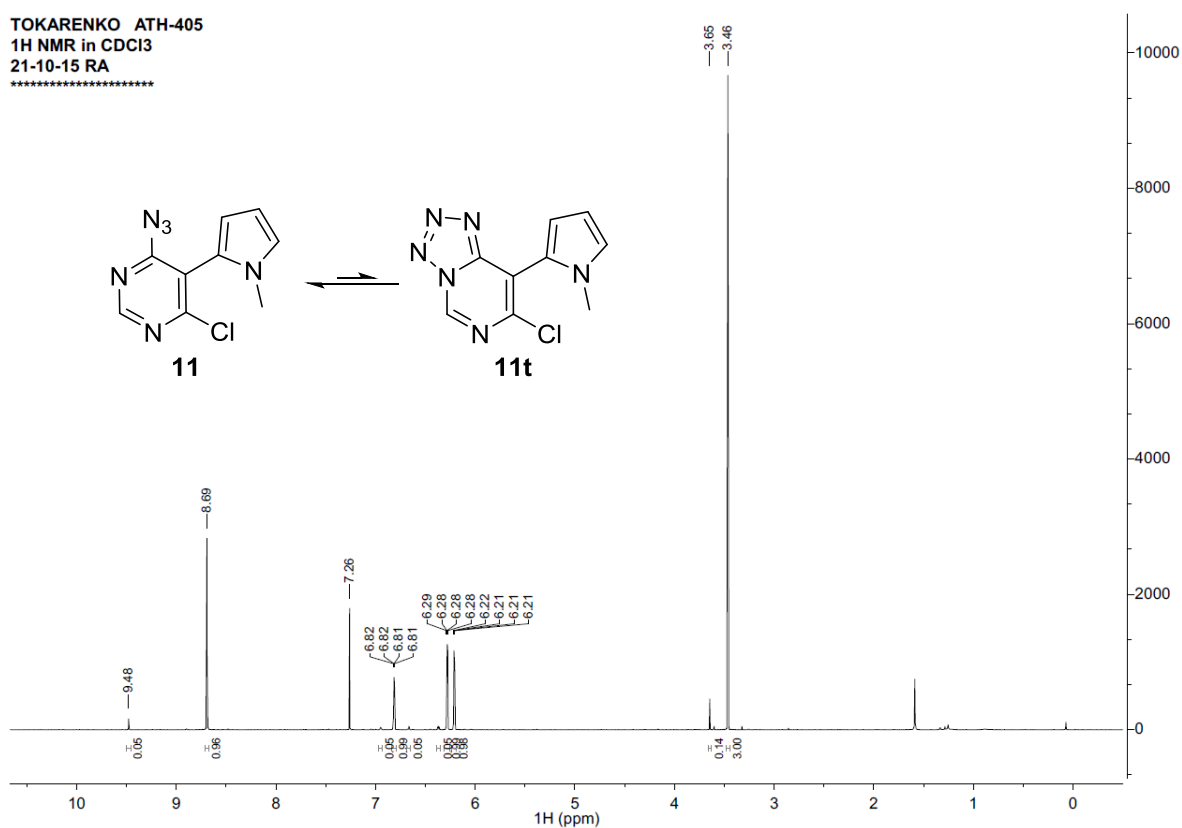

TOKARENKO ATH-405  
 APT in CDCl<sub>3</sub>  
 21-10-15 RA  
 \*\*\*\*\*

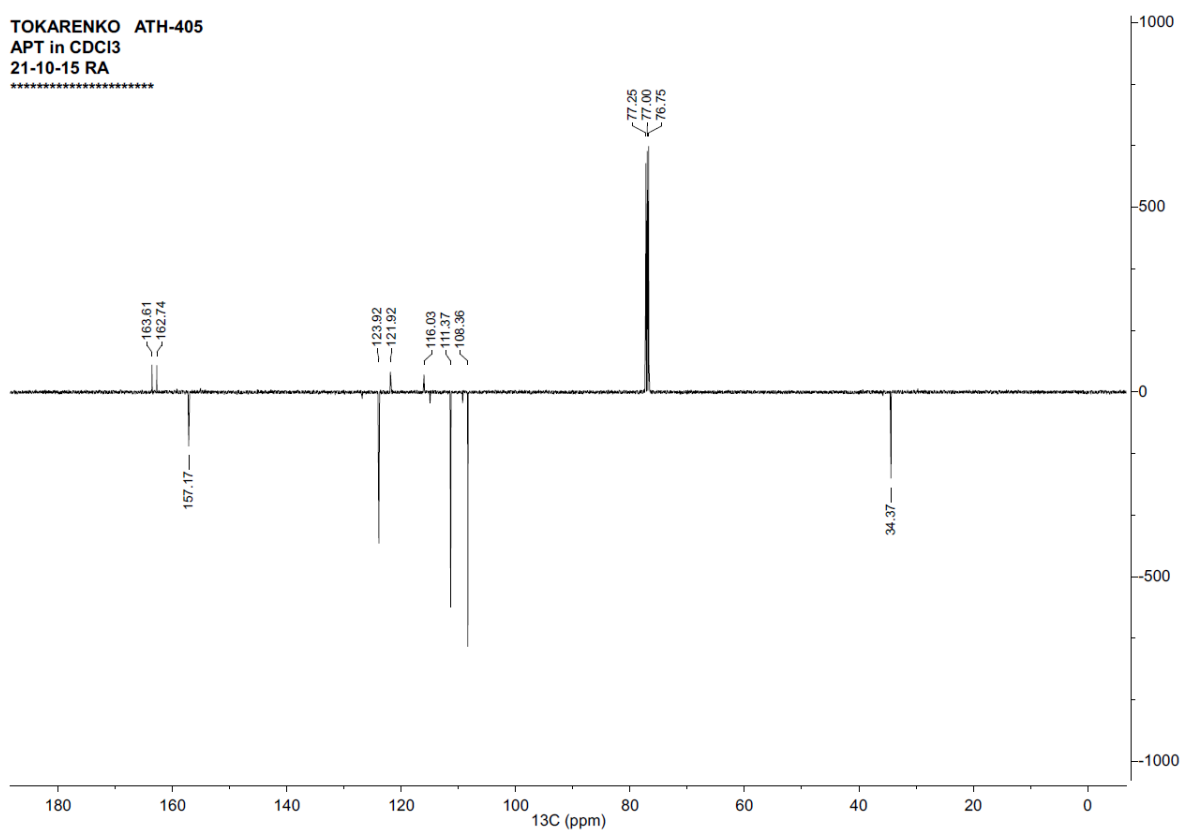

TOKARENKO ATH-405  
 1H NMR in DMSO  
 22-10-15 RA  
 \*\*\*\*\*

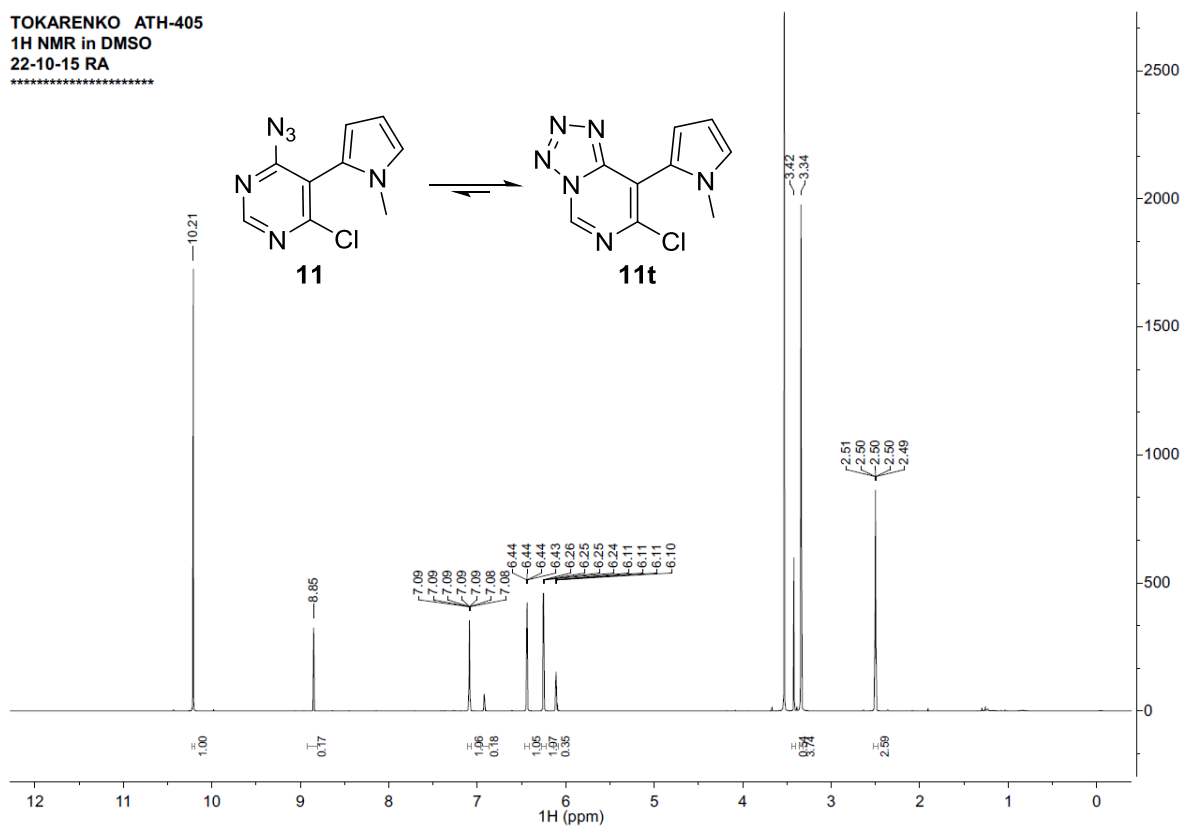

TOKARENKO ATH-405  
 APT in DMSO-d6  
 22-10-15 RA  
 \*\*\*\*\*

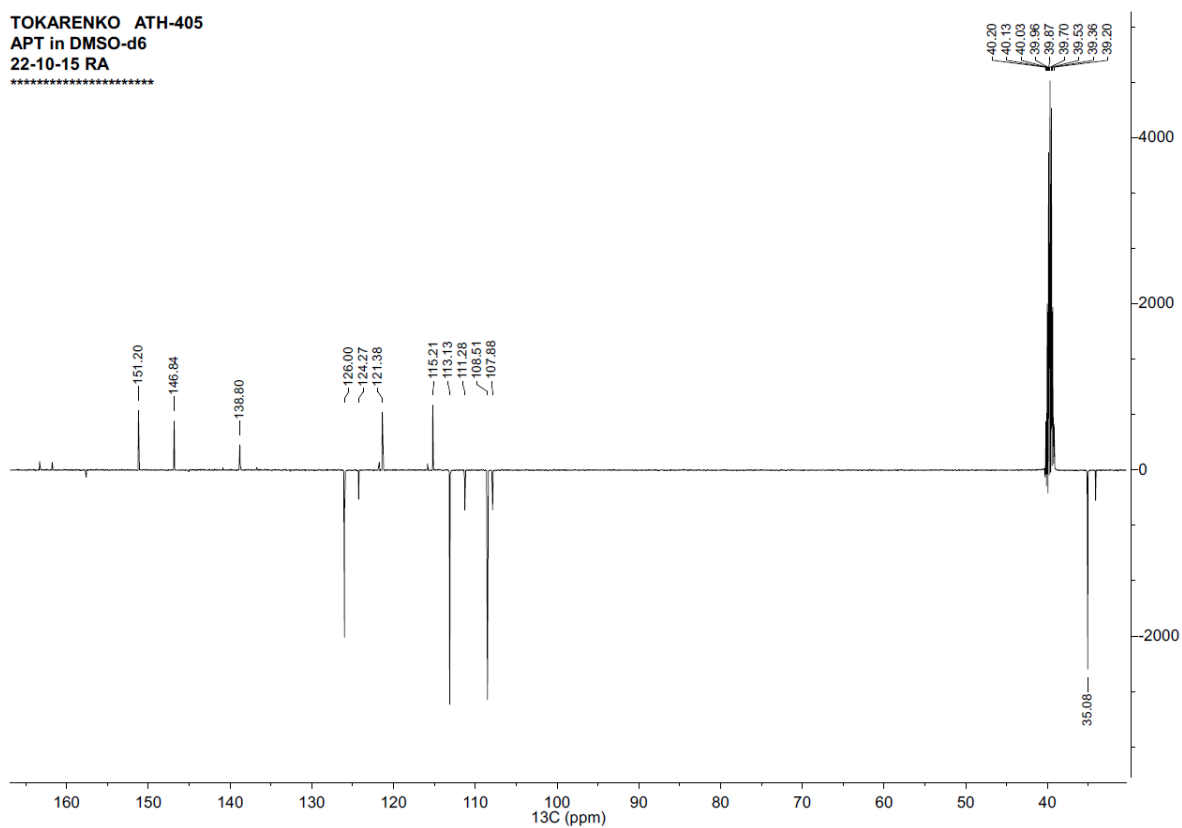



# NMR spectra of compound **12** (**12t**)

TOKARENKO ATH-428  
1H NMR in CDCl<sub>3</sub>  
08-02-16 RA  
\*\*\*\*\*

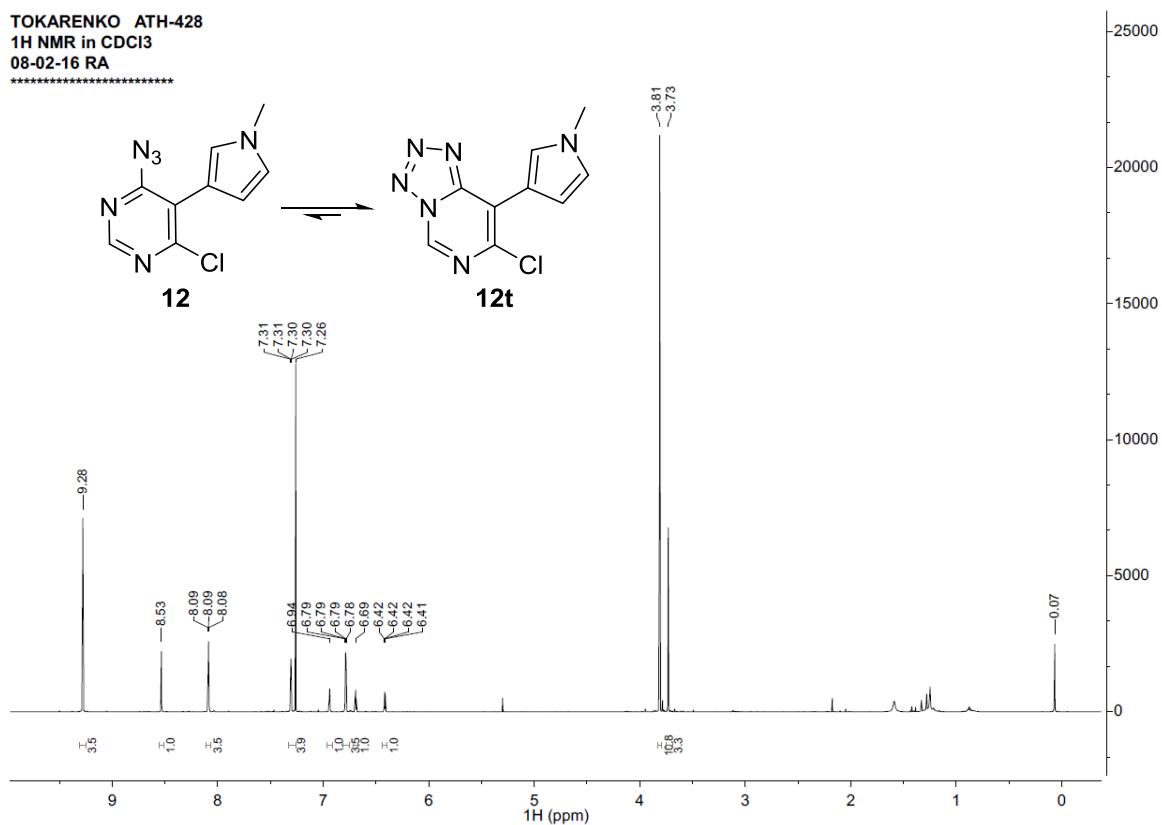

TOKARENKO ATH-428  
APT in CDCl<sub>3</sub>  
08-02-16 RA  
\*\*\*\*\*

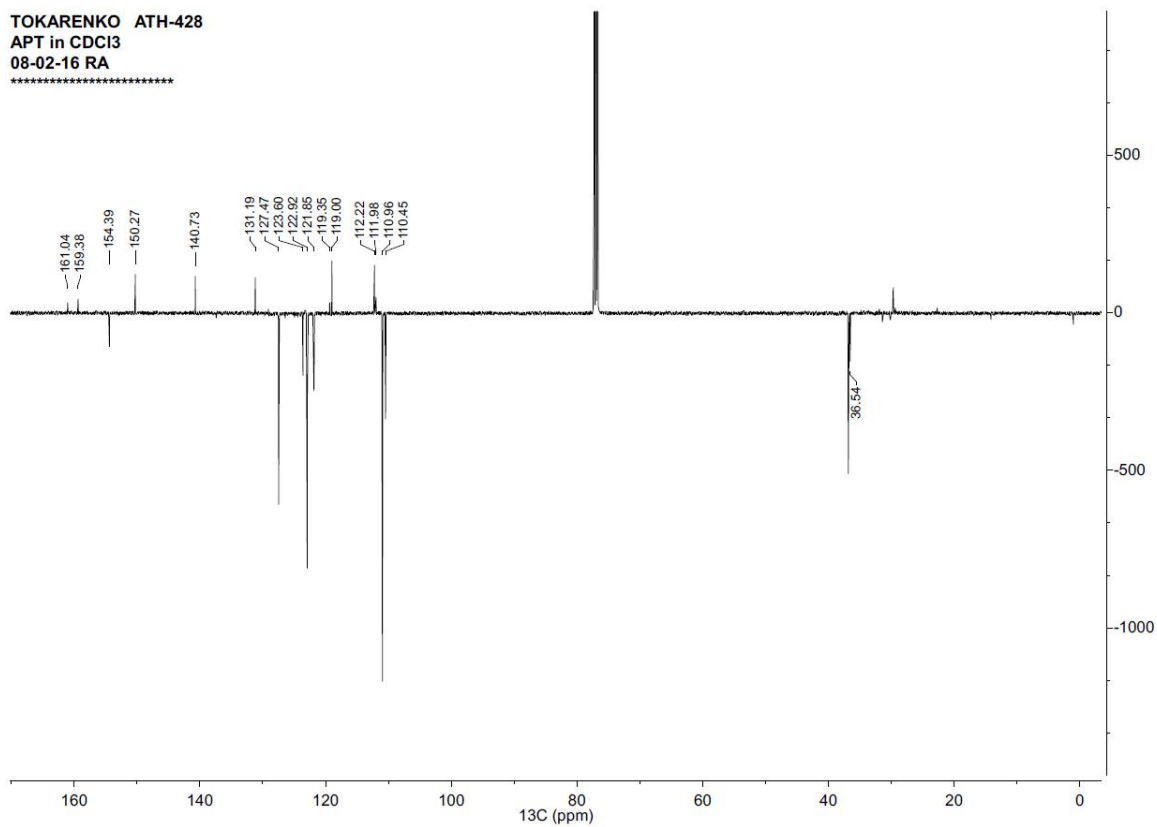

TOKARENKO ATH-428  
 1H NMR in DMSO-d6  
 08-02-16 RA  
 \*\*\*\*\*

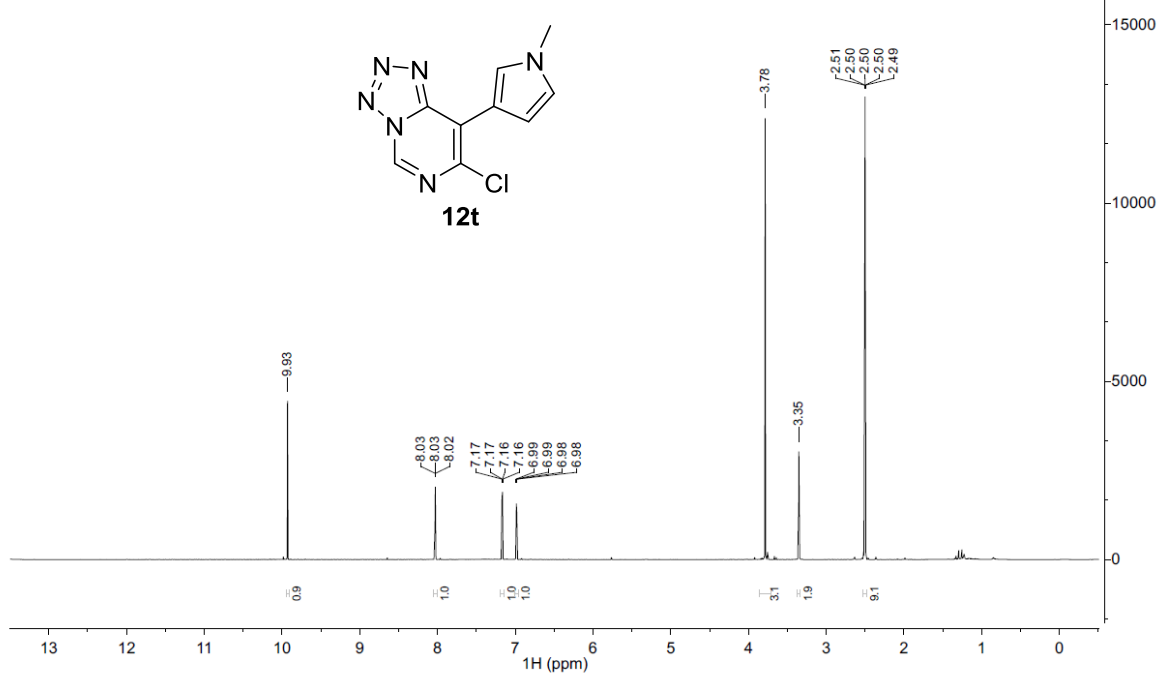

TOKARENKO ATH-428  
 APT in DMSO-d6  
 08-02-16 RA  
 \*\*\*\*\*

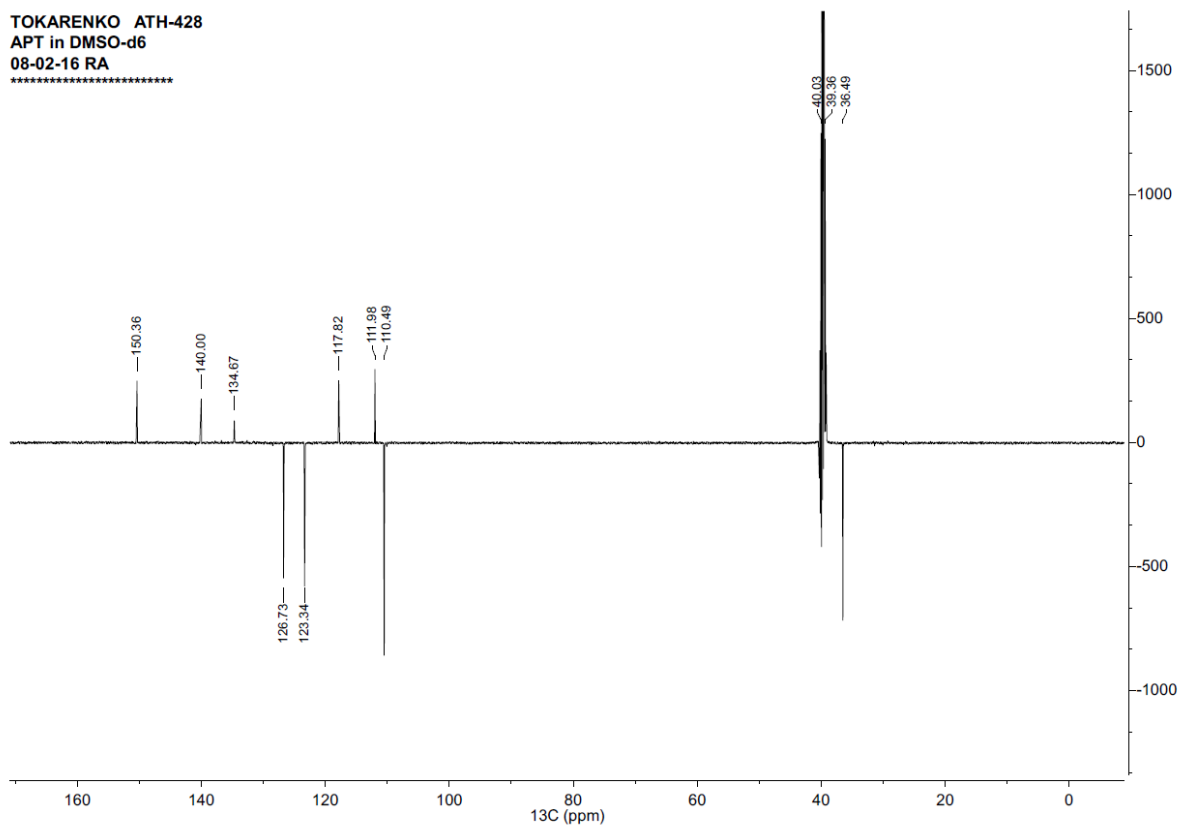

# NMR spectra of compound **13** (**13t**)

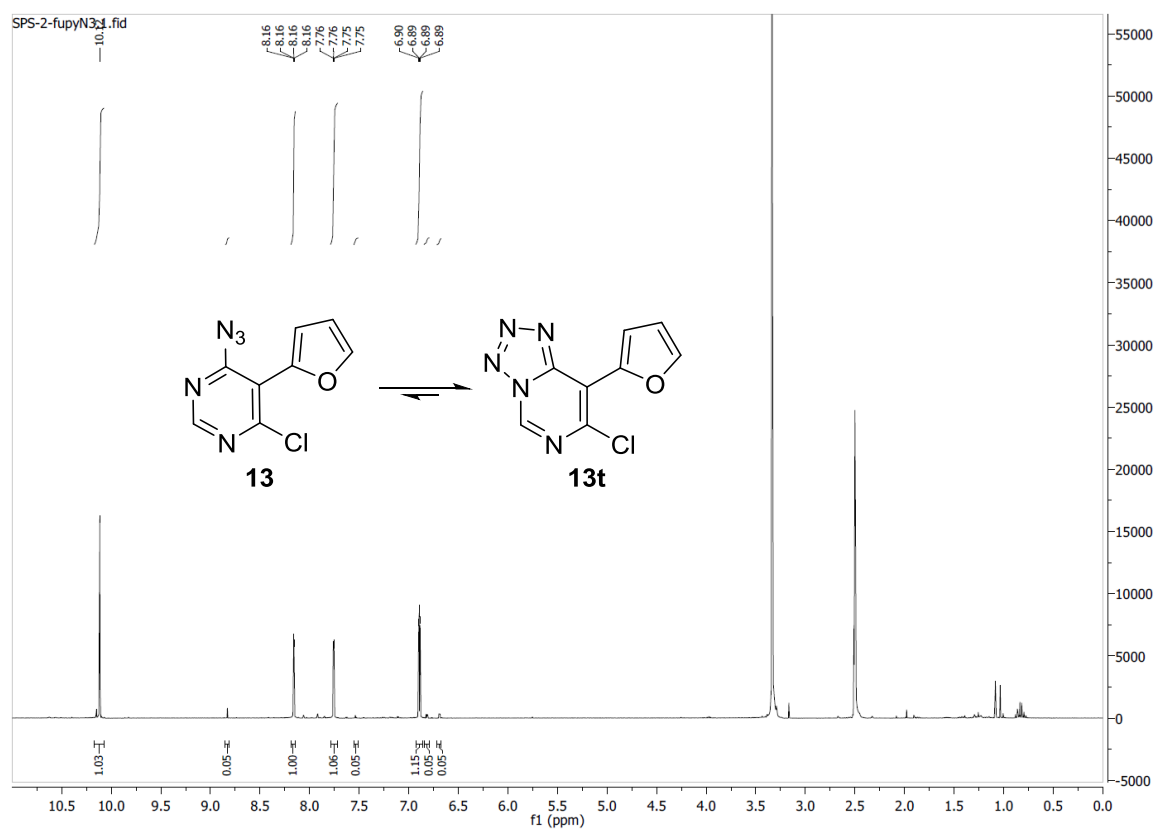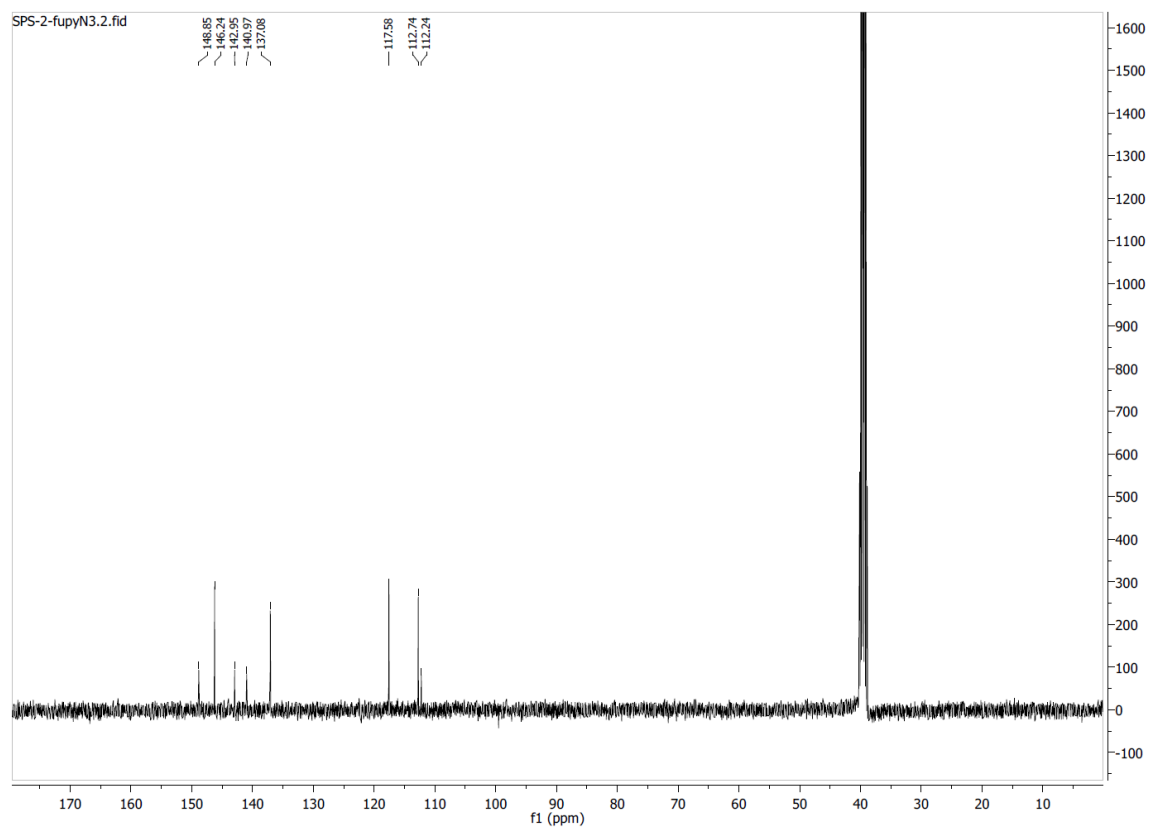

# NMR spectra of compound **14** (**14t**)

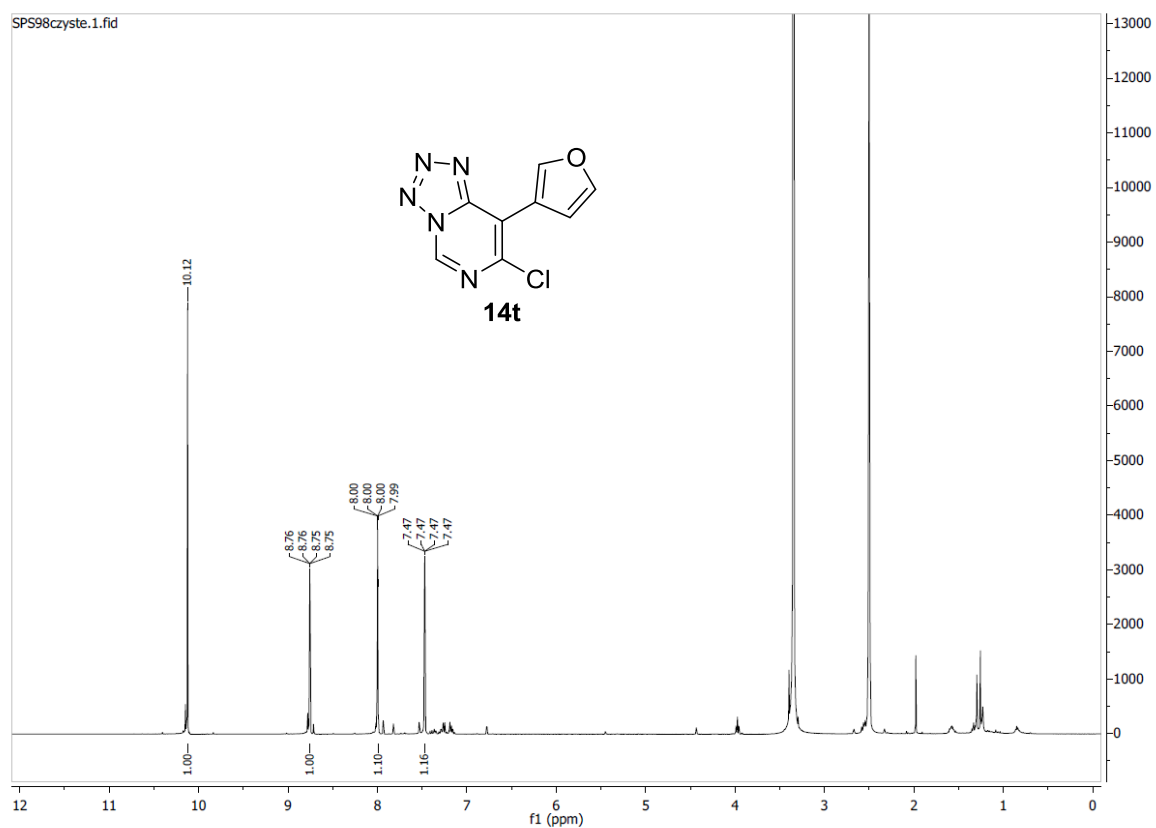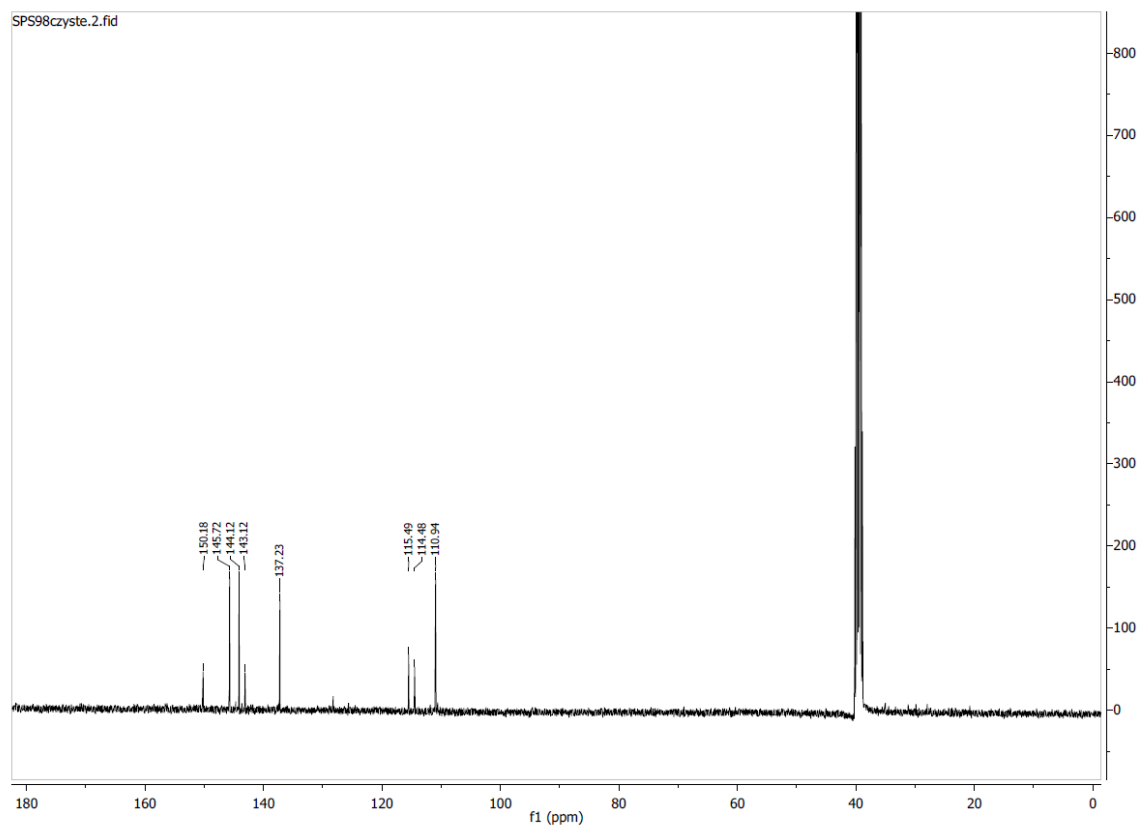

# NMR spectra of compound **15**

TOKARENKO ATH-394-1  
 1H NMR in DMSO-d6  
 02-09-15 RA  
 \*\*\*\*\*

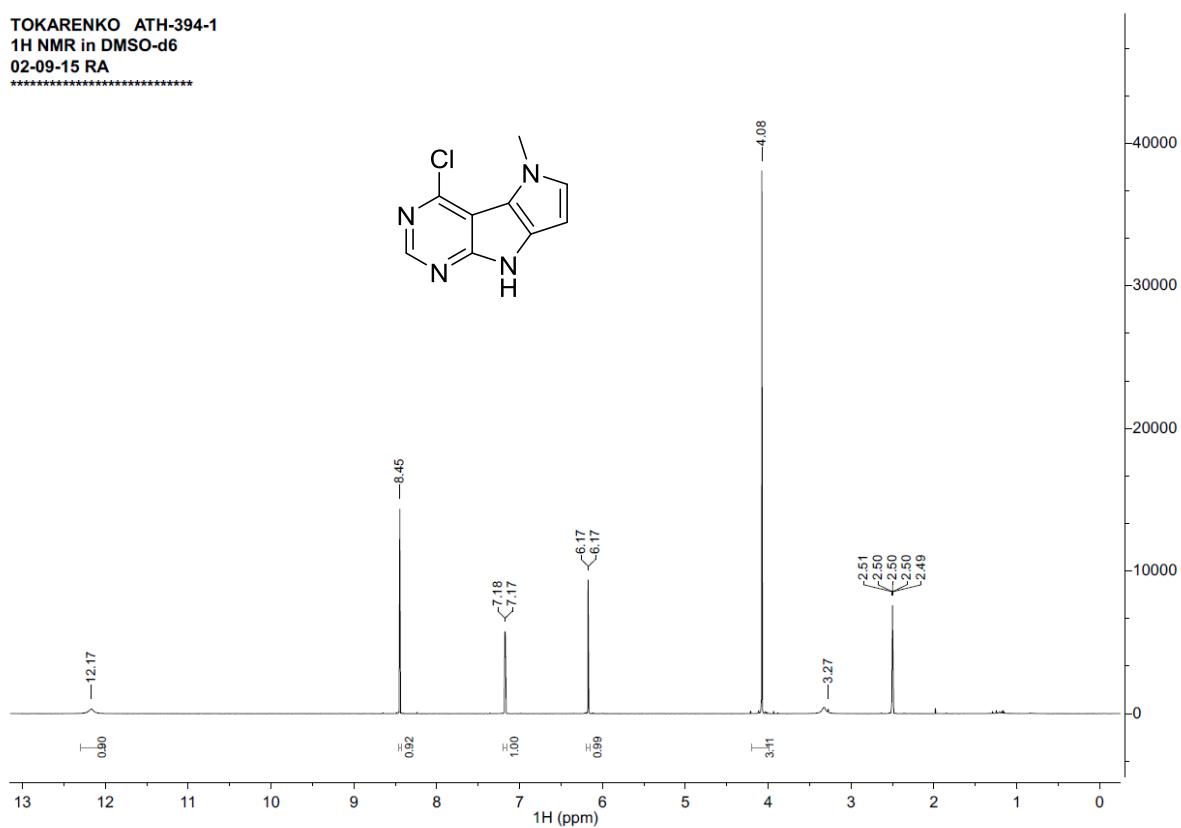

TOKARENKO ATH-394-1  
 APT in DMSO-d6  
 02-09-15 RA  
 \*\*\*\*\*

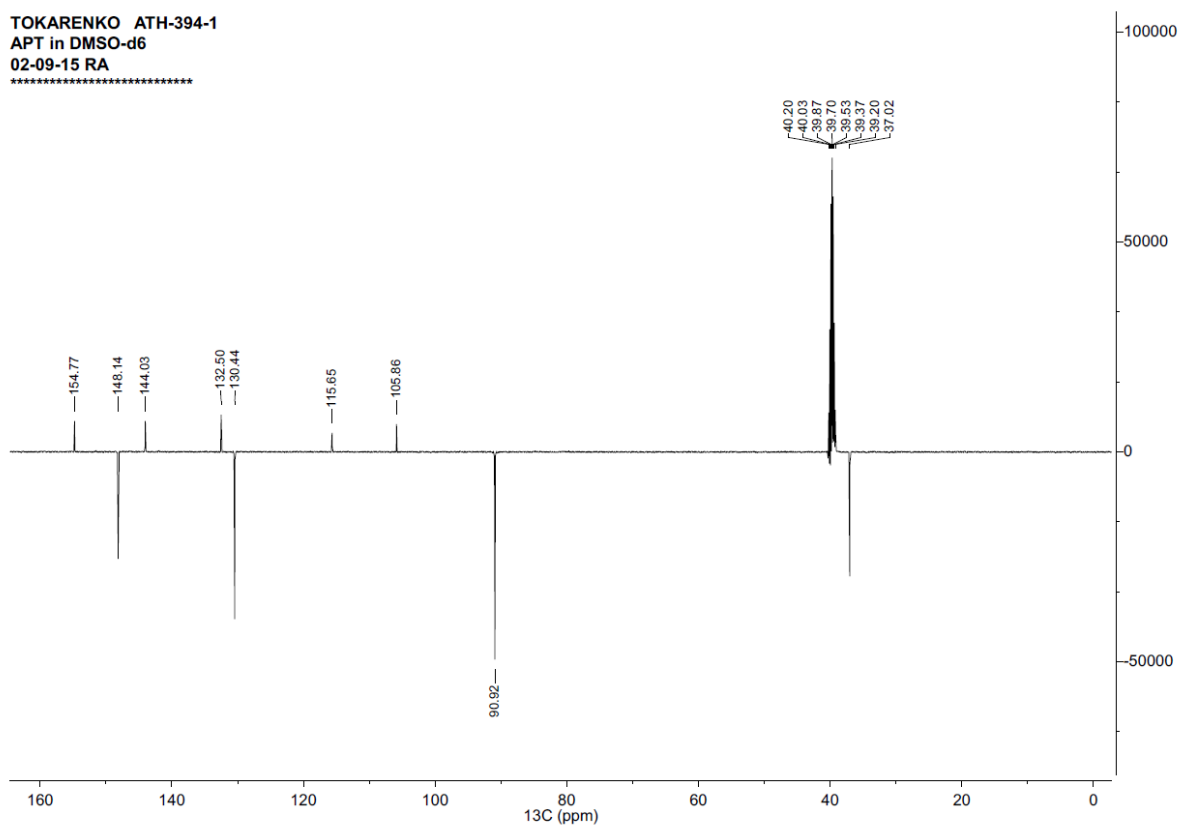

# NMR spectra of compound **16**

TOKARENKO ATH-434  
 1H NMR in DMSO-d6  
 14-02-16 RA  
 \*\*\*\*\*

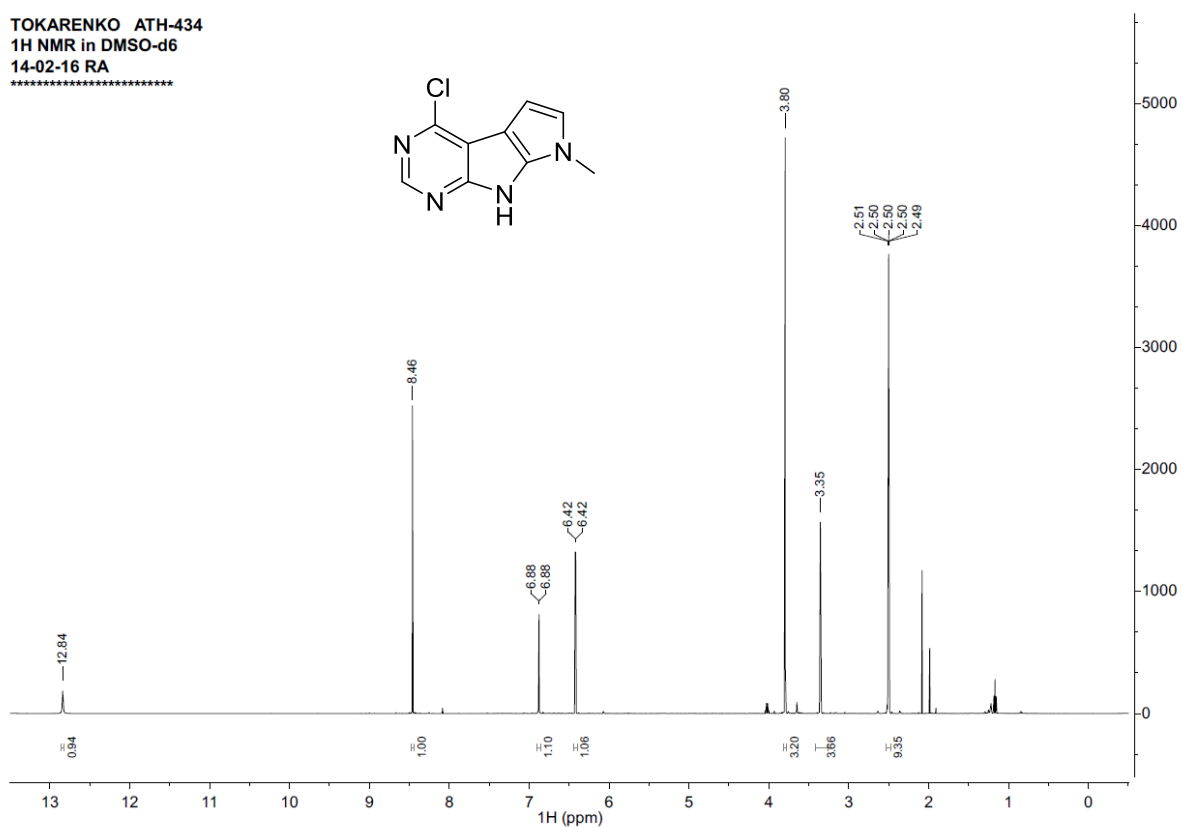

TOKARENKO ATH-434  
 APT in DMSO-d6  
 14-03-16 RA  
 \*\*\*\*\*

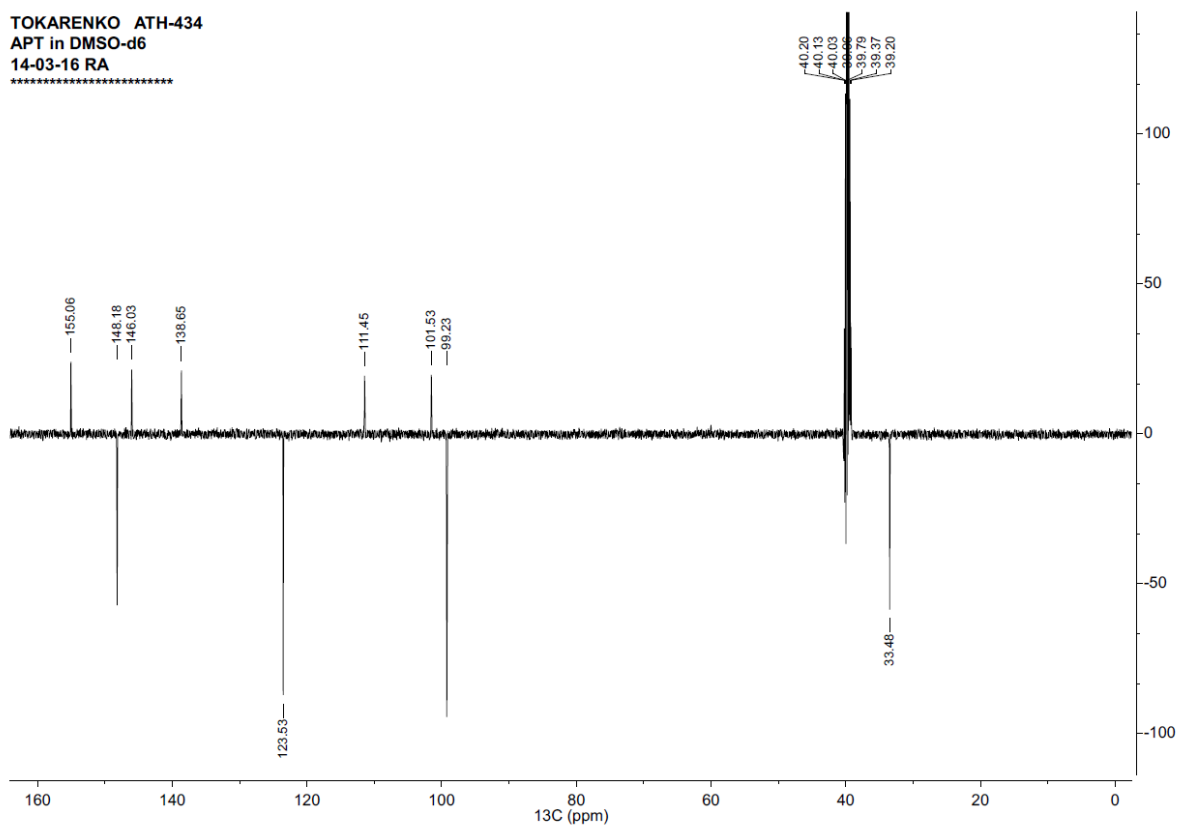

# NMR spectra of compound **17**

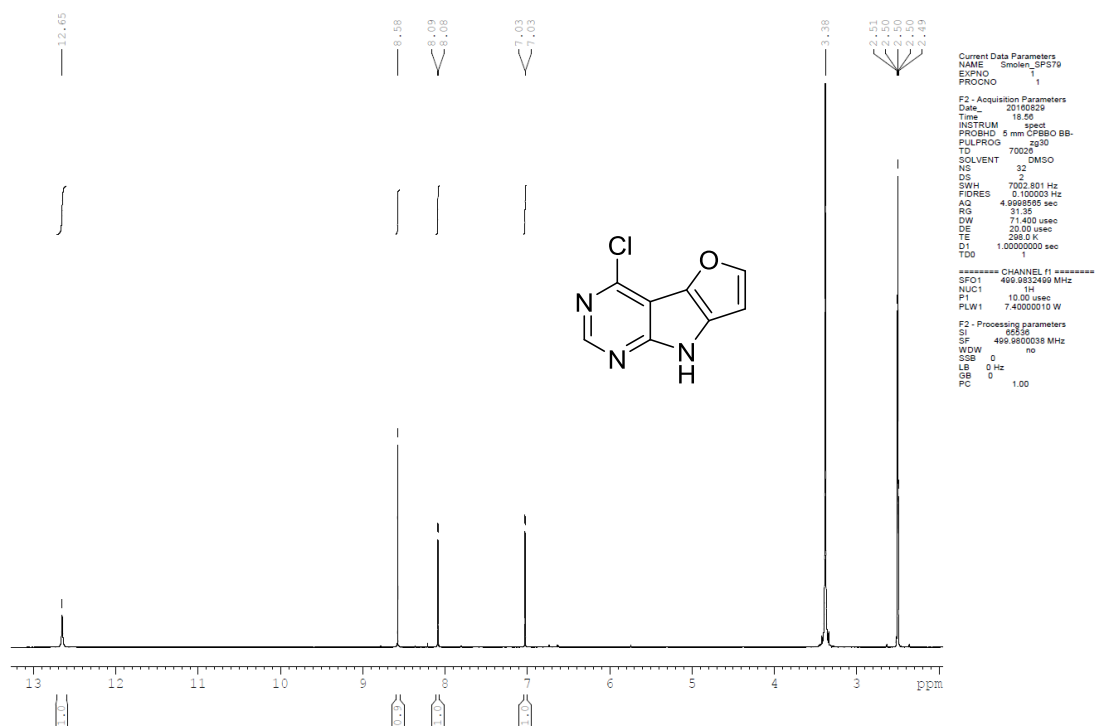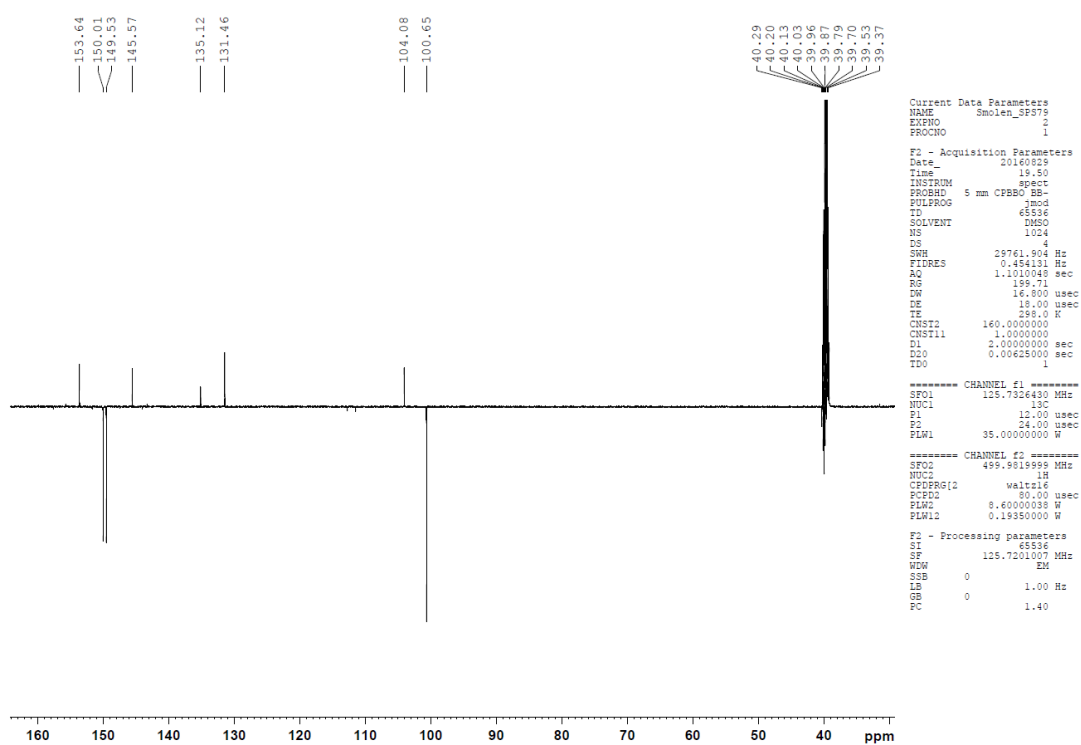

# NMR spectra of compound **18**

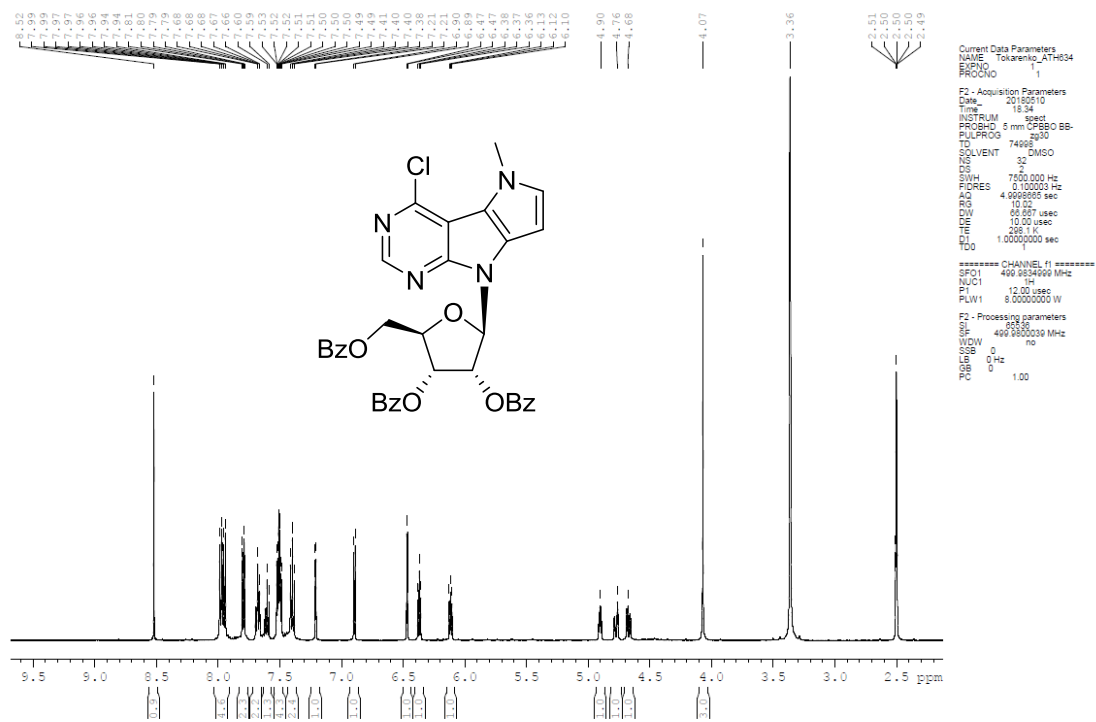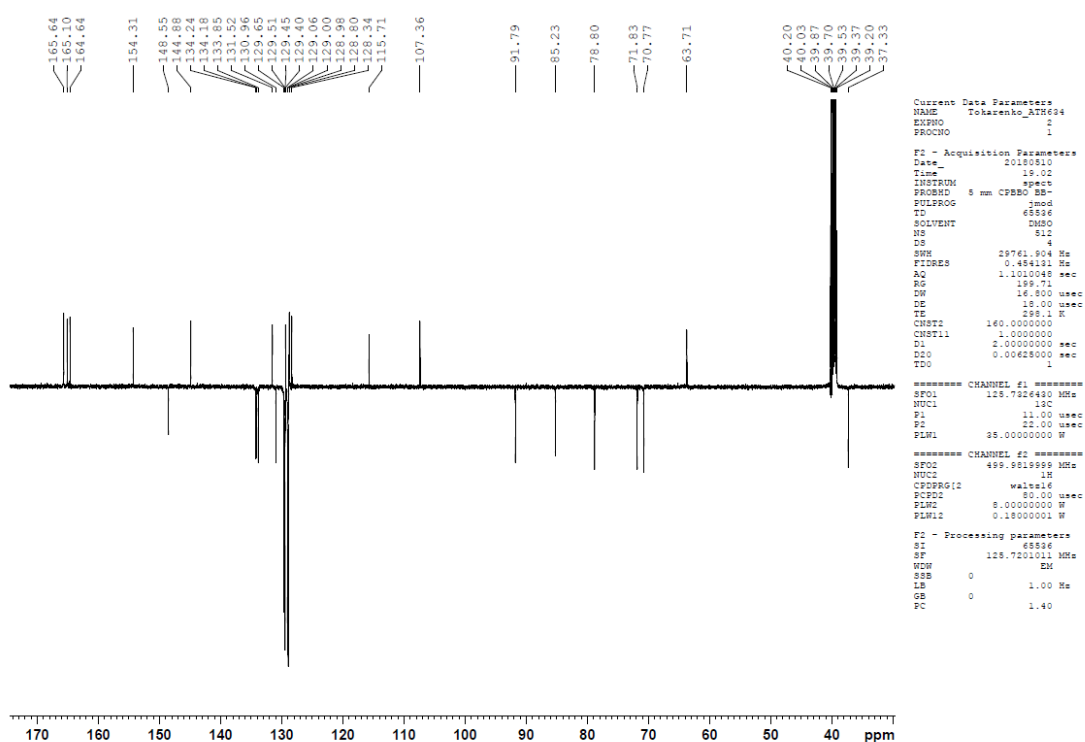



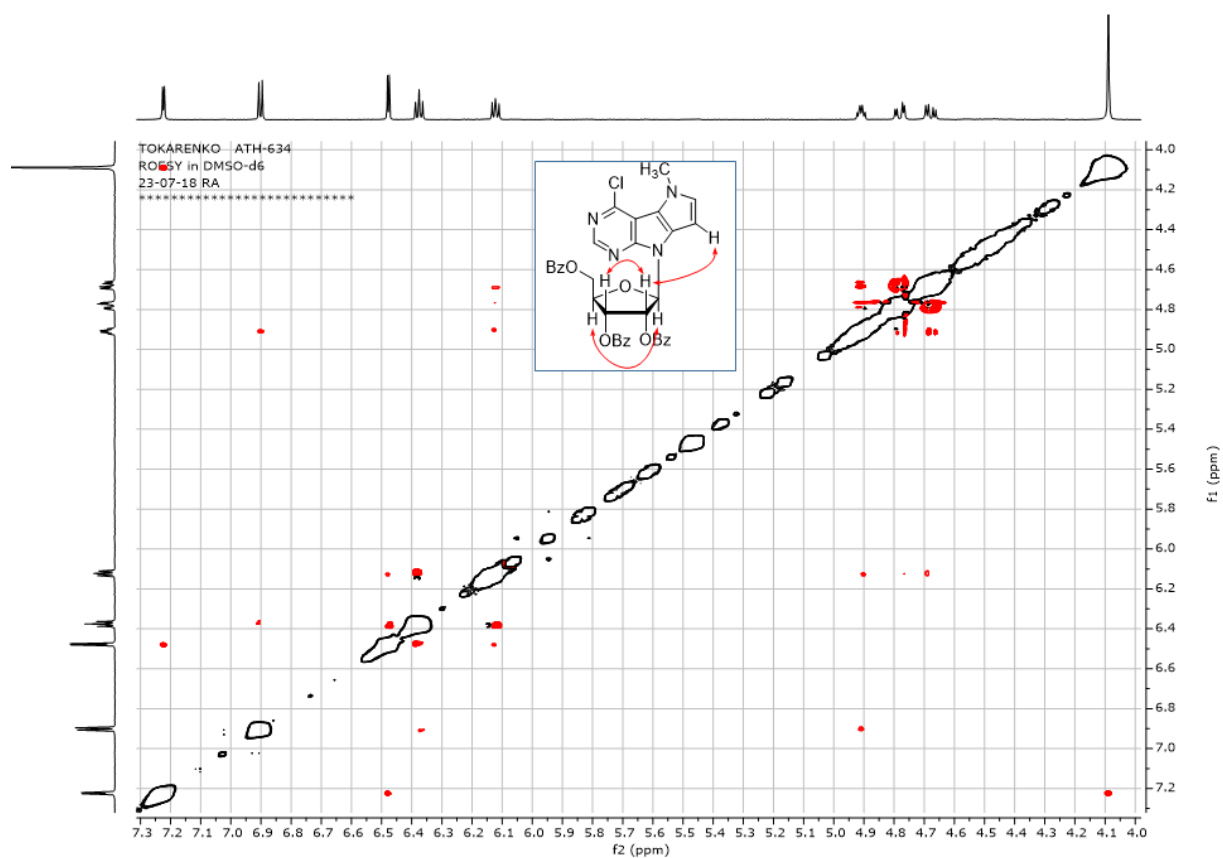

# NMR spectra of compound **19**

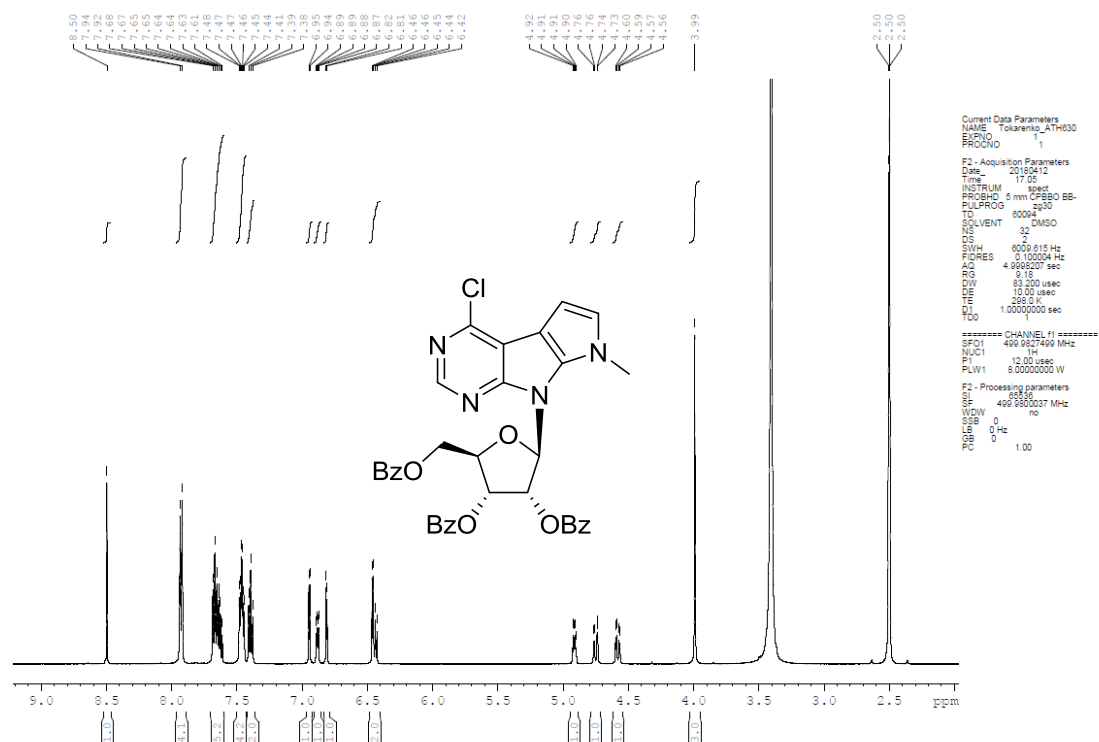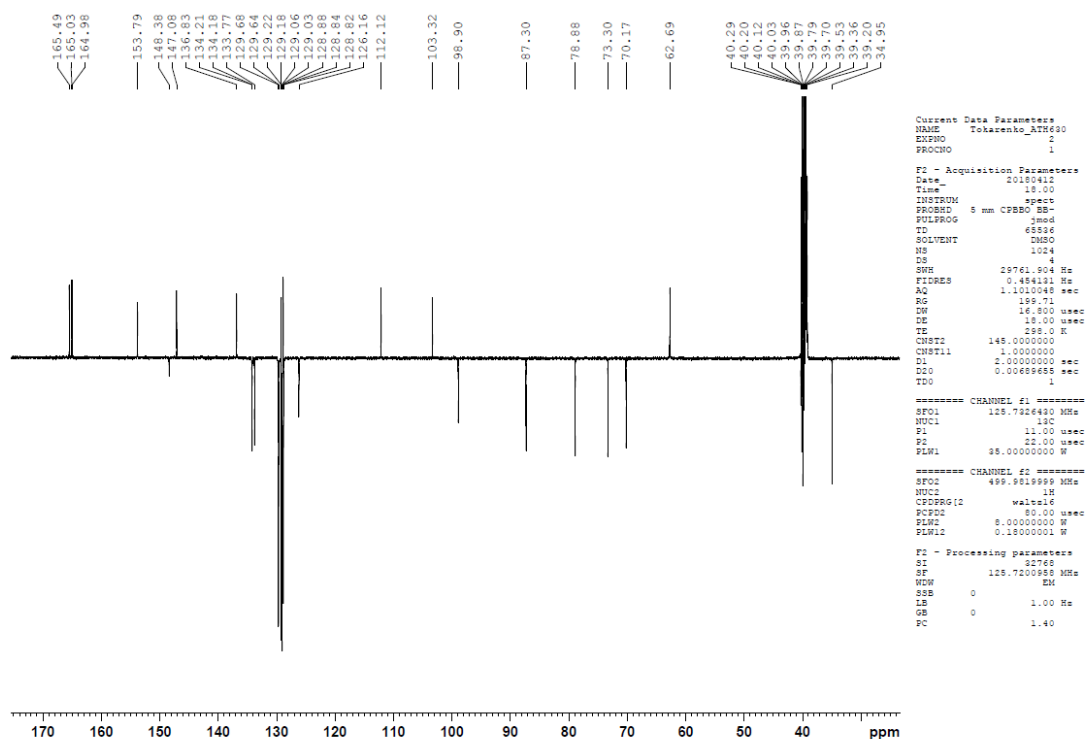

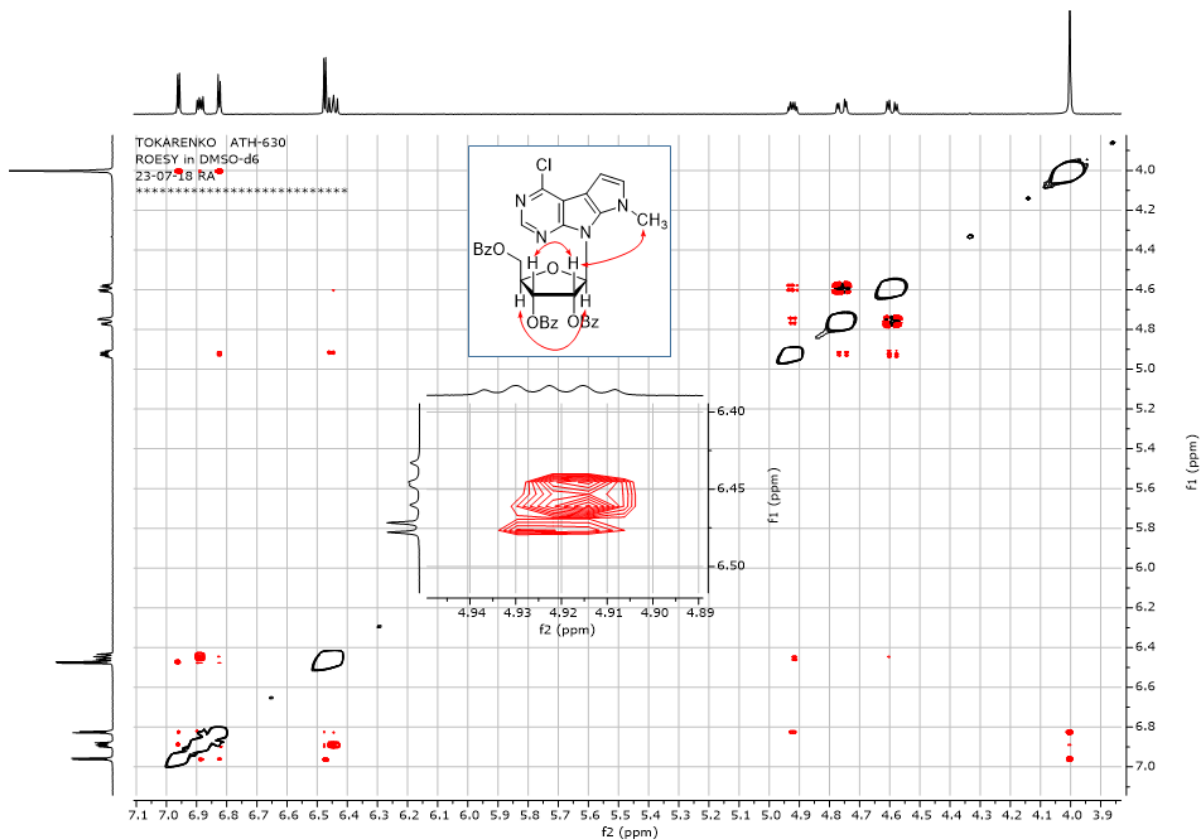

# NMR spectra of compound 20

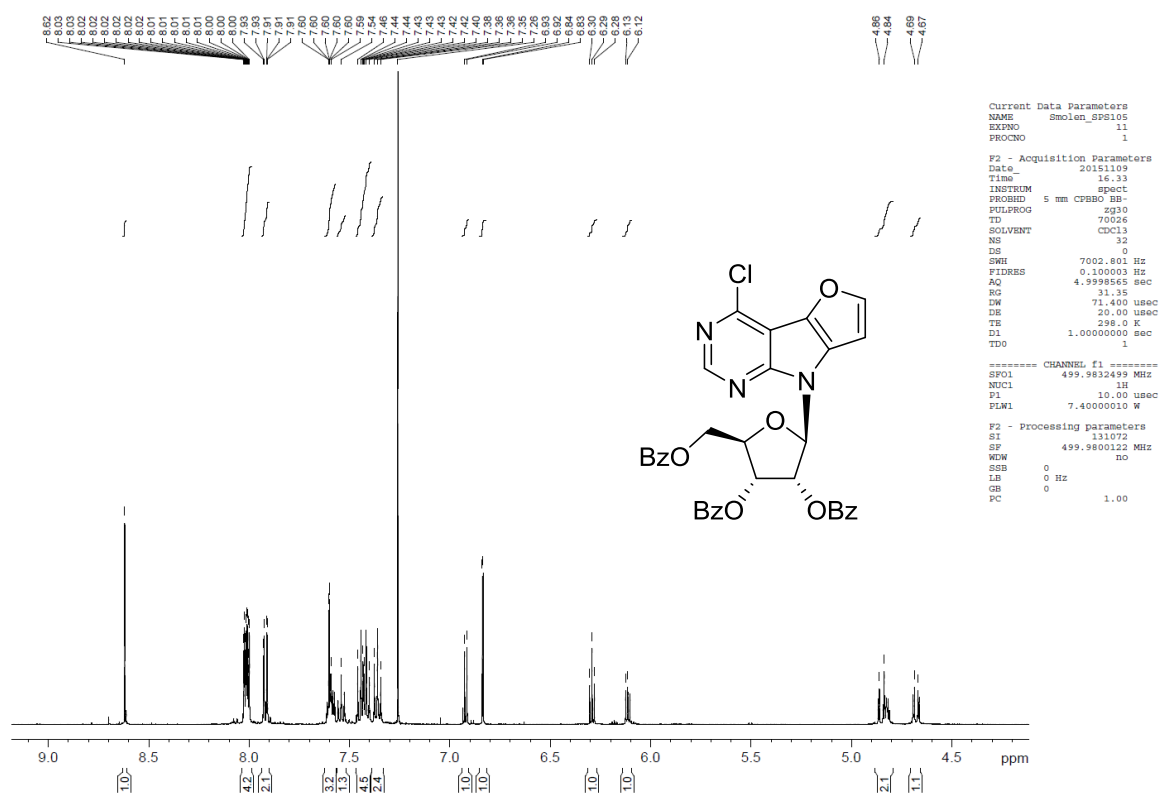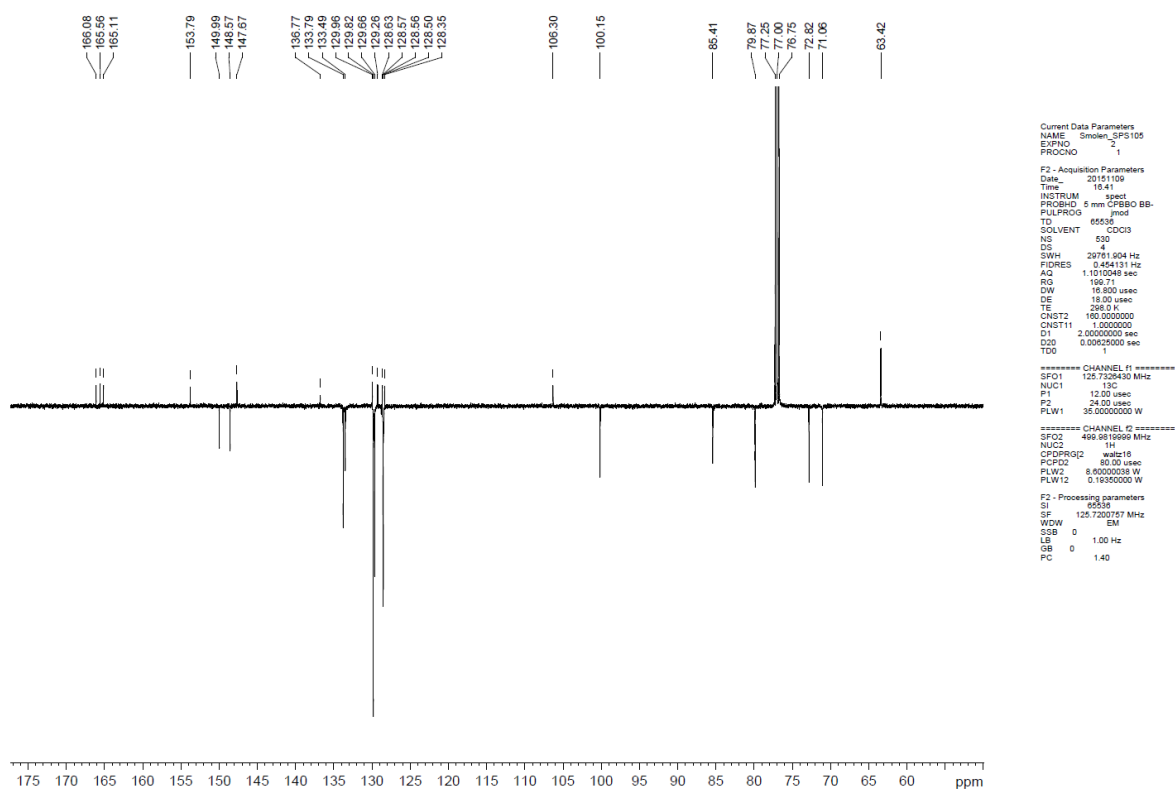

S21

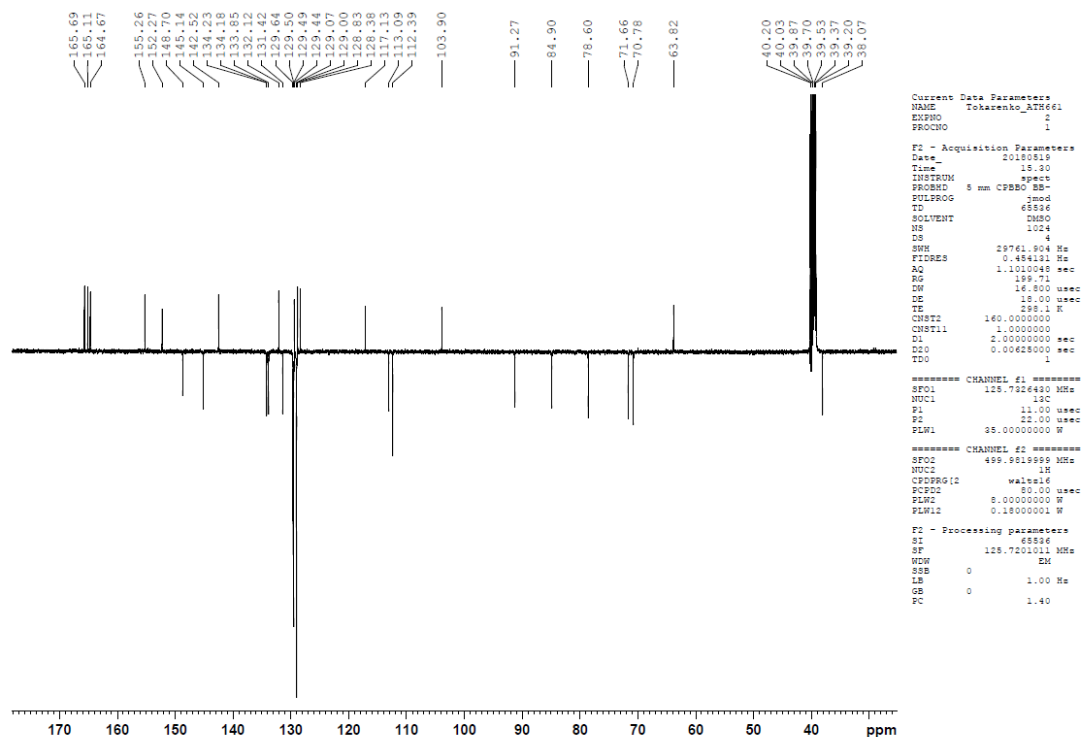

# NMR spectra of compound **21b**

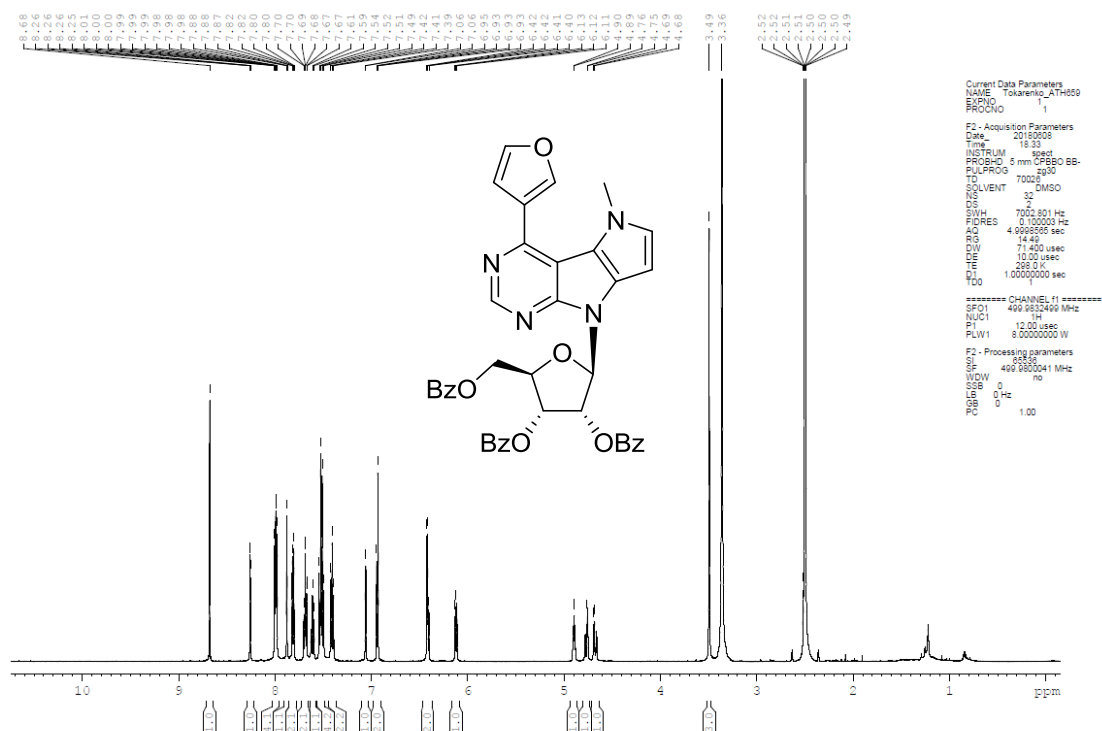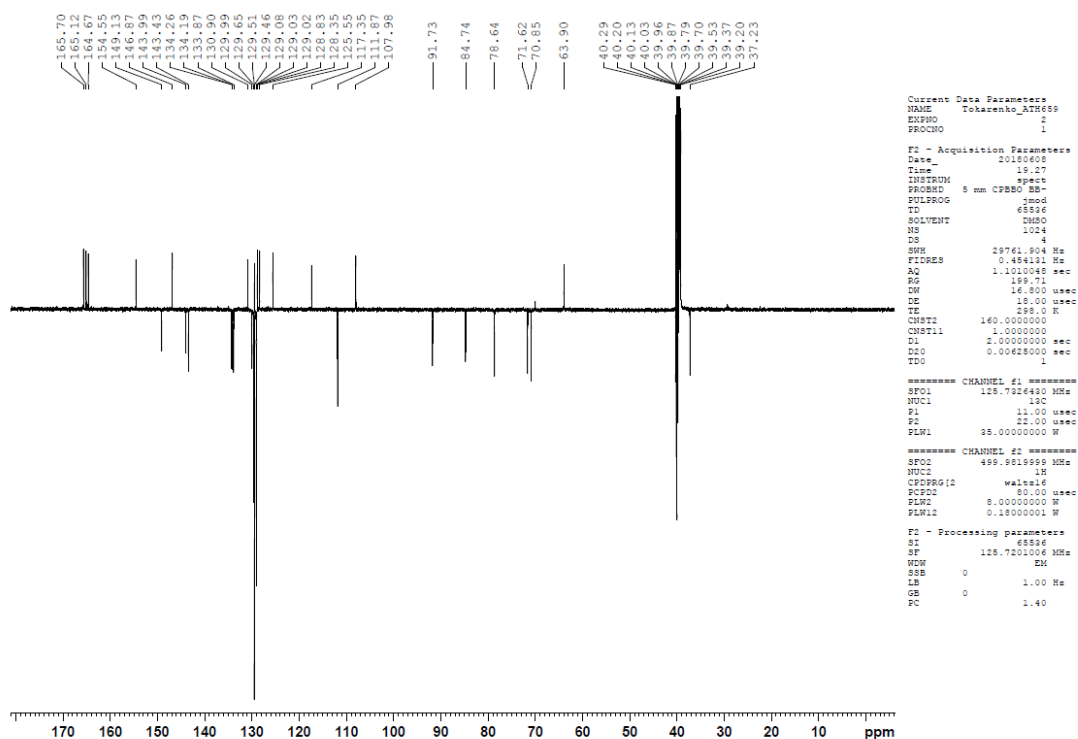

## S23

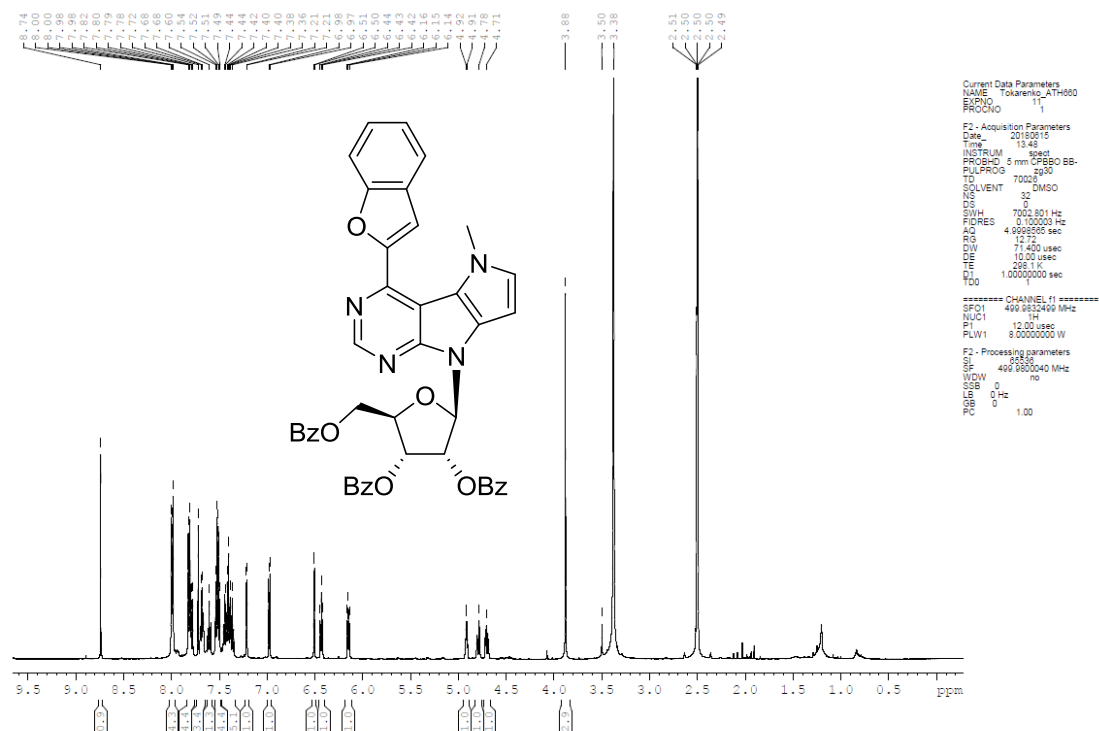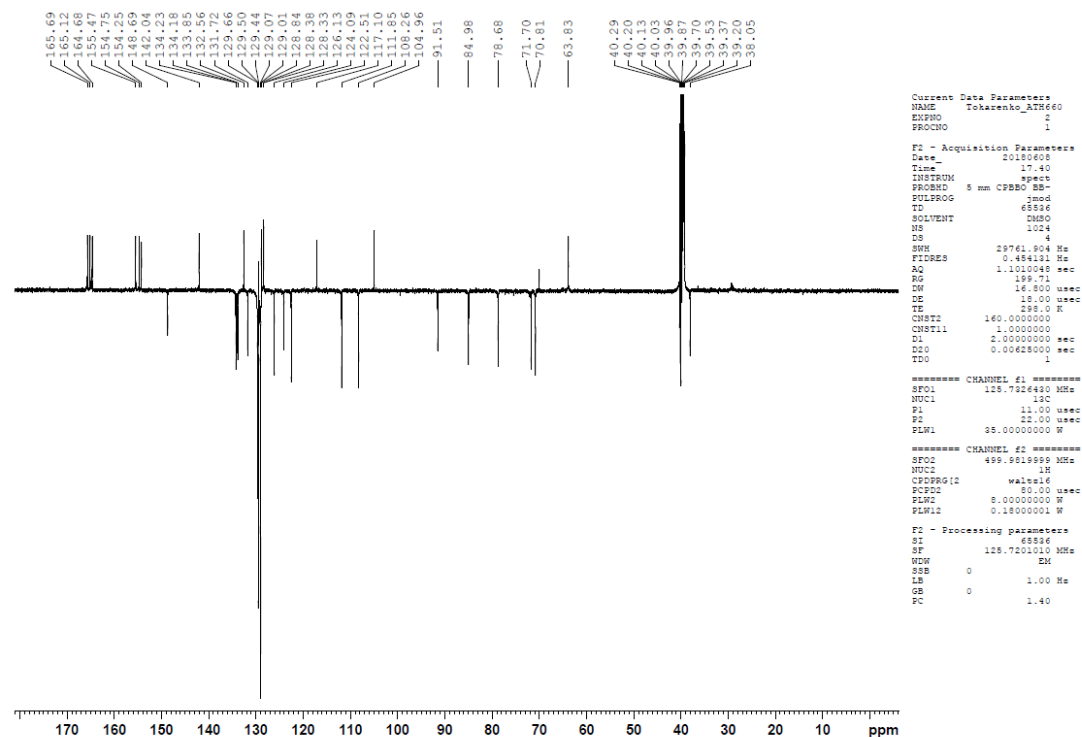

# NMR spectra of compound **21d**

TOKARENKO ATH-555

<sup>1</sup>H NMR in DMSO-d<sub>6</sub>

11-08-17 RA

\*\*\*\*\*

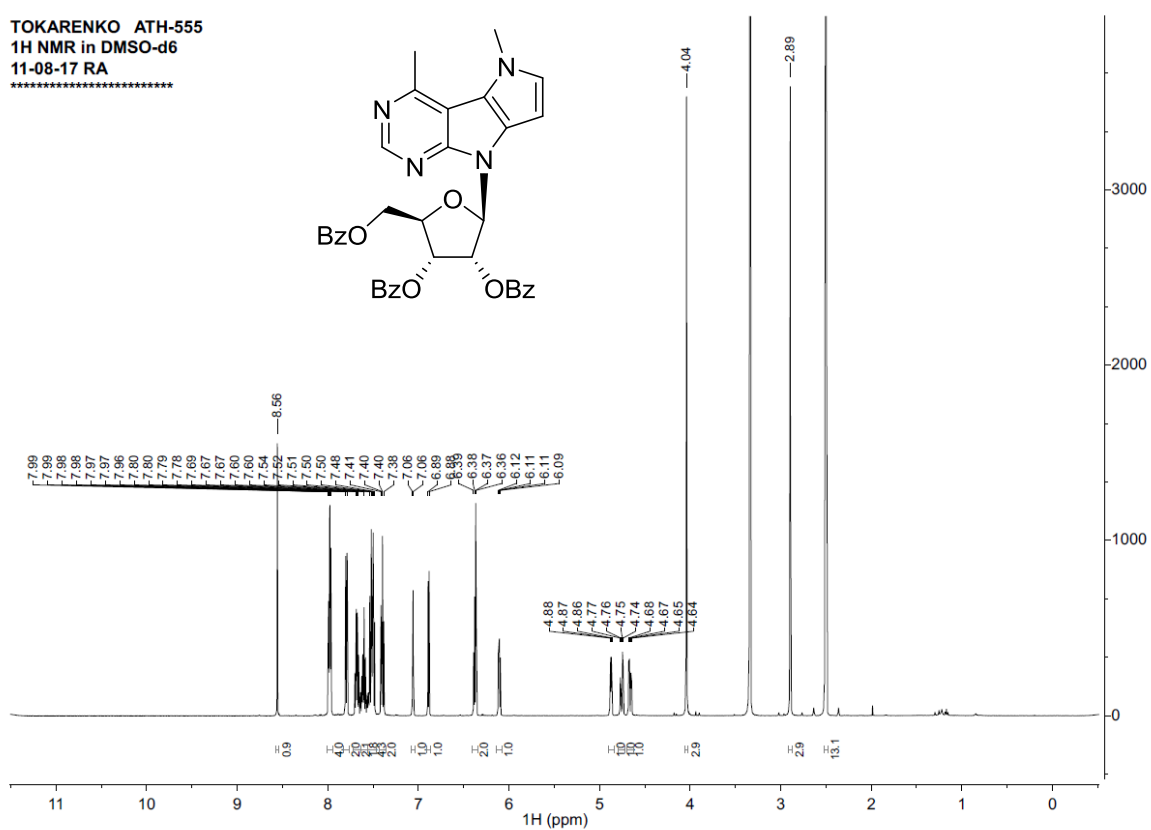



# NMR spectra of compound **21e**

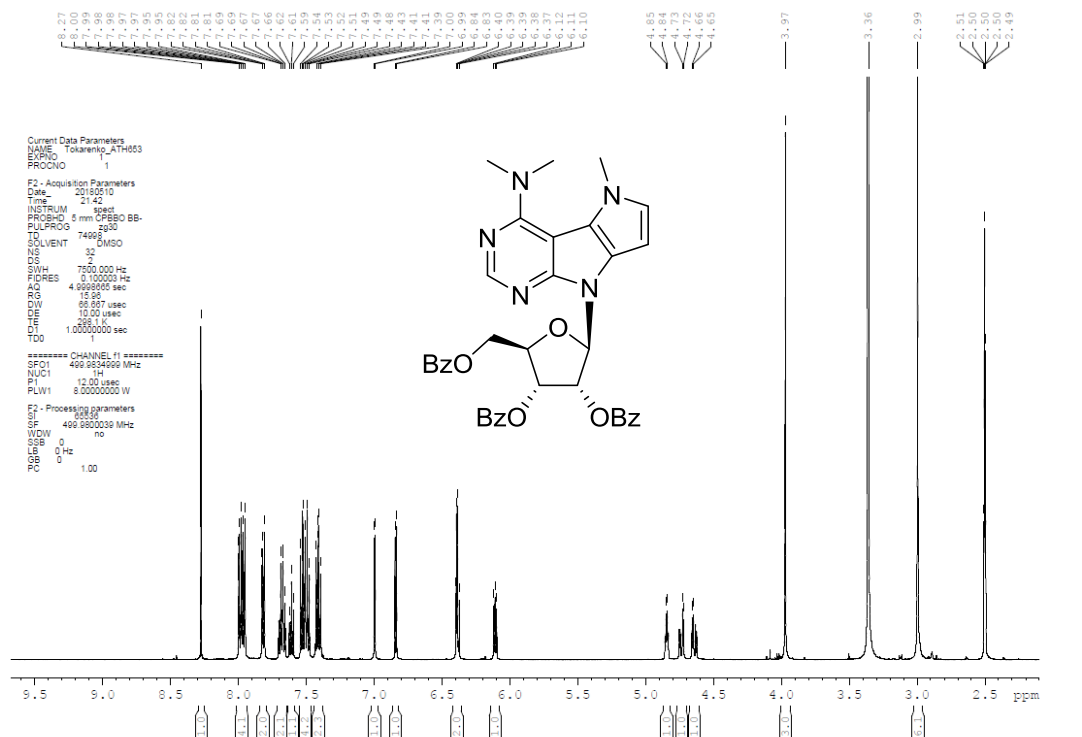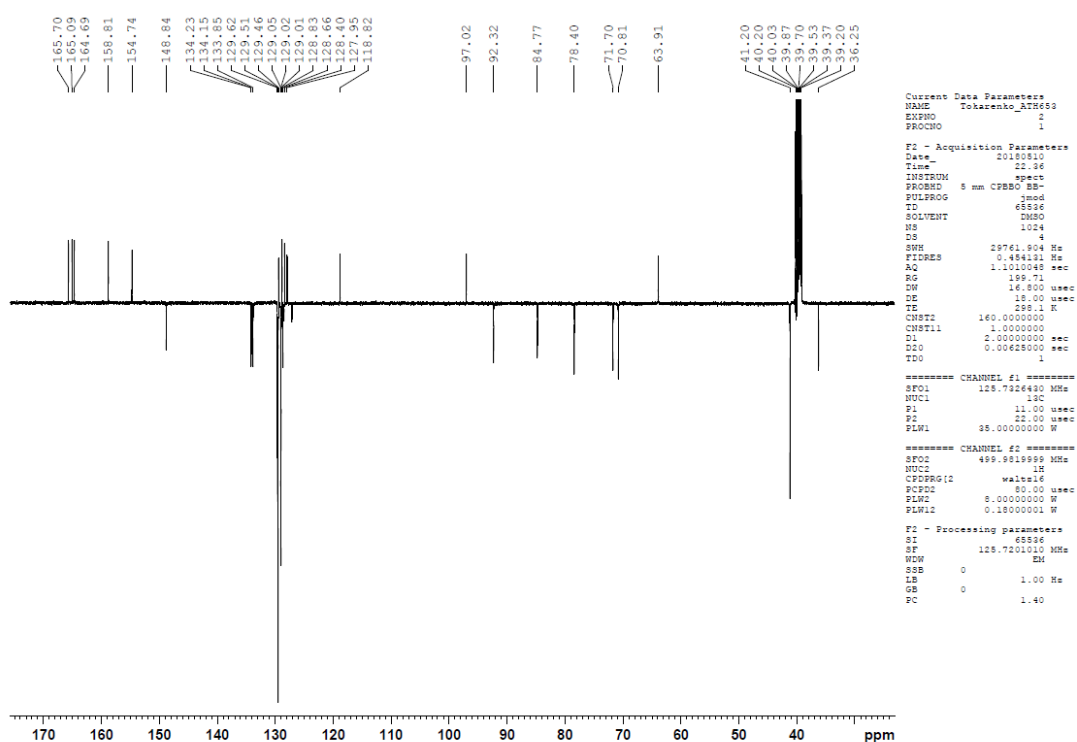

# NMR spectra of compound **22a**

TOKARENKO ATH-481  
 1H NMR in DMSO-d6  
 09-03-17 RA  
 \*\*\*\*\*

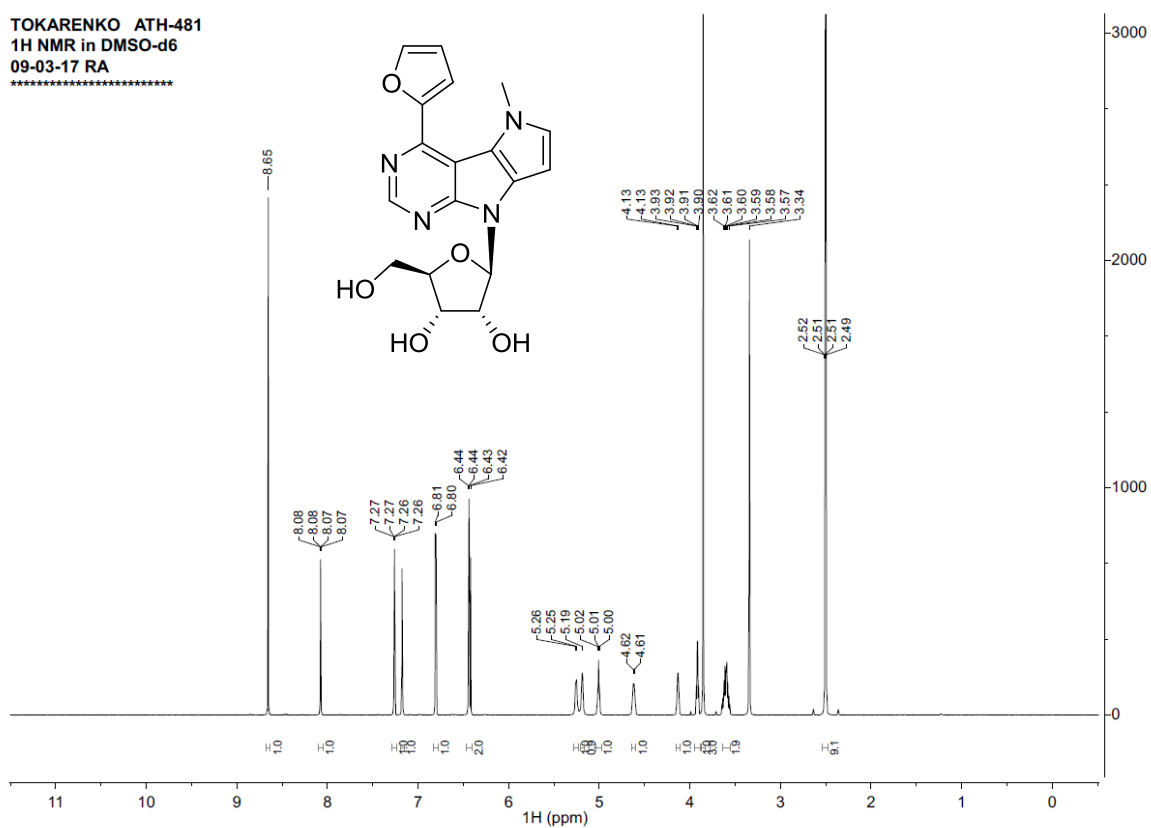

TOKARENKO ATH-481  
 APT in DMSO-d6  
 09-03-17 RA  
 \*\*\*\*\*

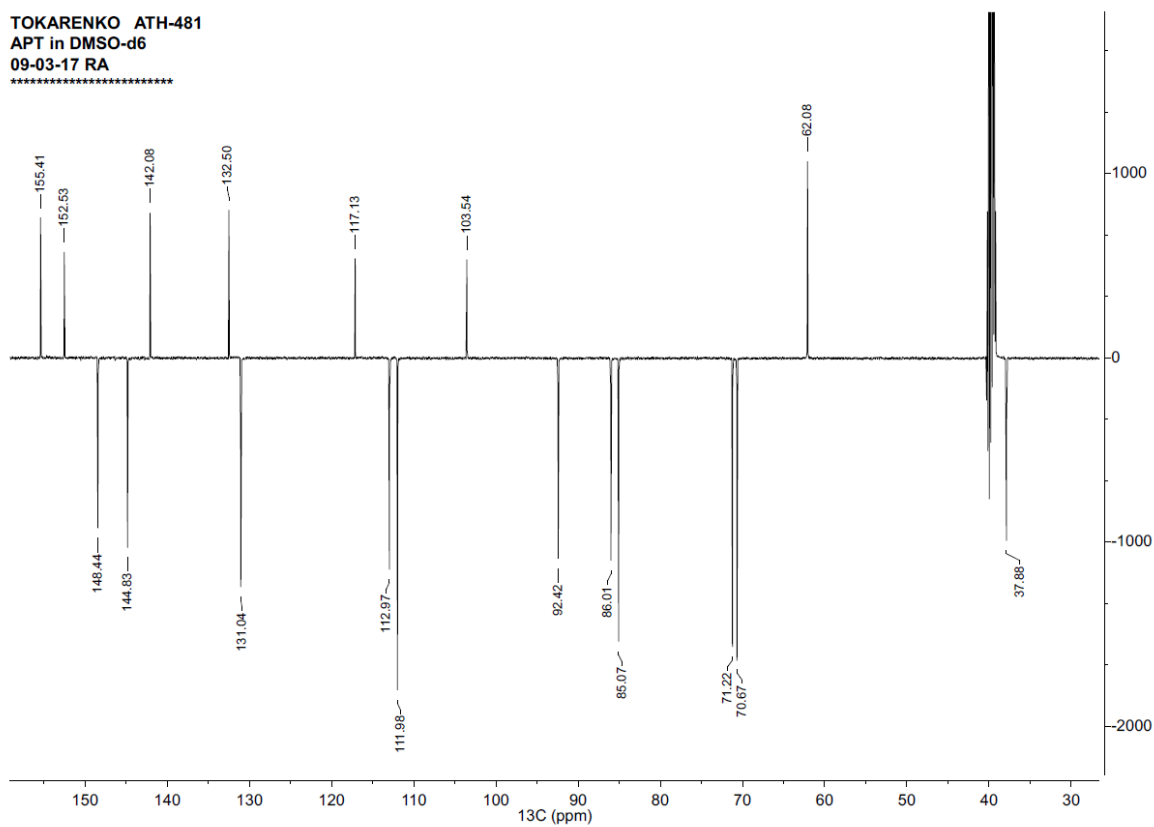

# NMR spectra of compound **22b**

TOKARENKO ATH-479  
 1H NMR in DMSO-d6  
 09-03-17 RA  
 \*\*\*\*\*

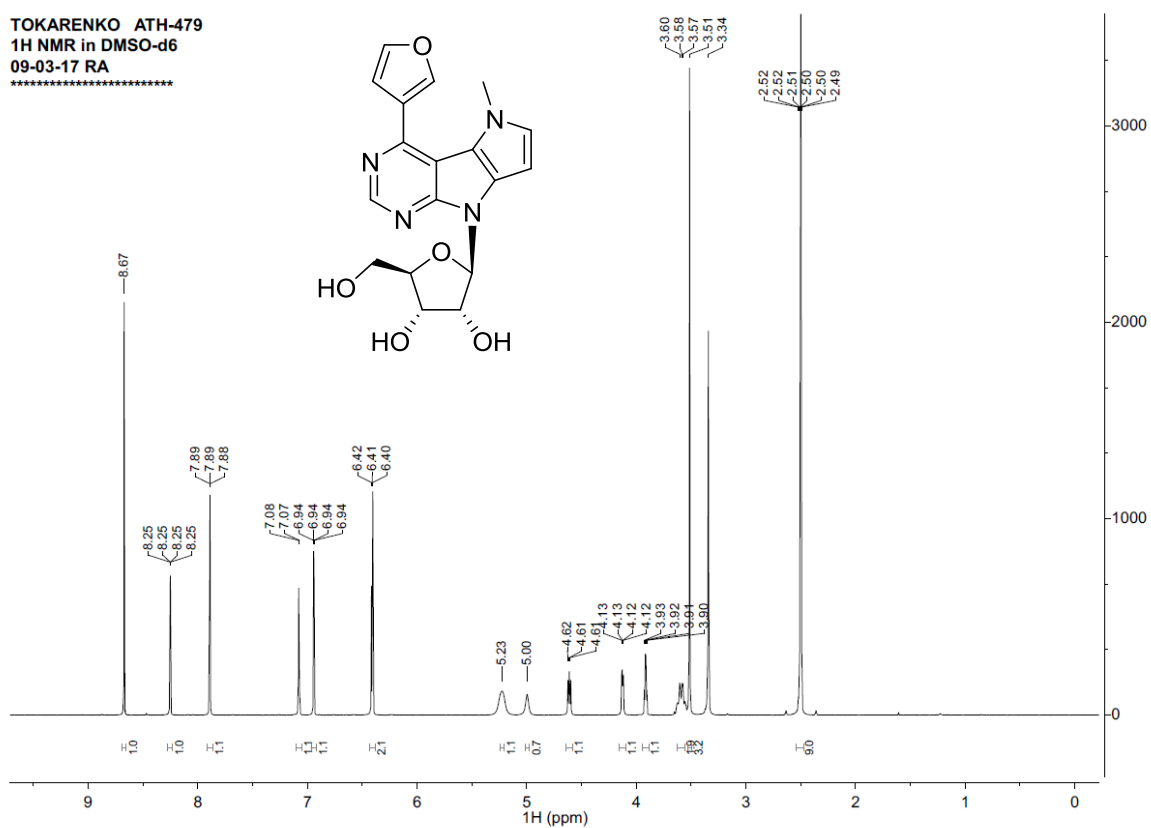

TOKARENKO ATH-479  
 APT in DMSO-d6  
 09-03-17 RA  
 \*\*\*\*\*

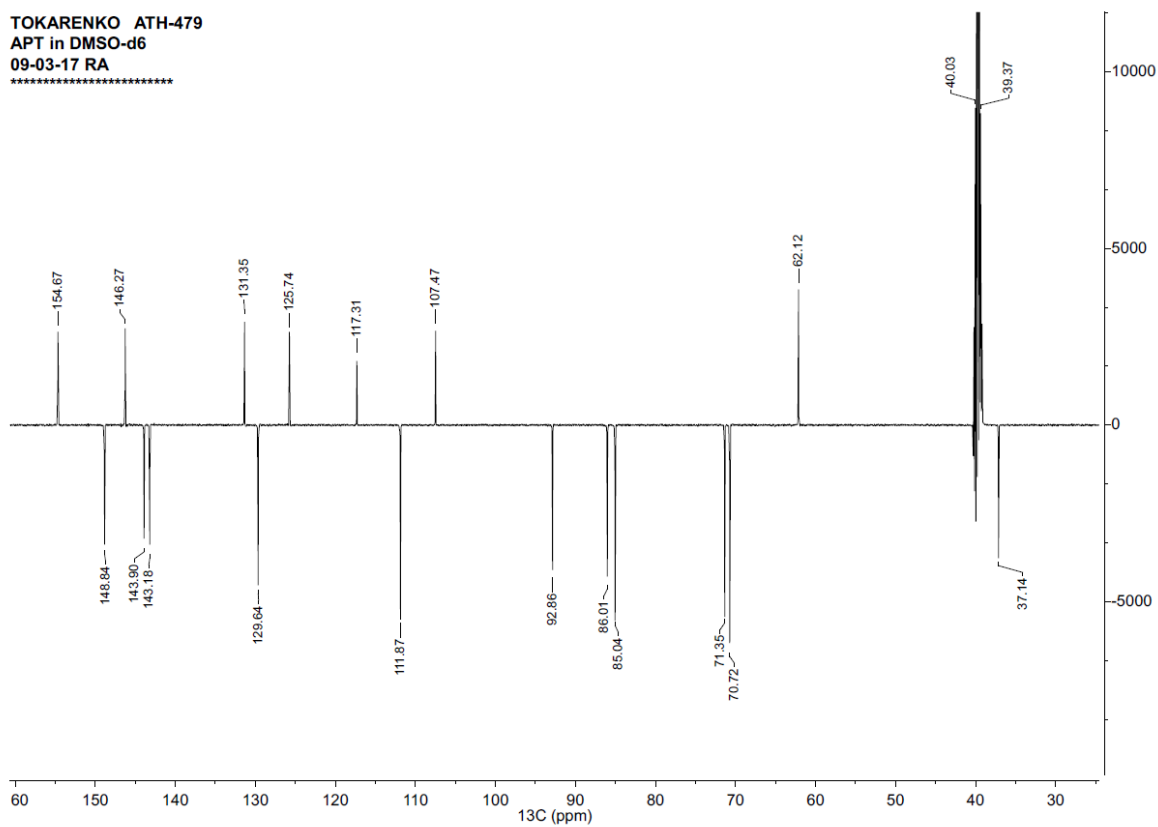

# NMR spectra of compound **22c**

TOKARENKO ATH-480-2  
1H NMR in DMSO-d6  
15-02-17 RA  
\*\*\*\*\*

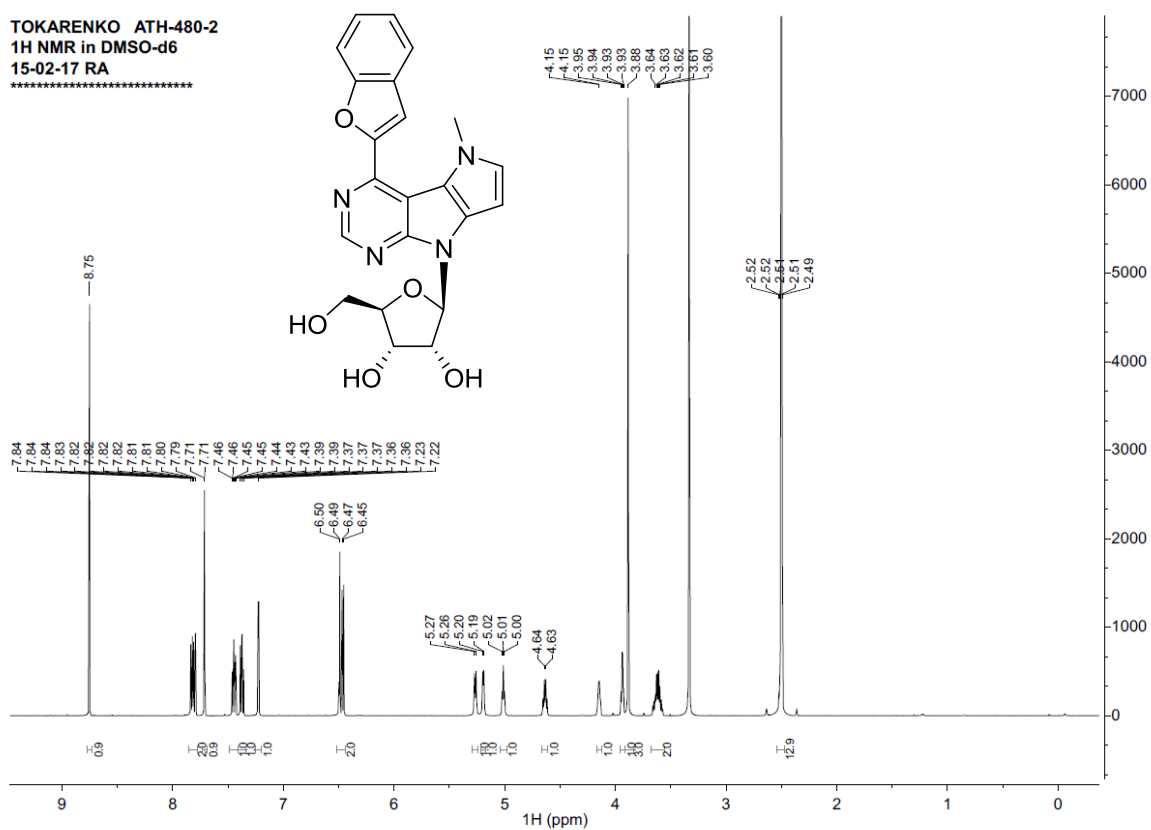

TOKARENKO ATH-480-2  
APT in DMSO-d6  
15-02-17 RA  
\*\*\*\*\*

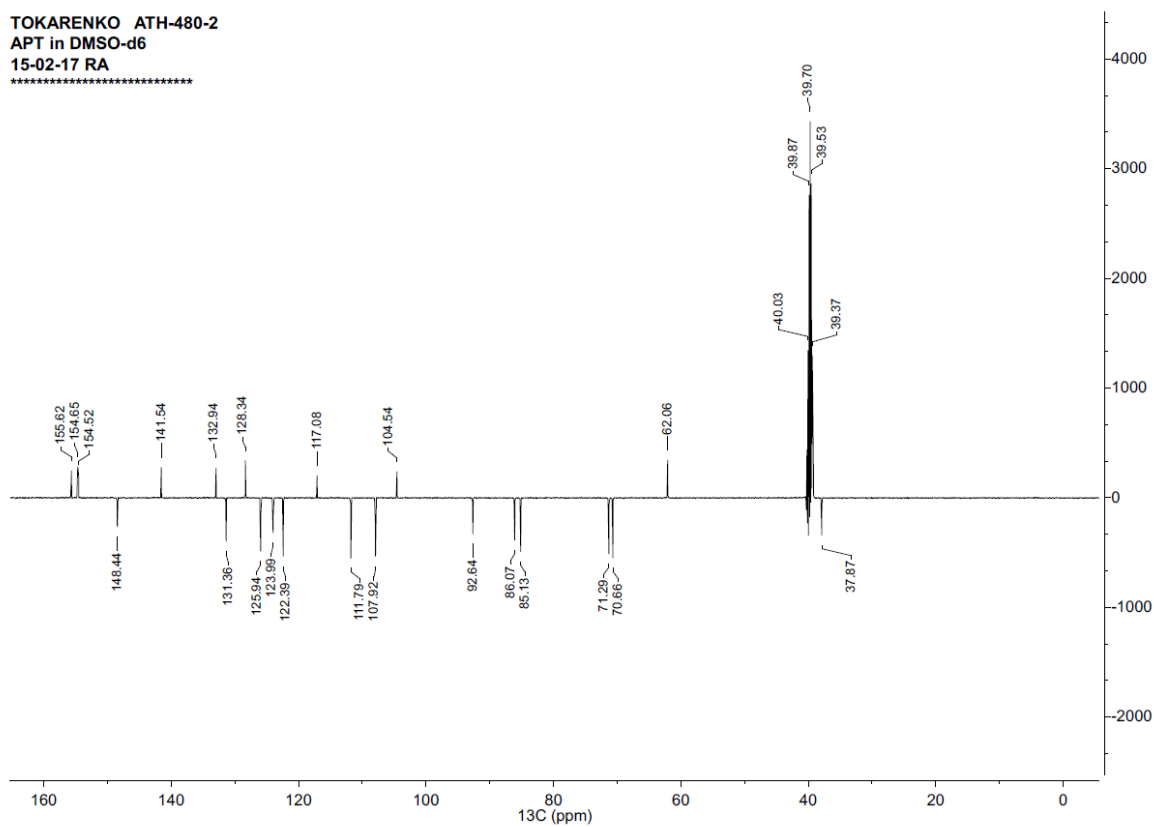

## S29

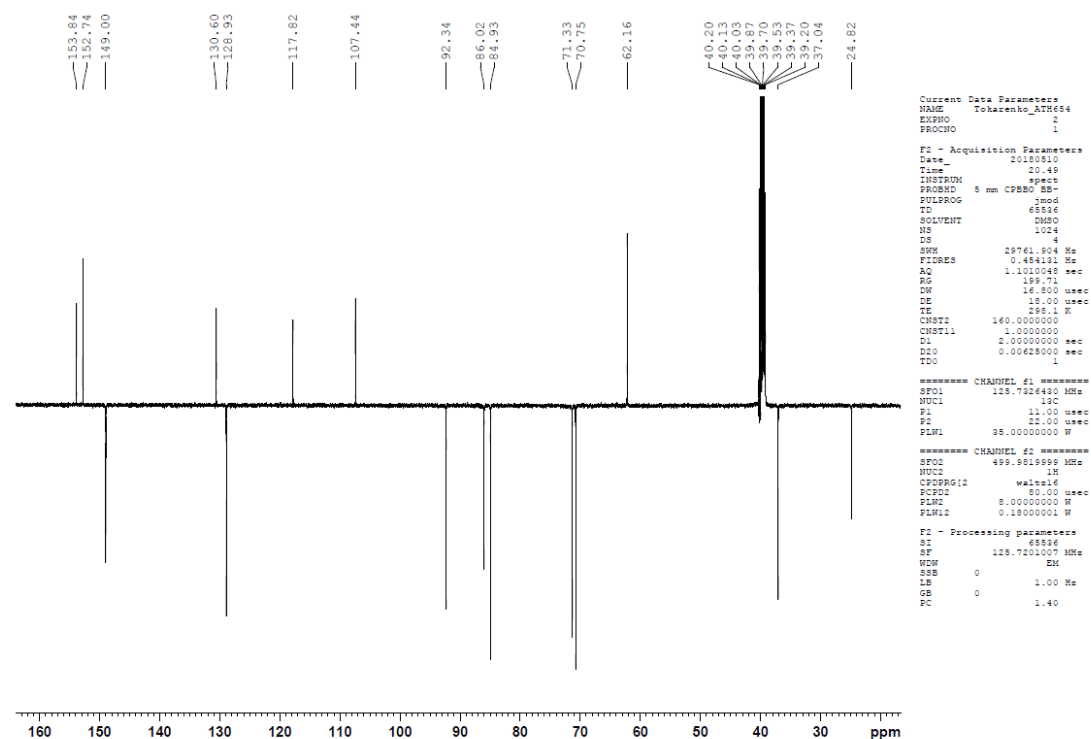

# NMR spectra of compound **22d-MP**

TOKARENKO ATH-566

<sup>1</sup>H NMR in D<sub>2</sub>O

11-11-17 RA

\*\*\*\*\*

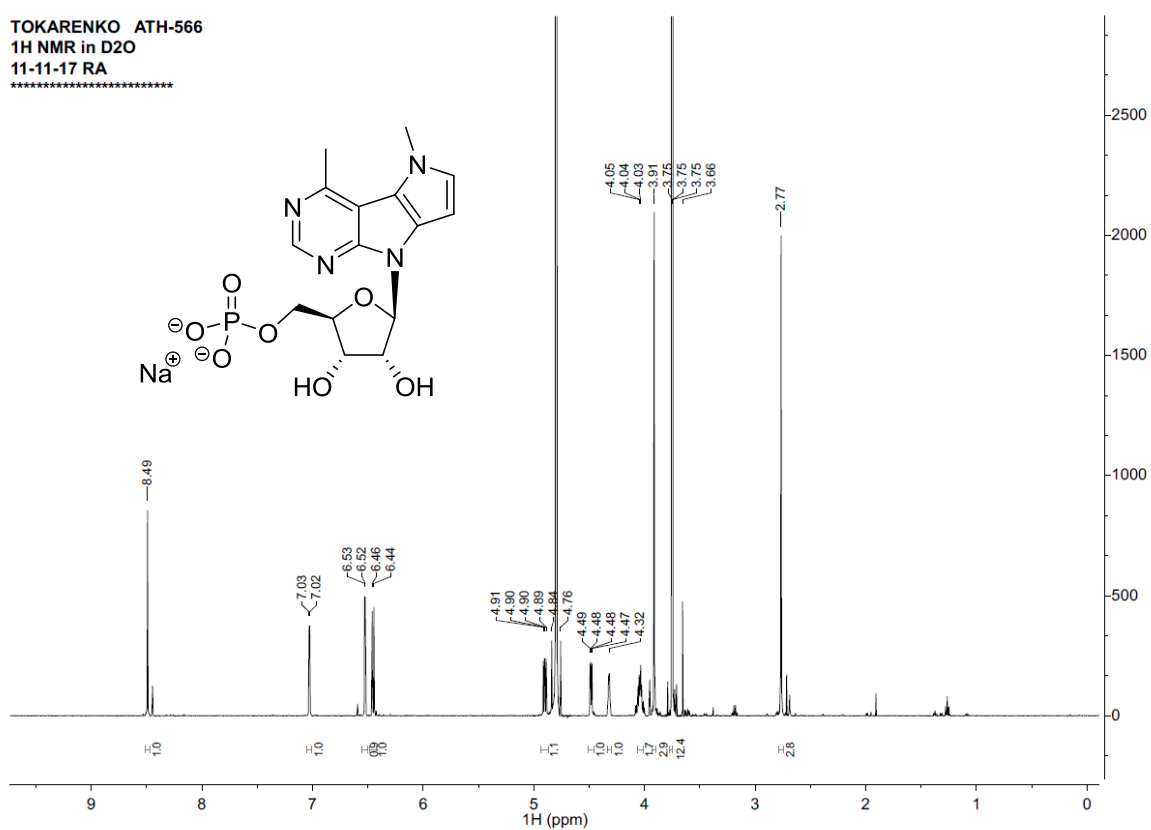

TOKARENKO ATH-566

APT in D<sub>2</sub>O

11-11-17 RA

\*\*\*\*\*

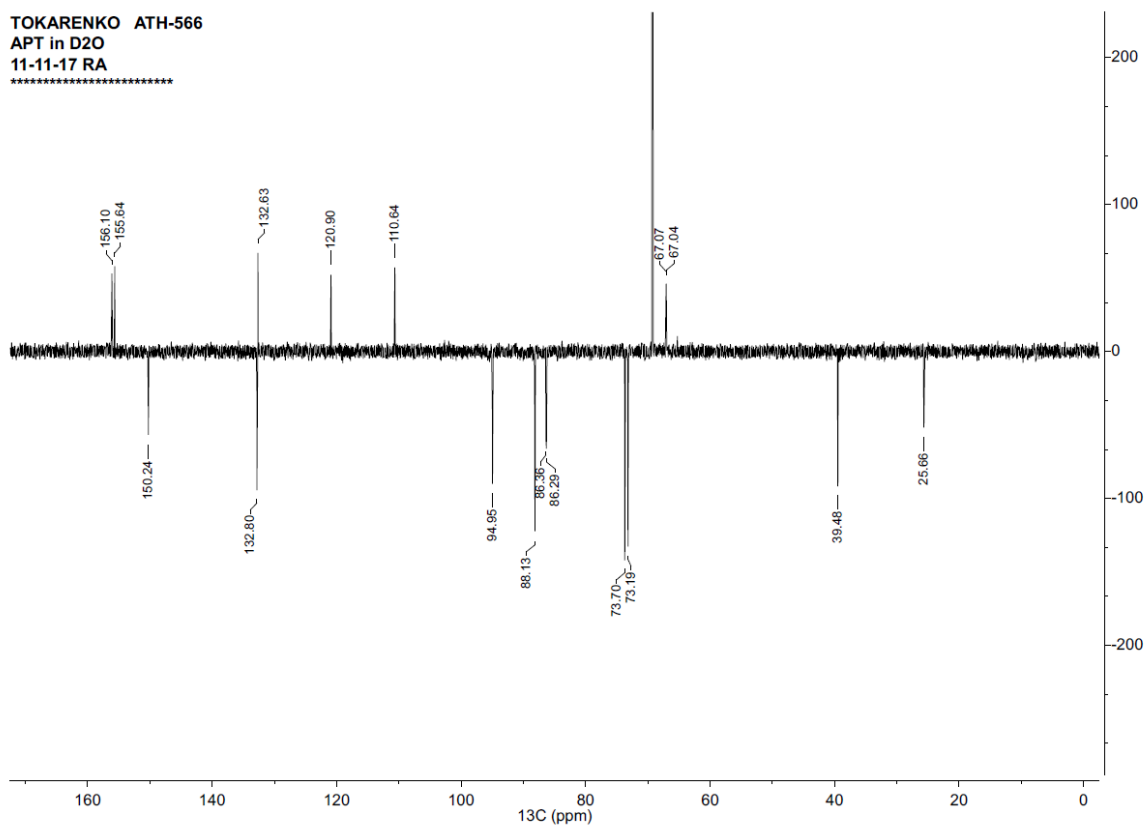

TOKARENKO ATH-566  
31P{1H} NMR in D2O  
11-11-17 RA  
\*\*\*\*\*

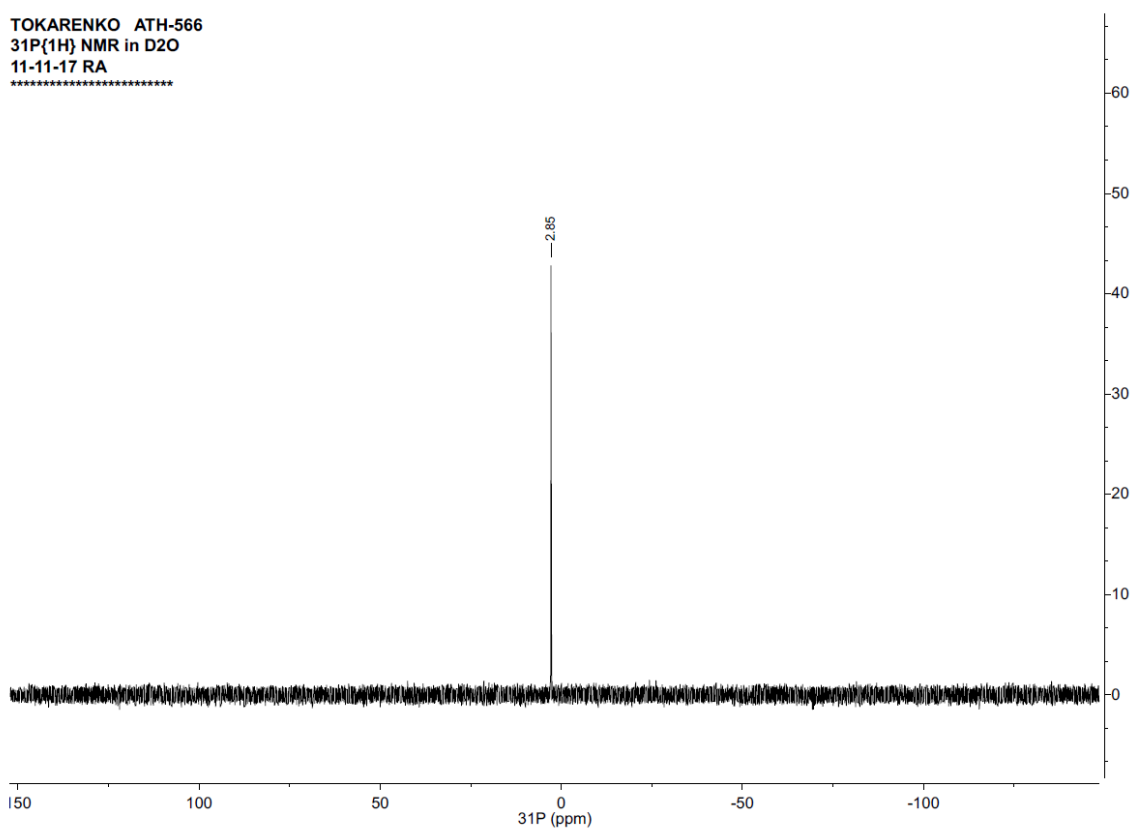

# NMR spectra of compound **22e**

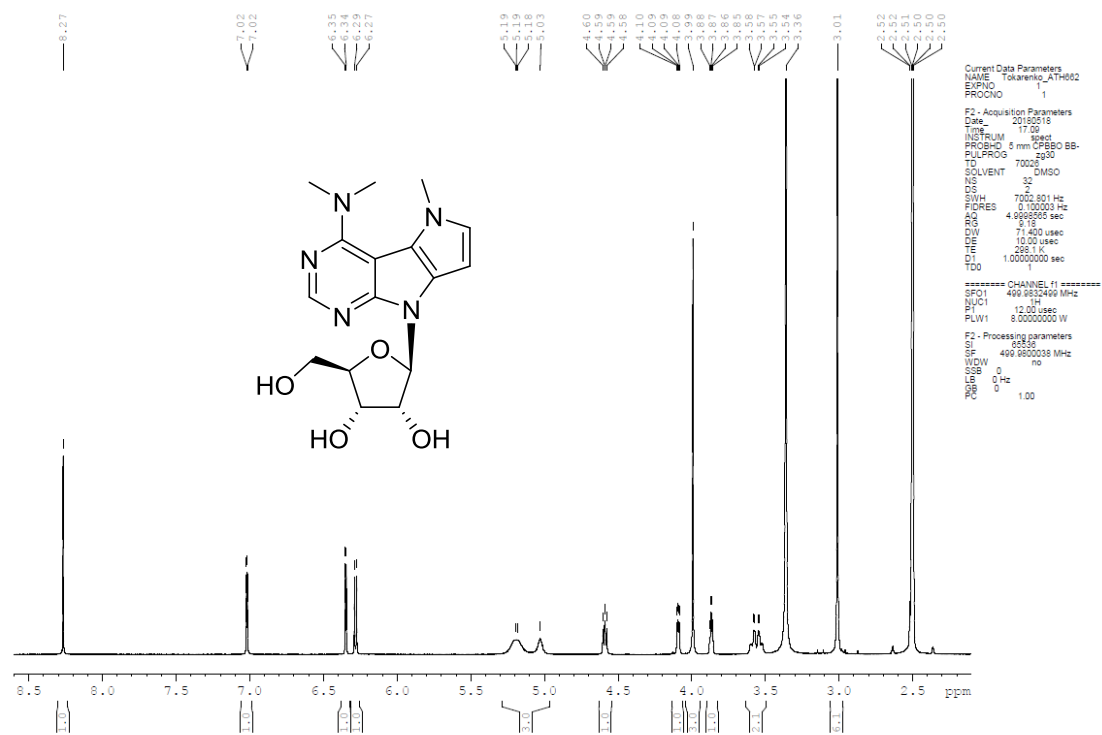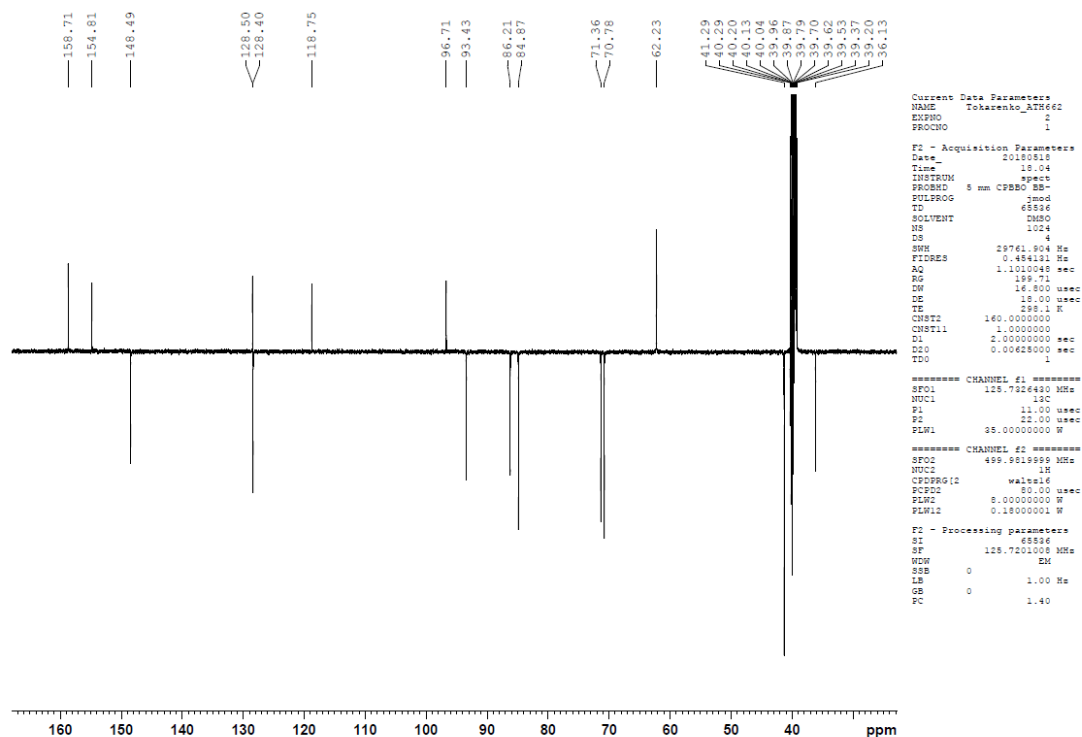



# NMR spectra of compound **22f**

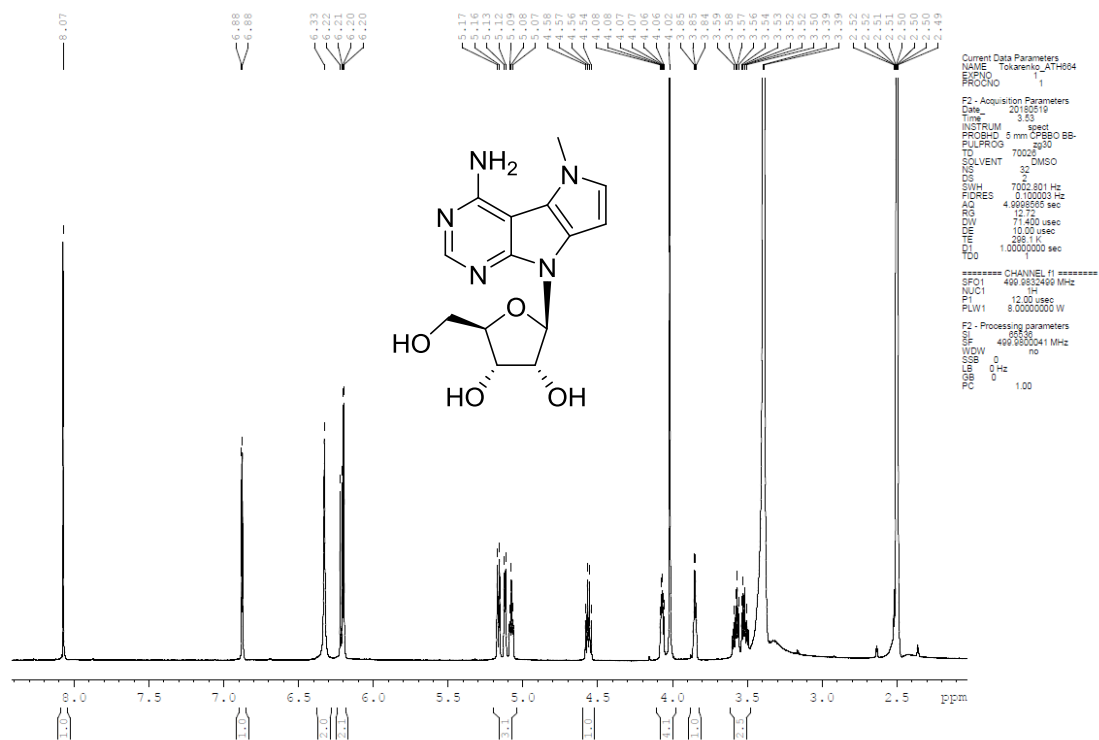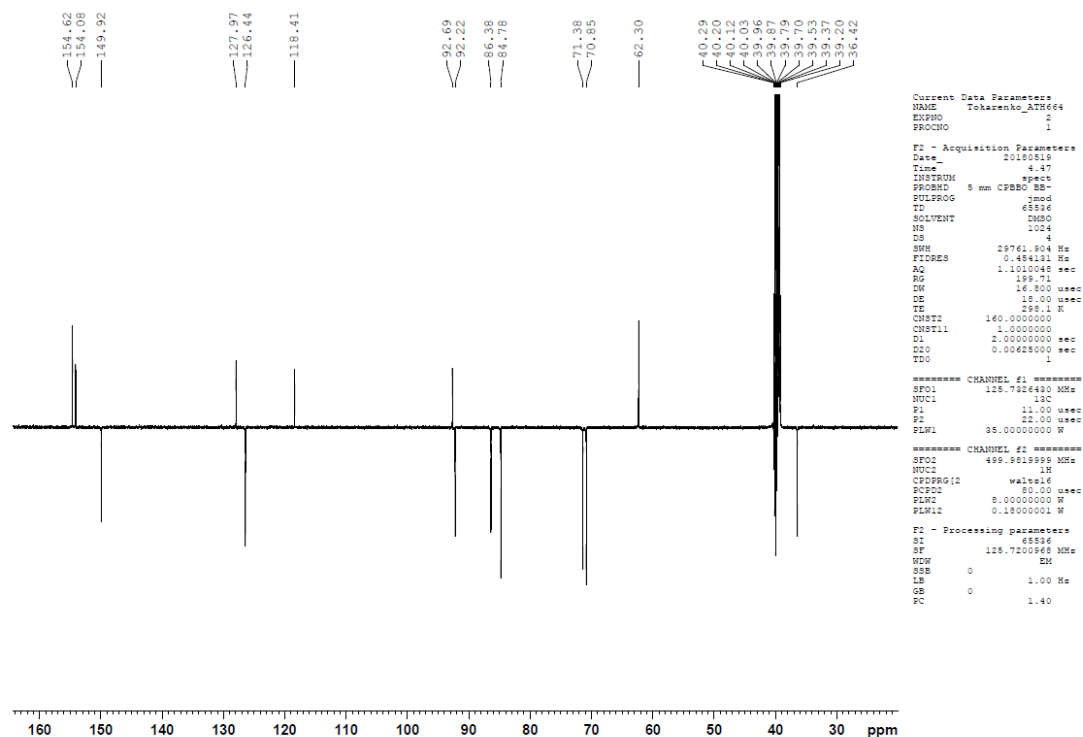

# NMR spectra of compound **22g**

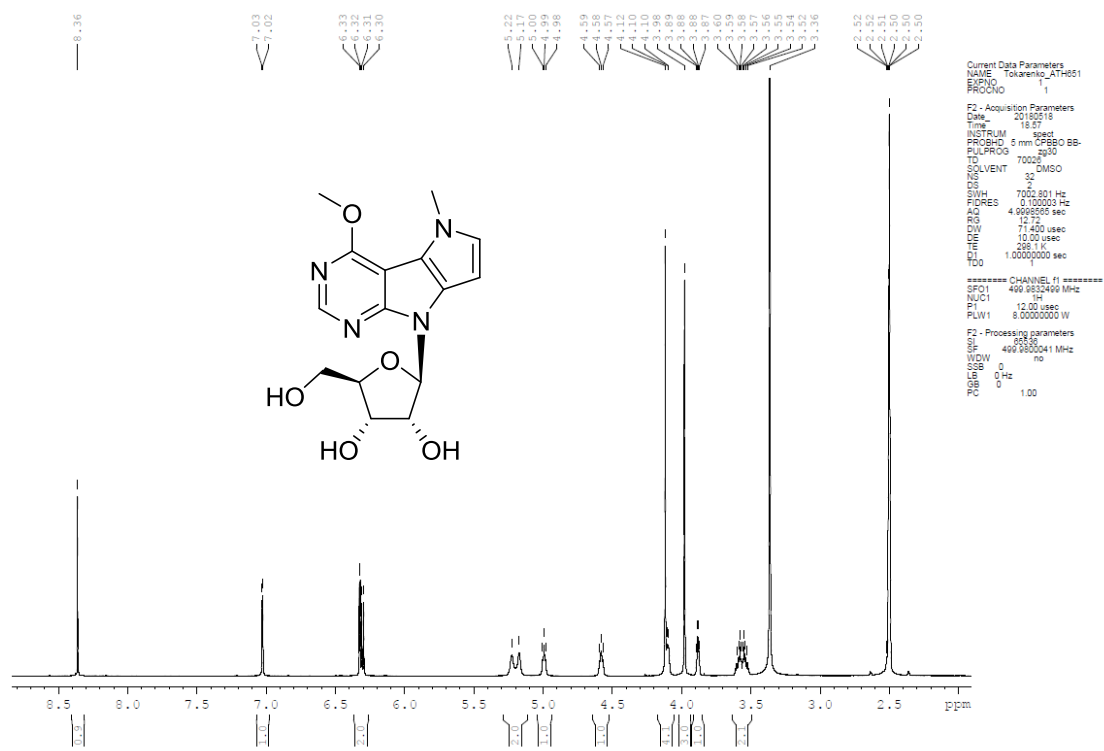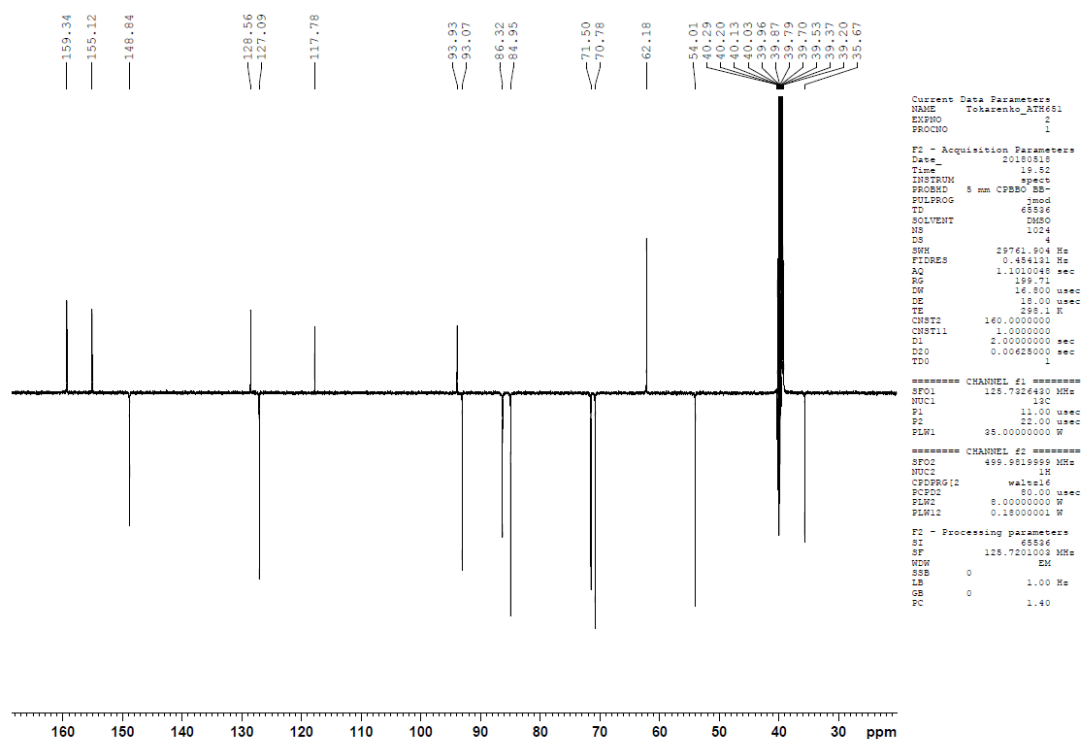

# NMR spectra of compound **22h**

TOKARENKO ATH-437  
 1H NMR in DMSO-d6  
 30-01-18 RA  
 \*\*\*\*\*

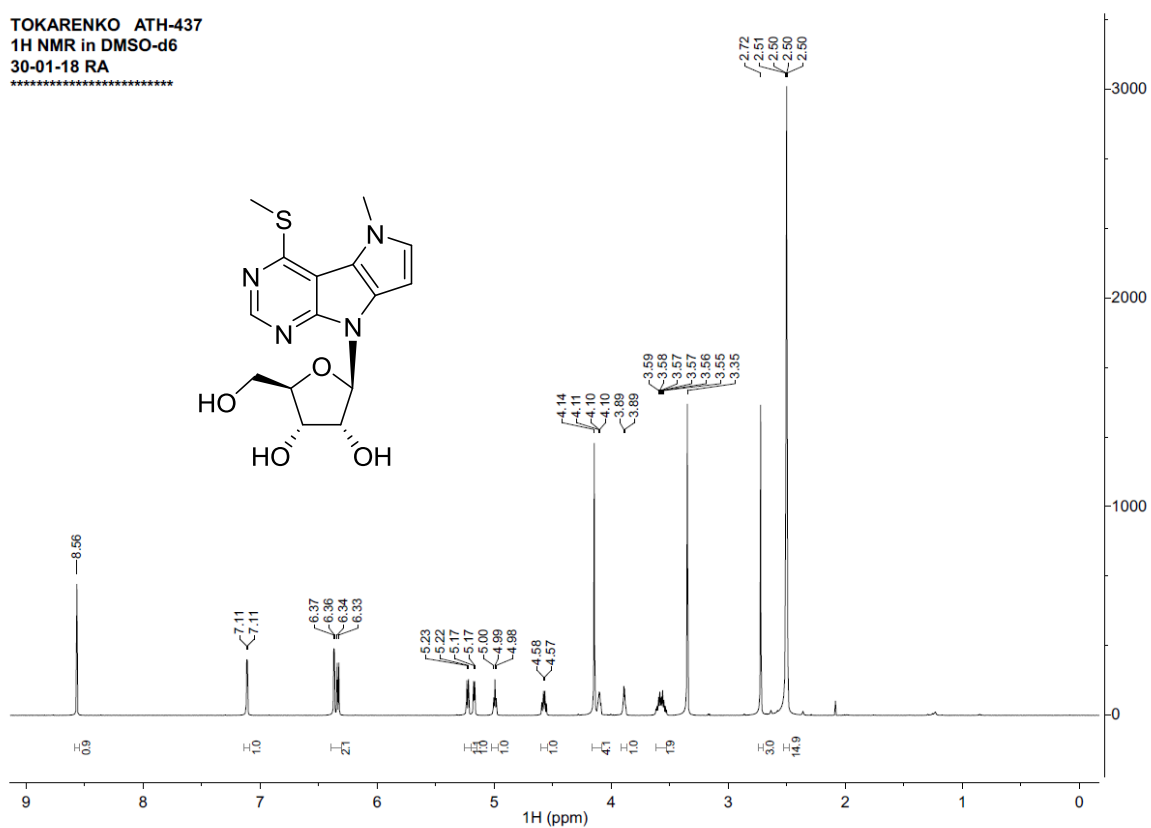

TOKARENKO ATH-437  
 APT in DMSO-d6  
 30-01-18 RA  
 \*\*\*\*\*

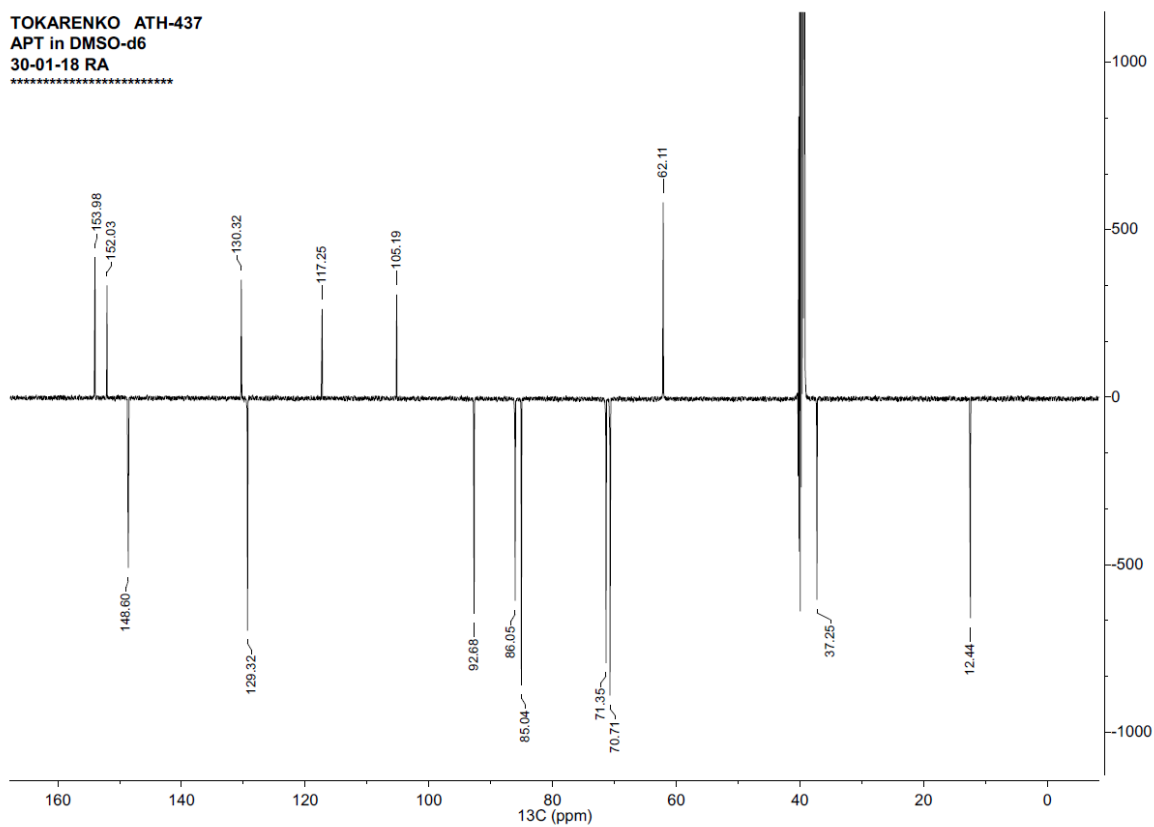

# NMR spectra of compound **22i**

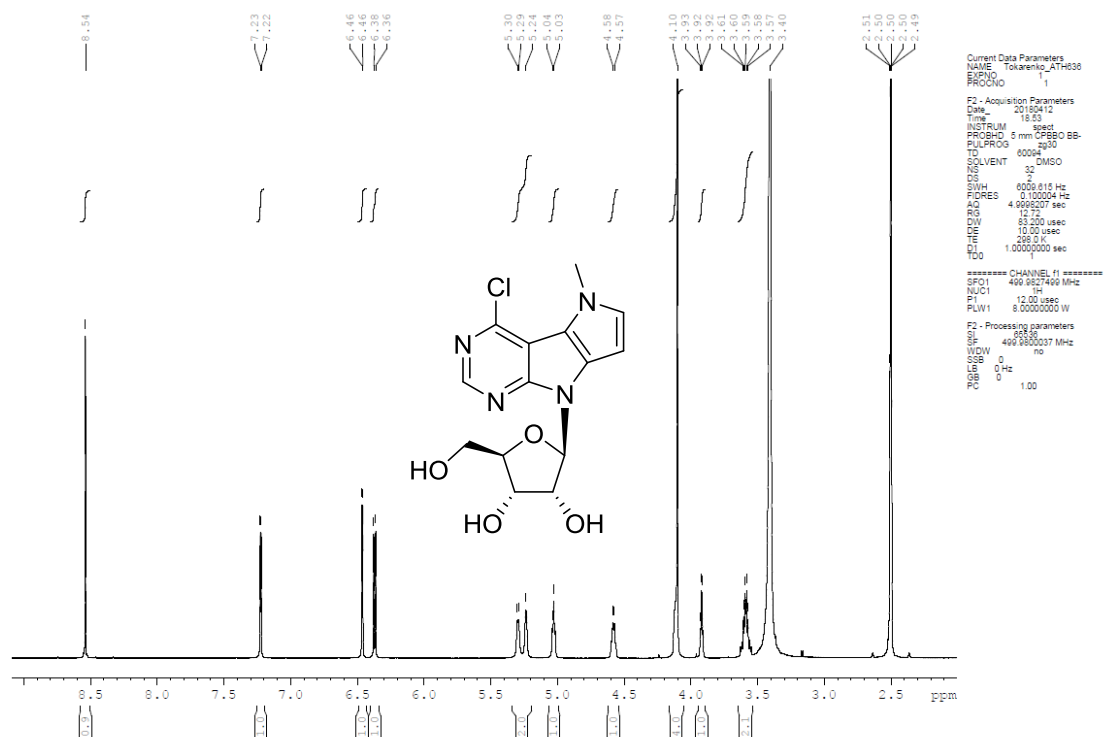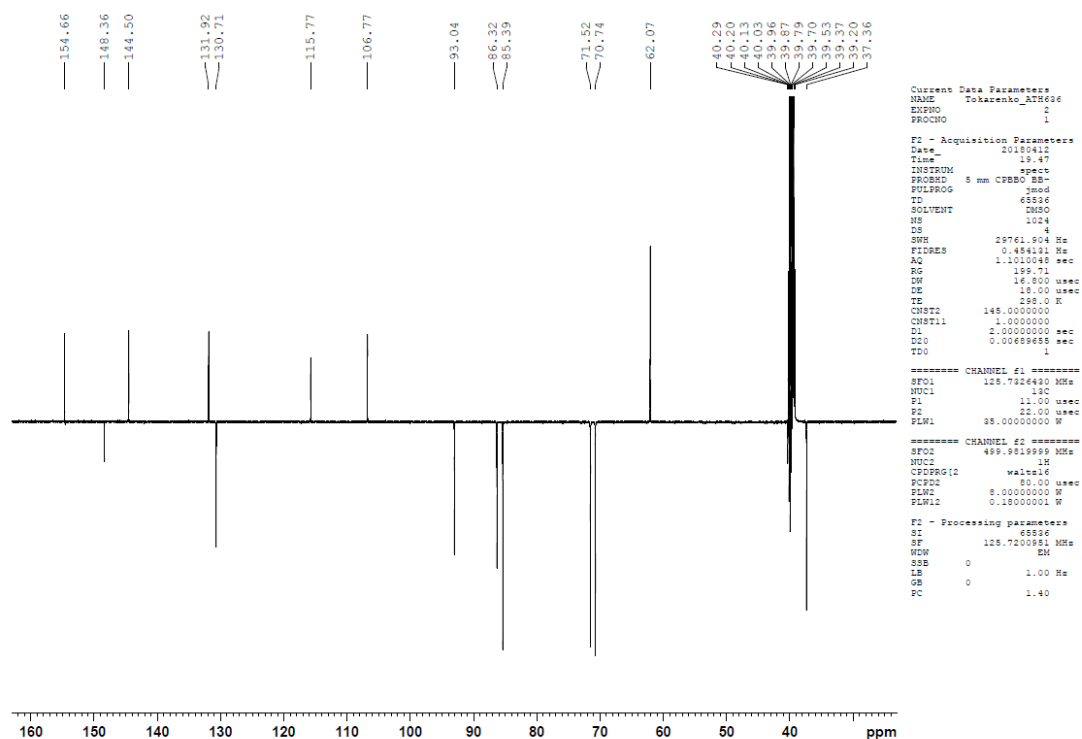

## S37

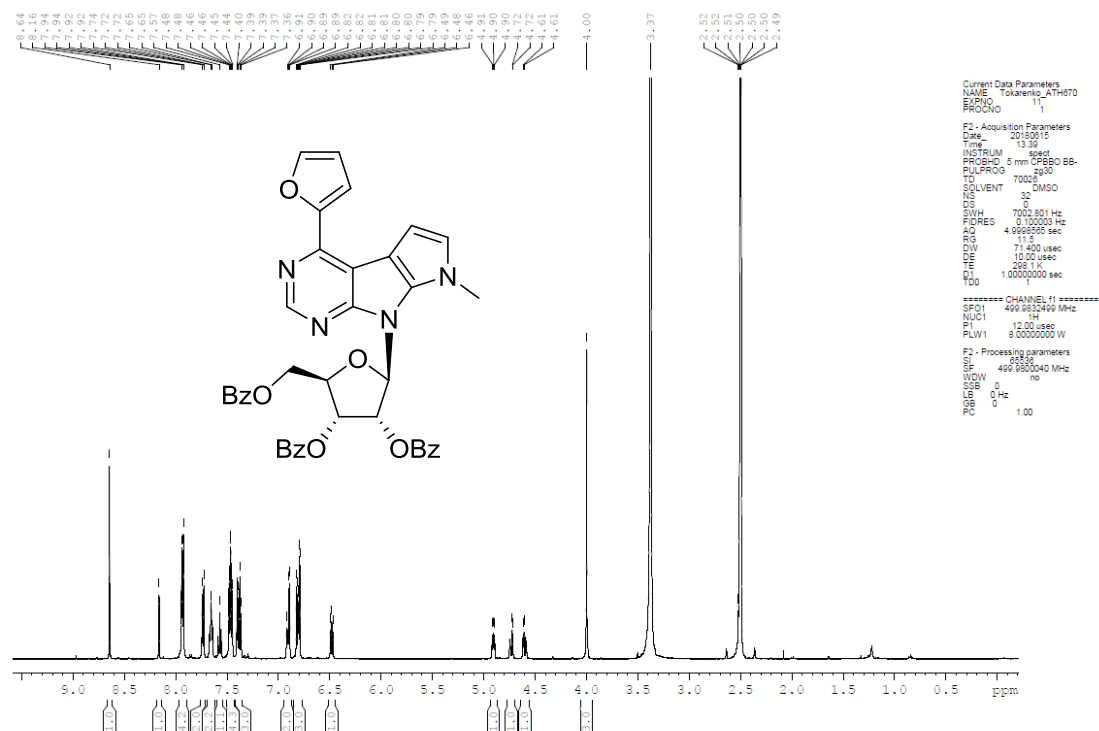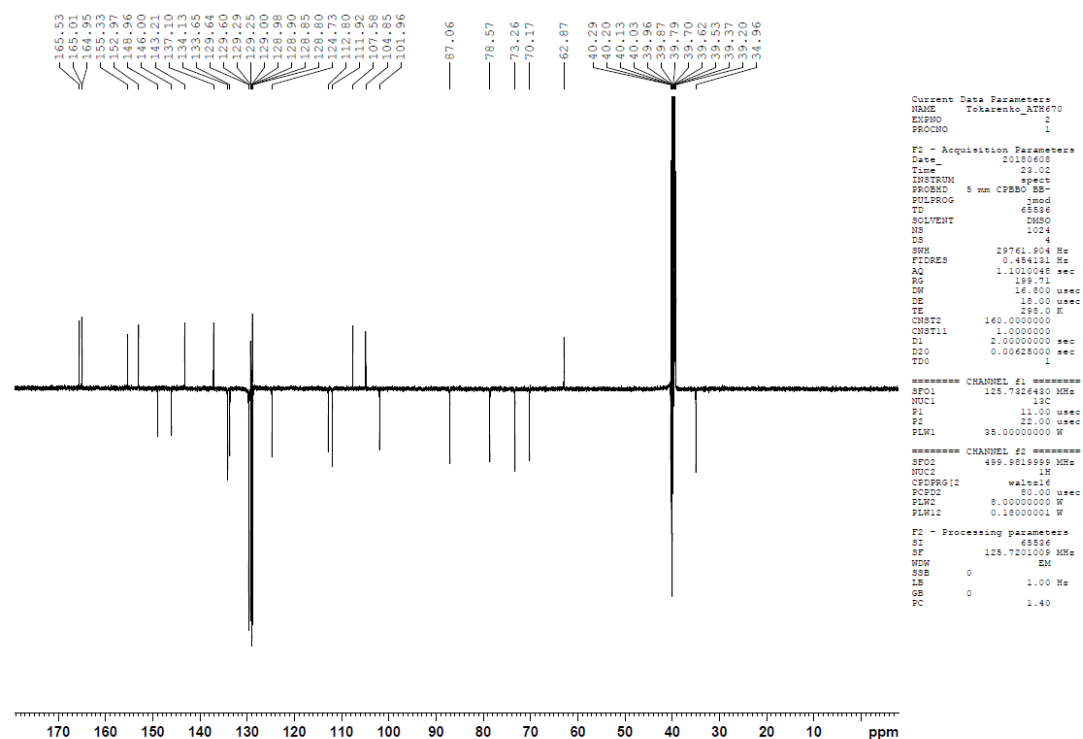

## S38

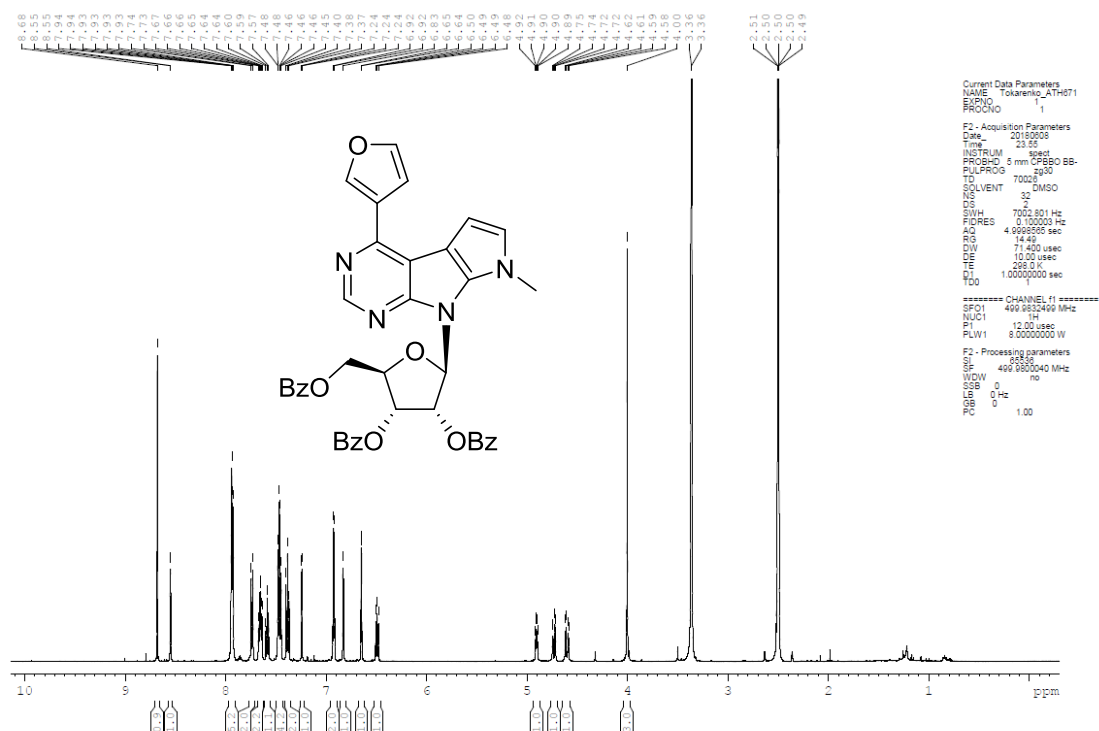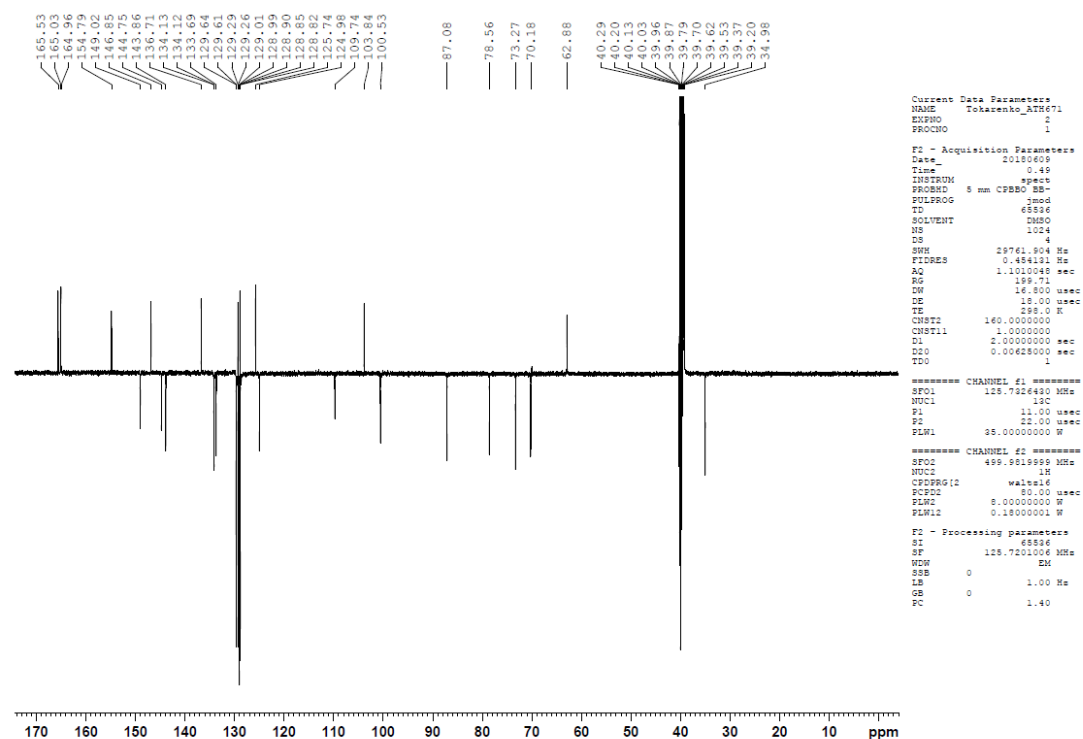

# NMR spectra of compound **23c**

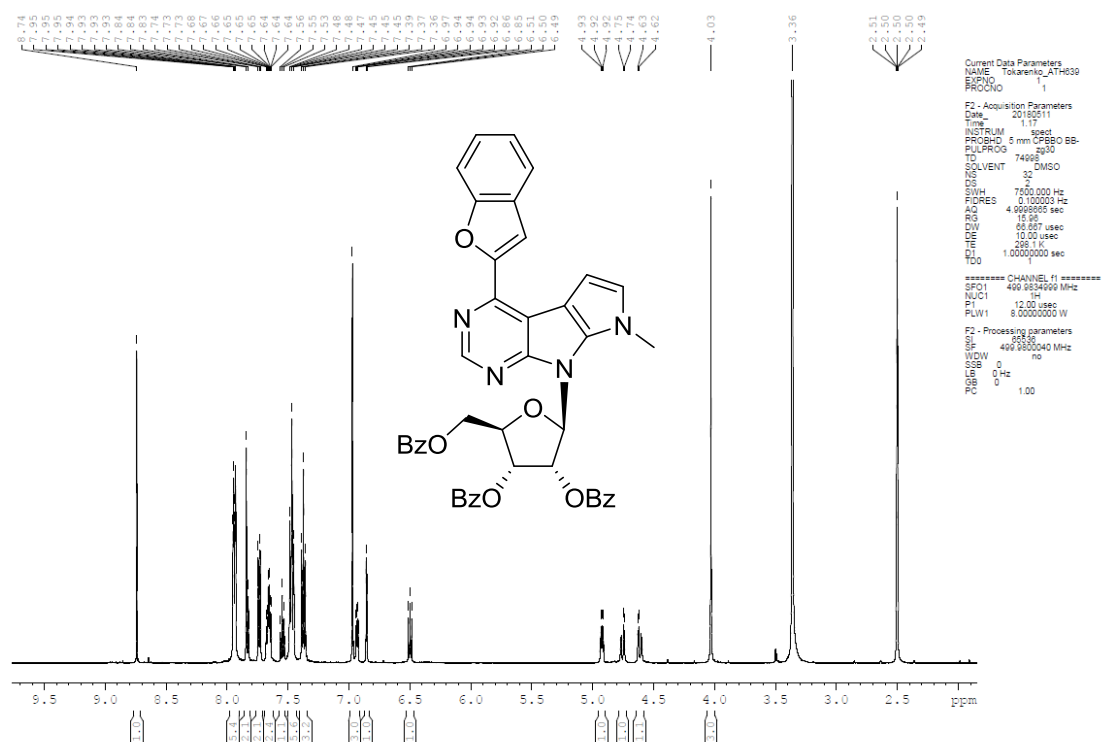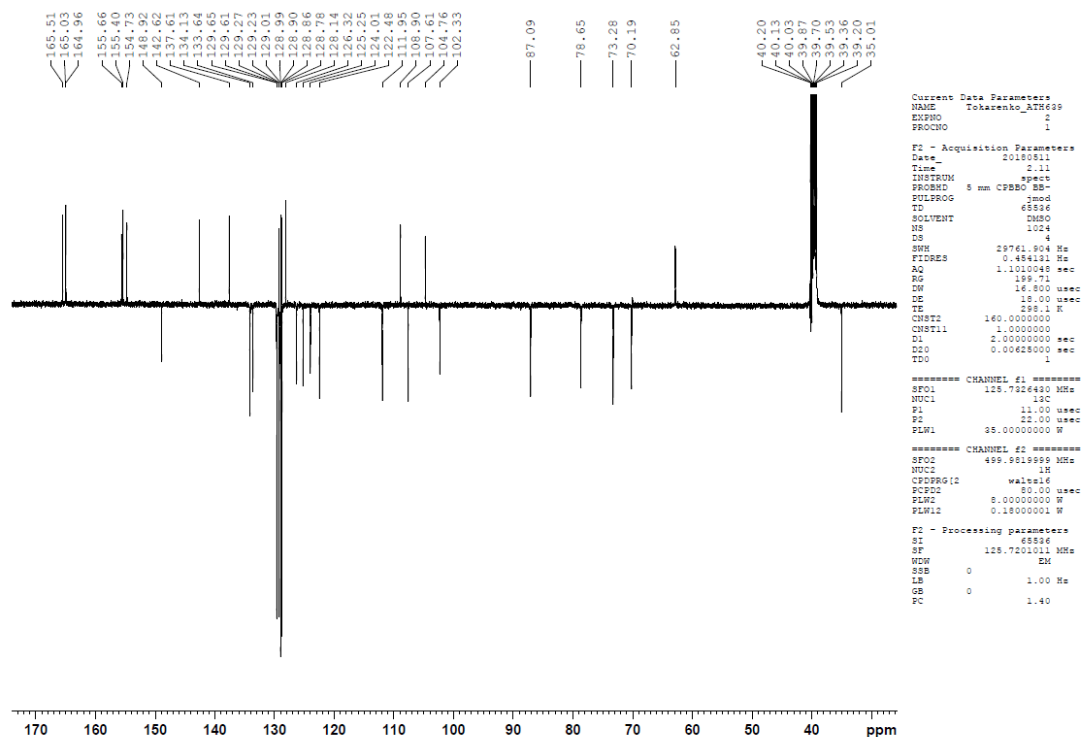

# NMR spectra of compound **23d**

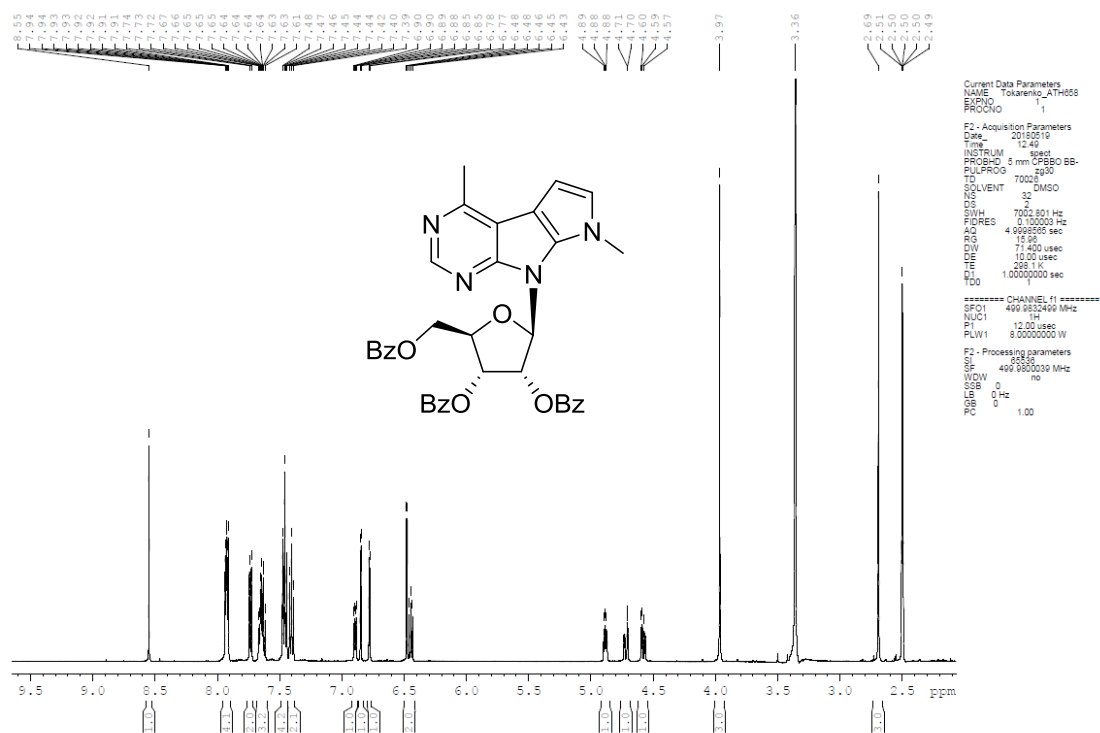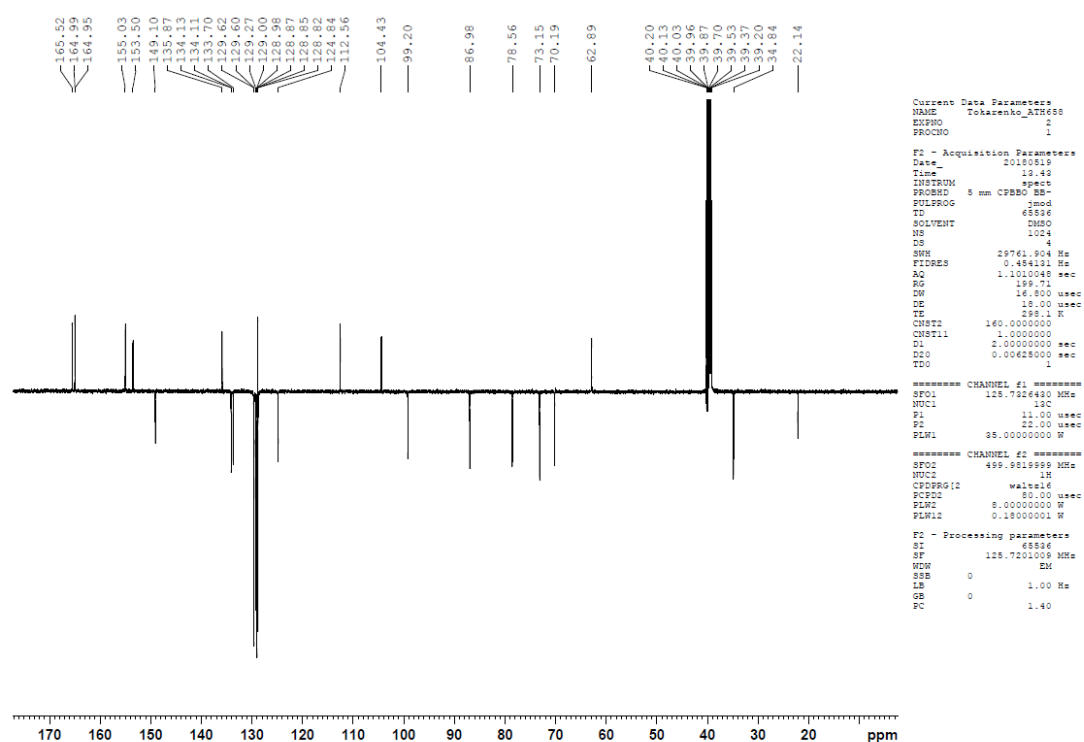



# NMR spectra of compound **23e**

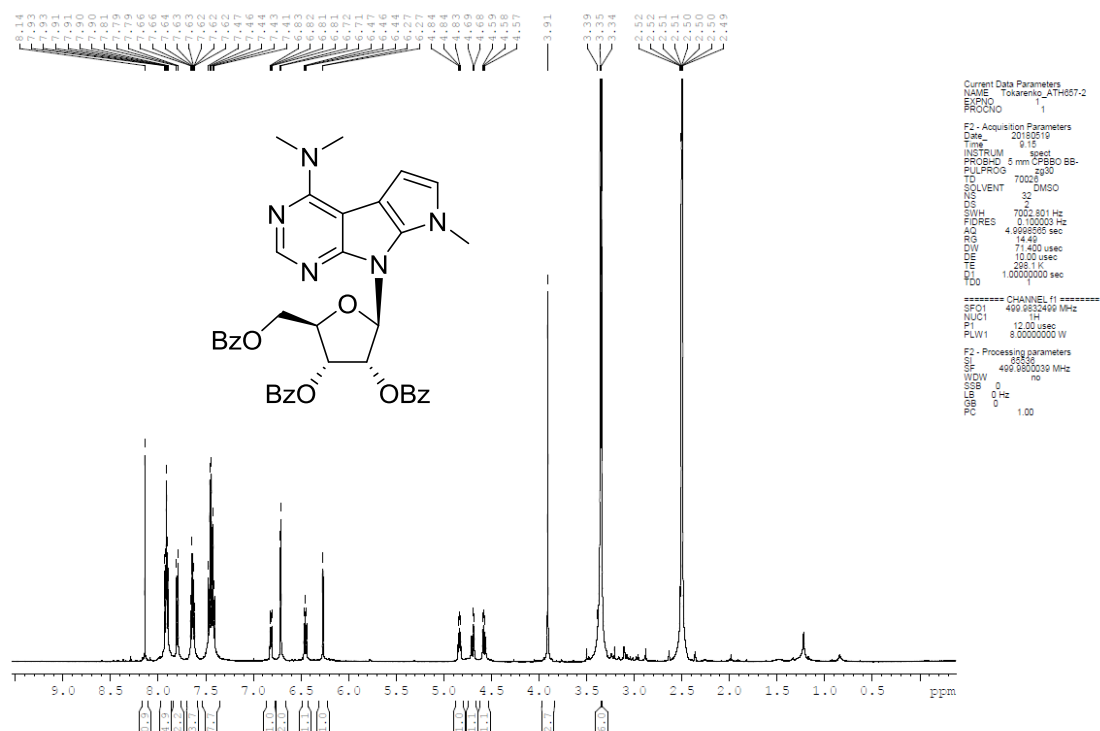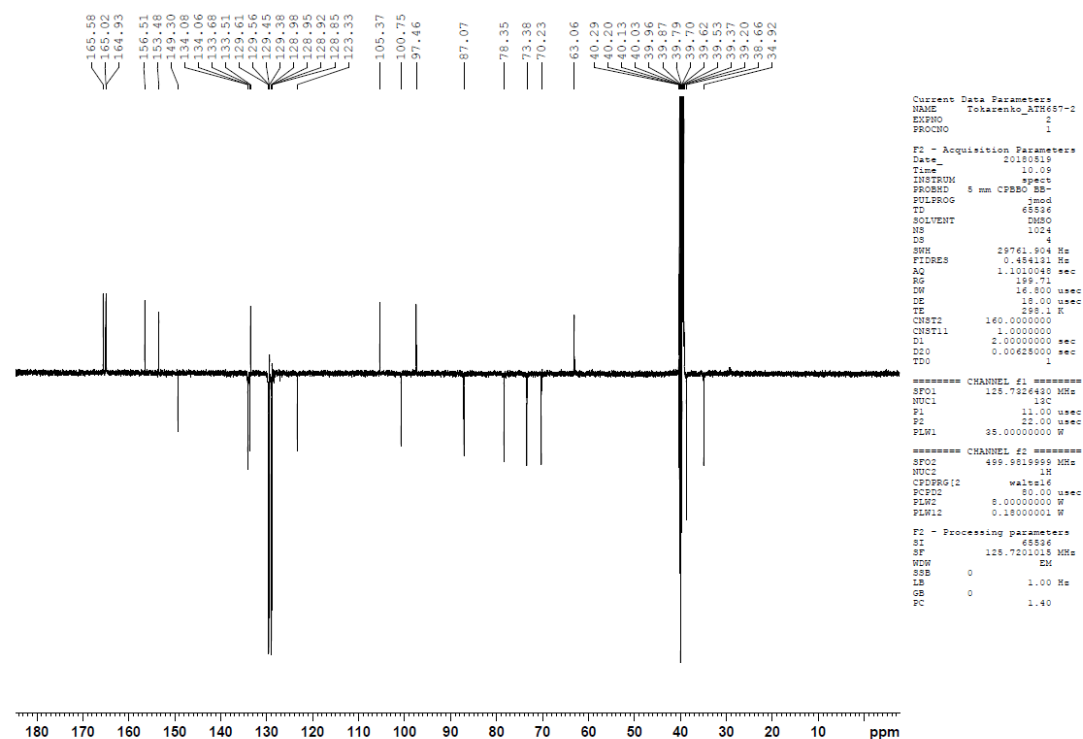

# NMR spectra of compound **24a**

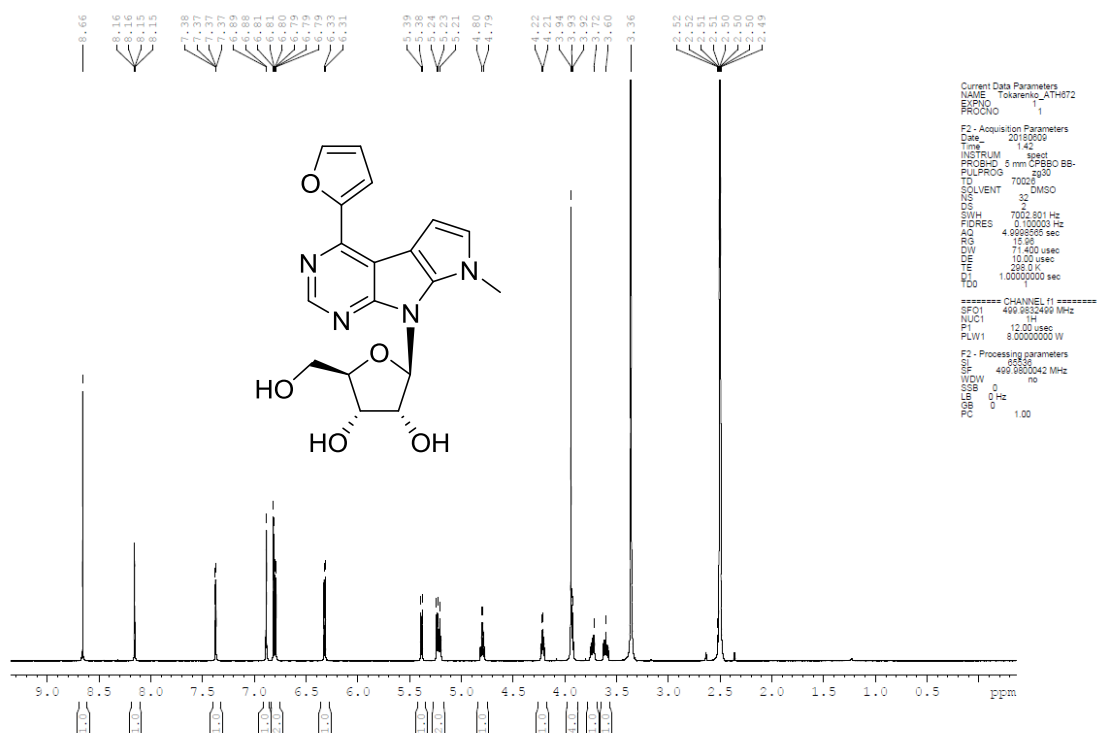

## S43

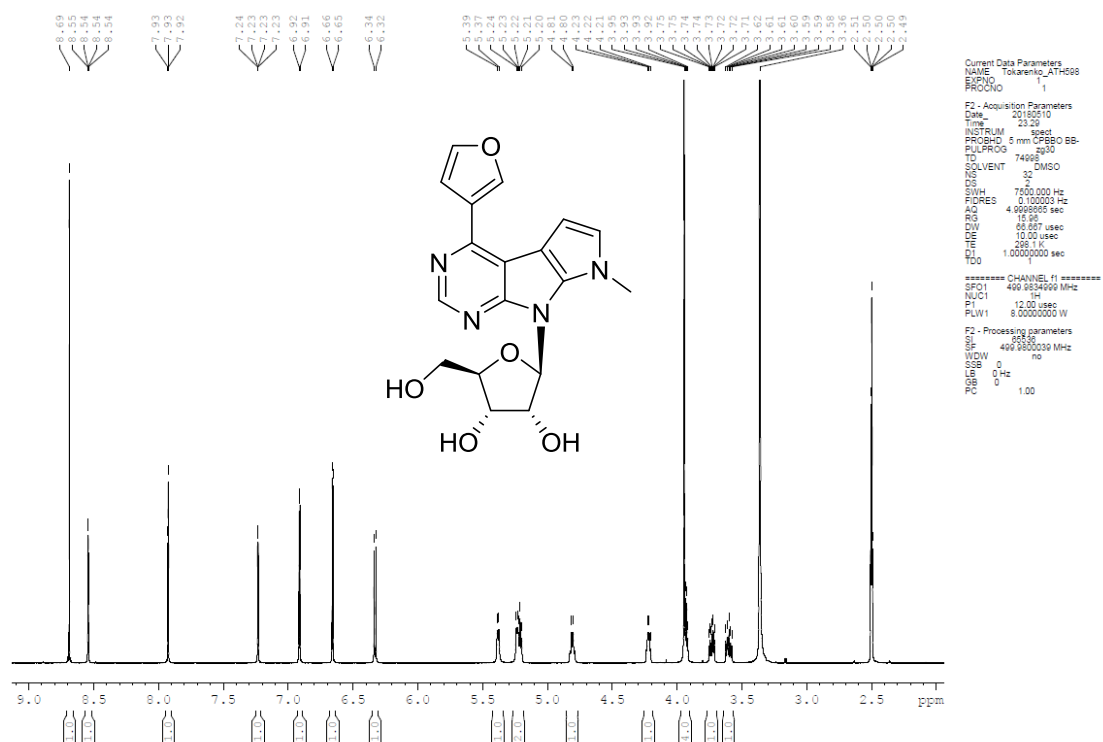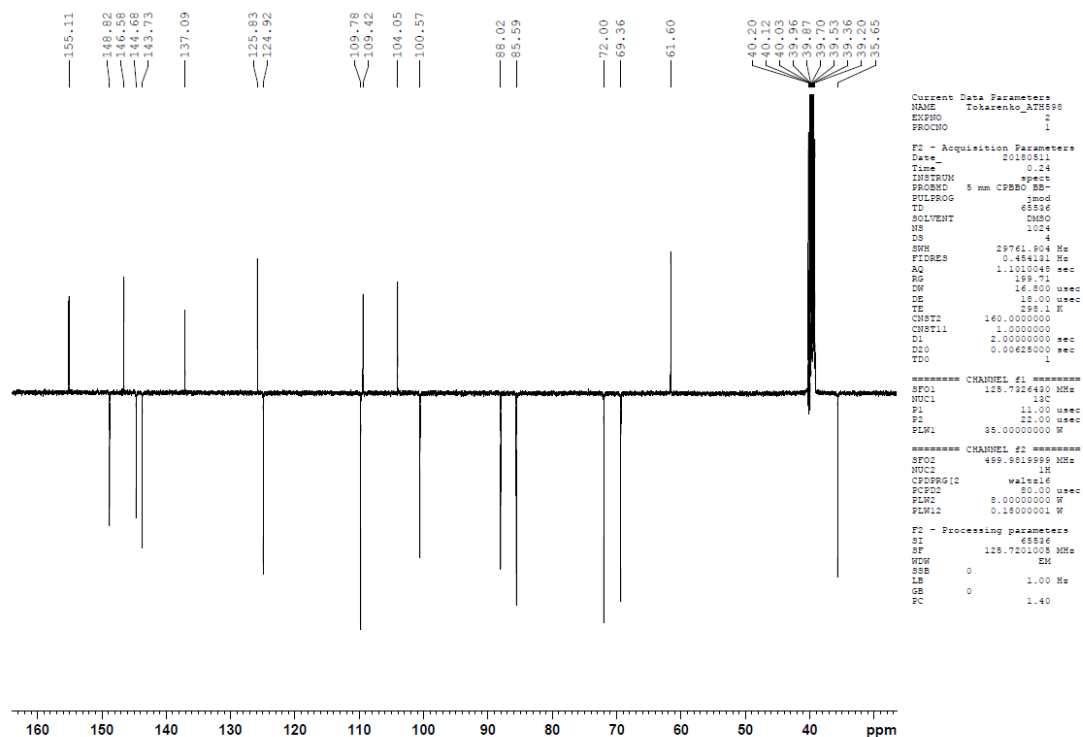

# NMR spectra of compound **24c**

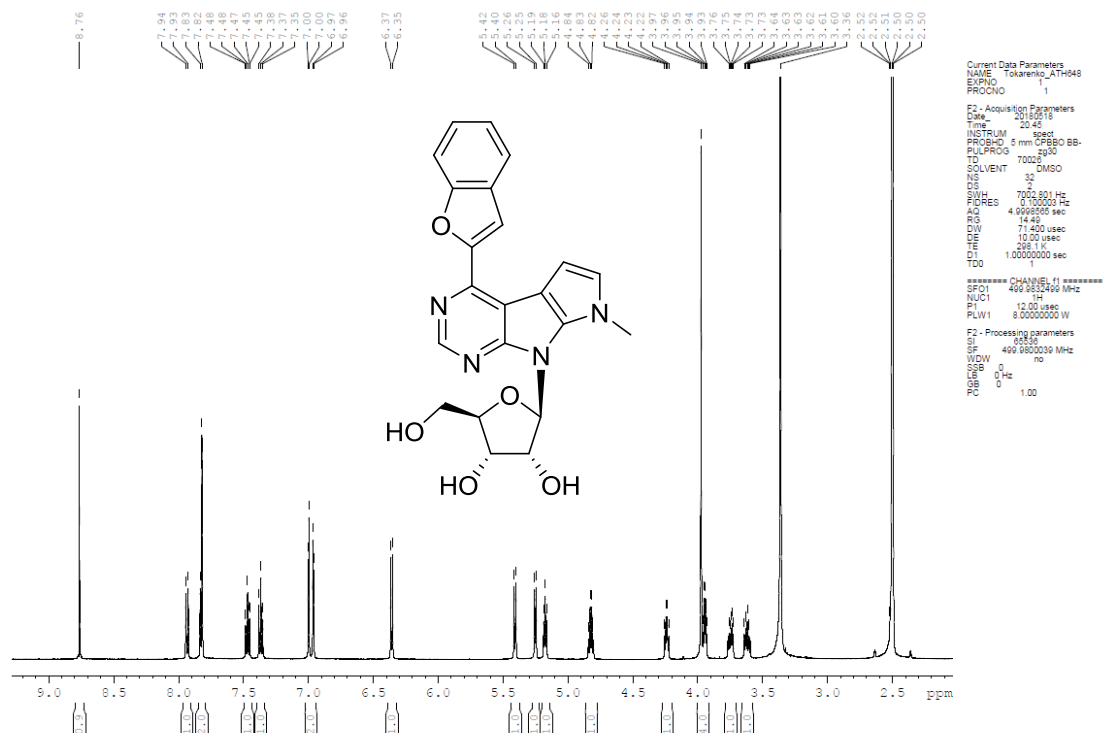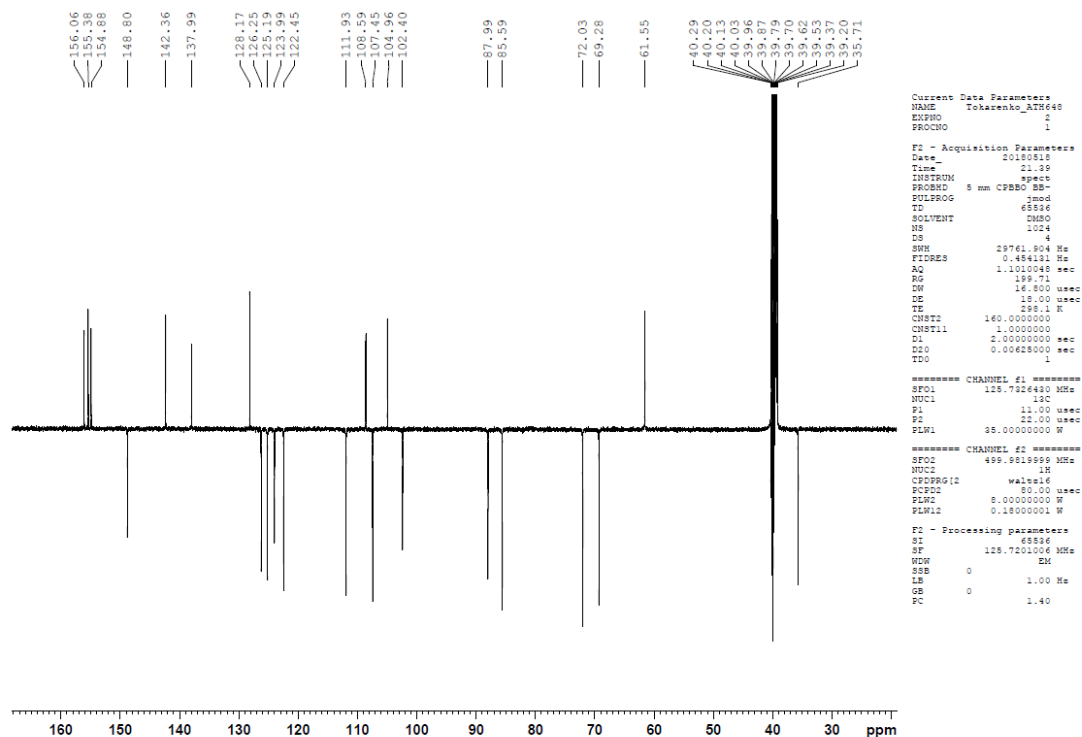

# NMR spectra of compound **24d**

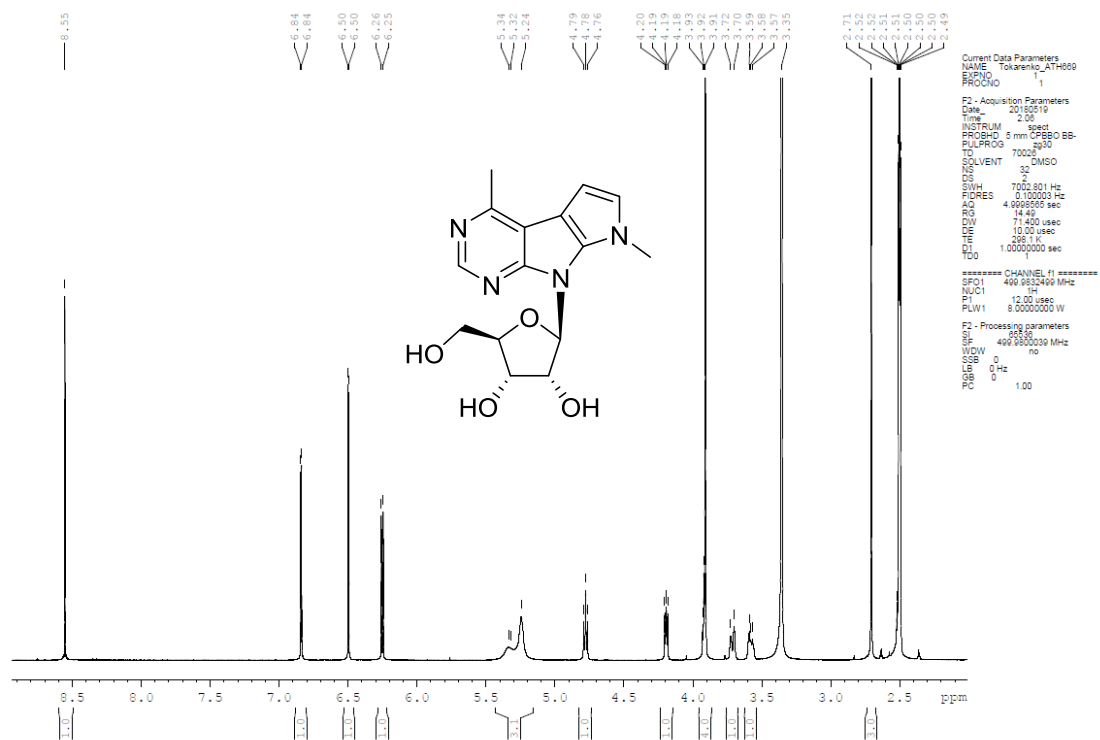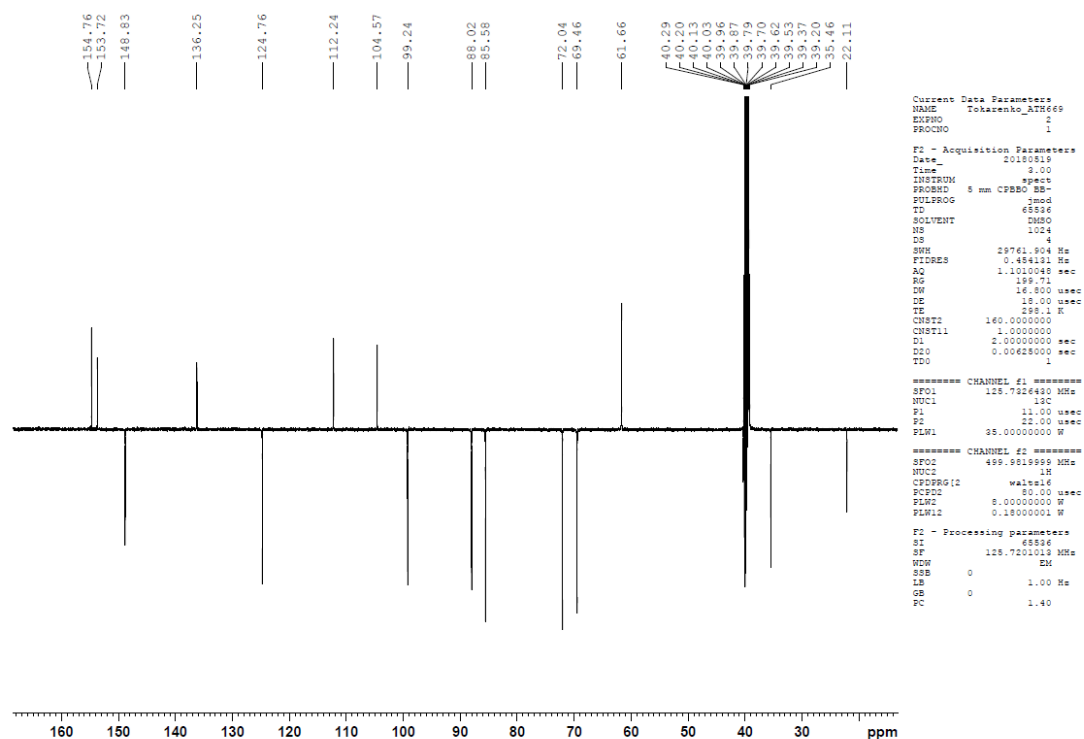

# NMR spectra of compound **24e**

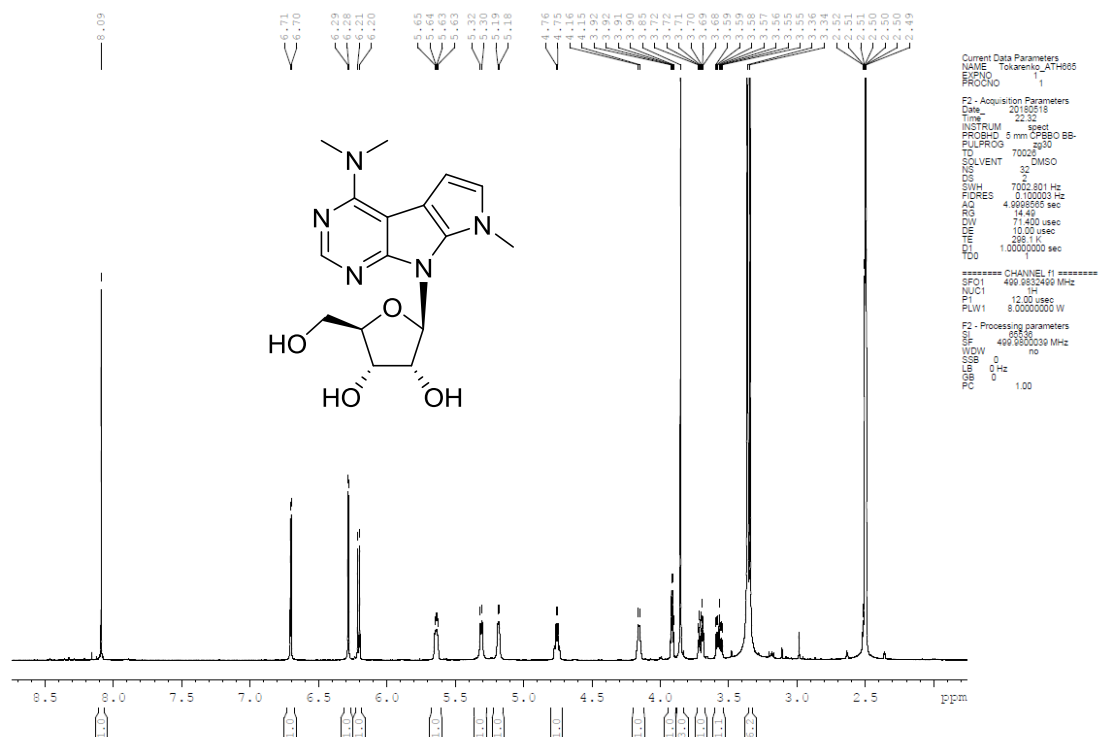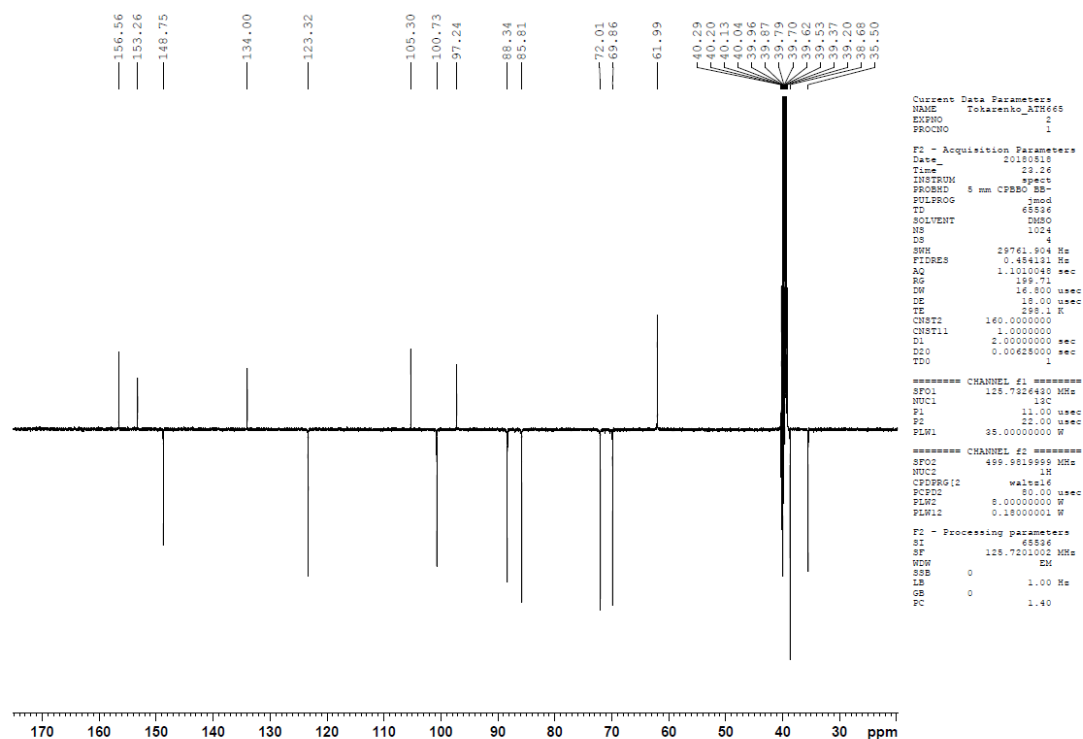

## S47

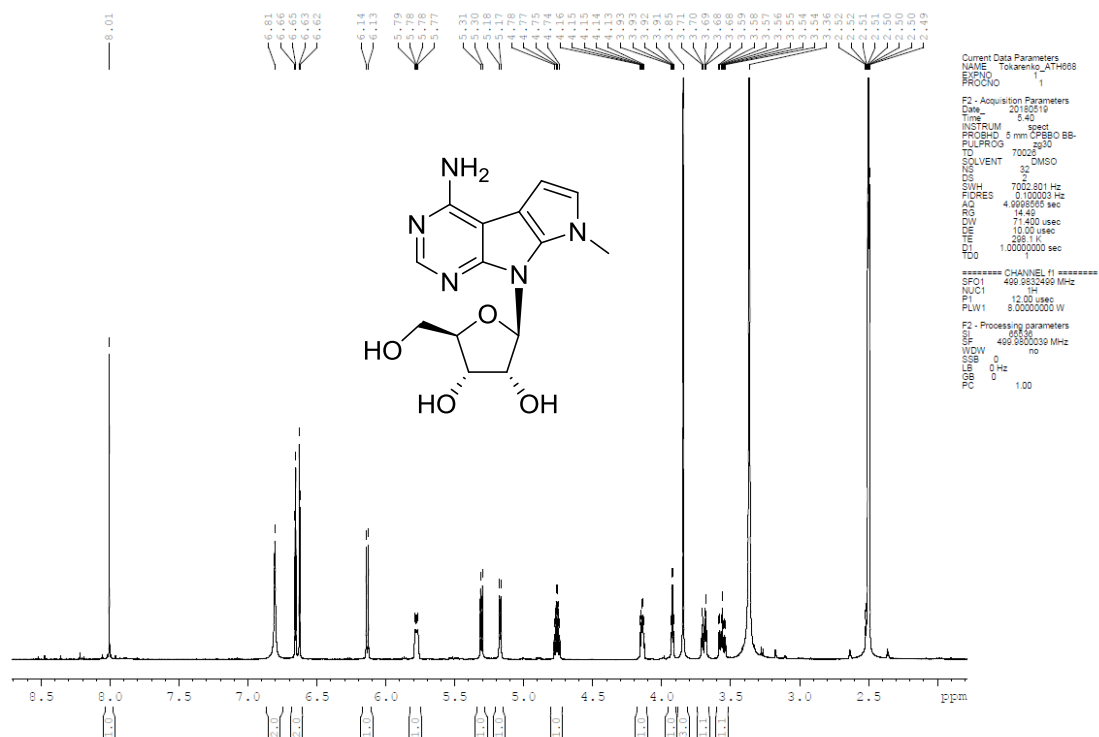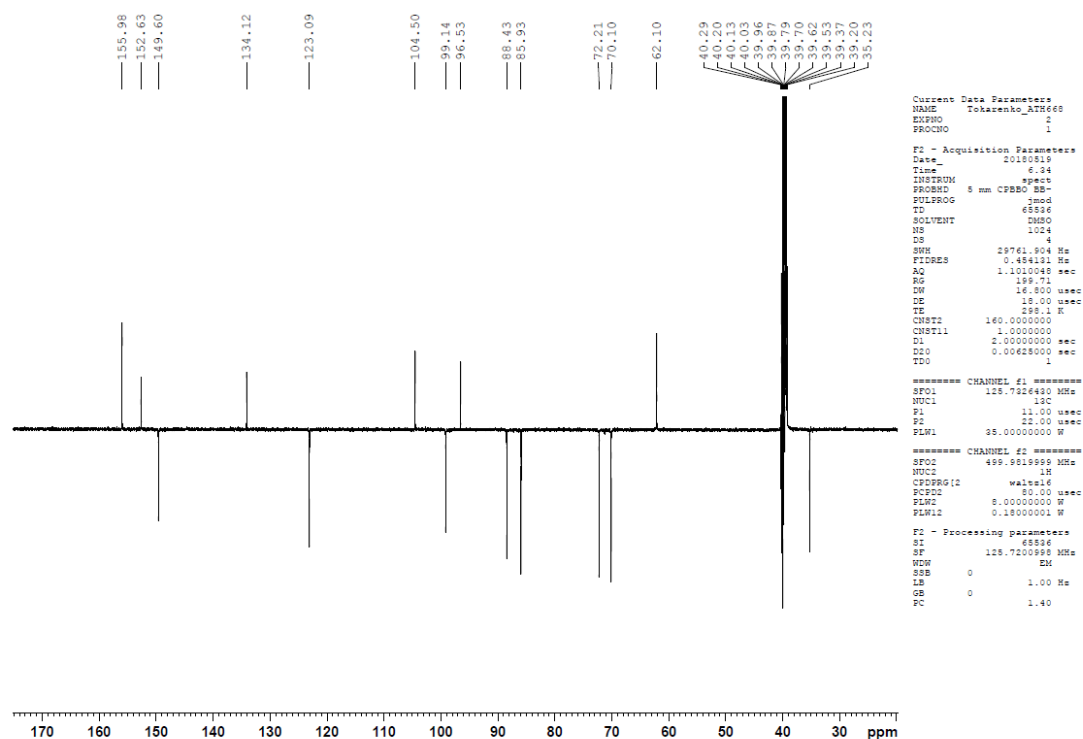

# NMR spectra of compound **24g**

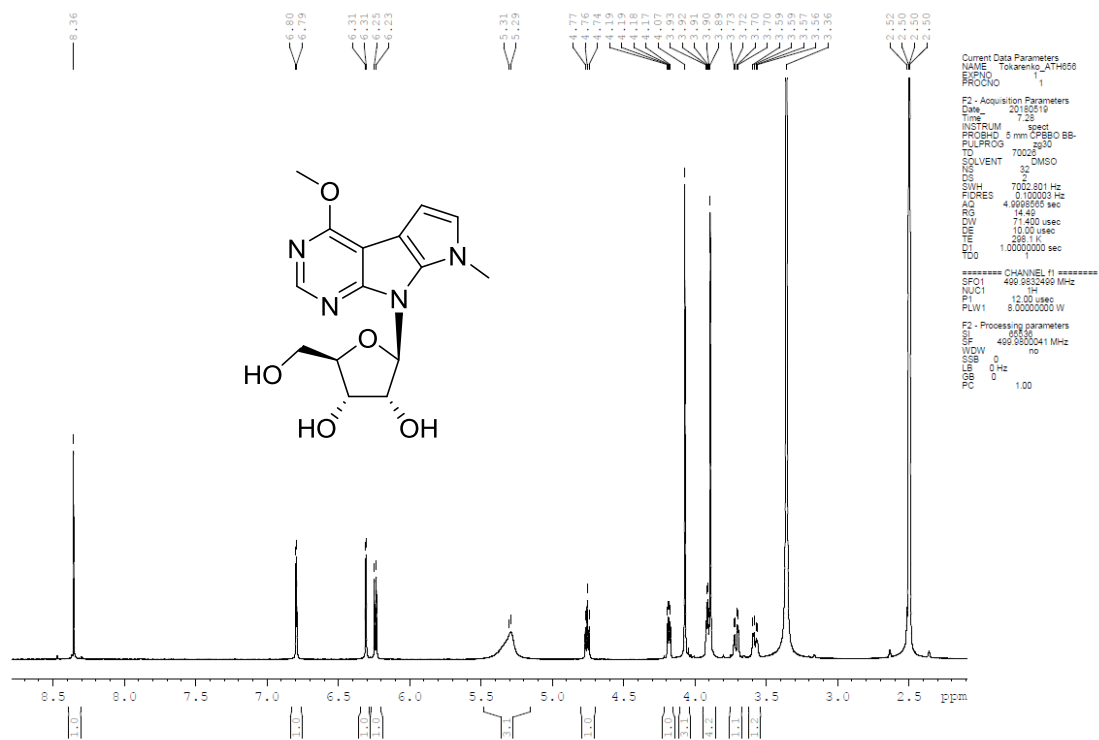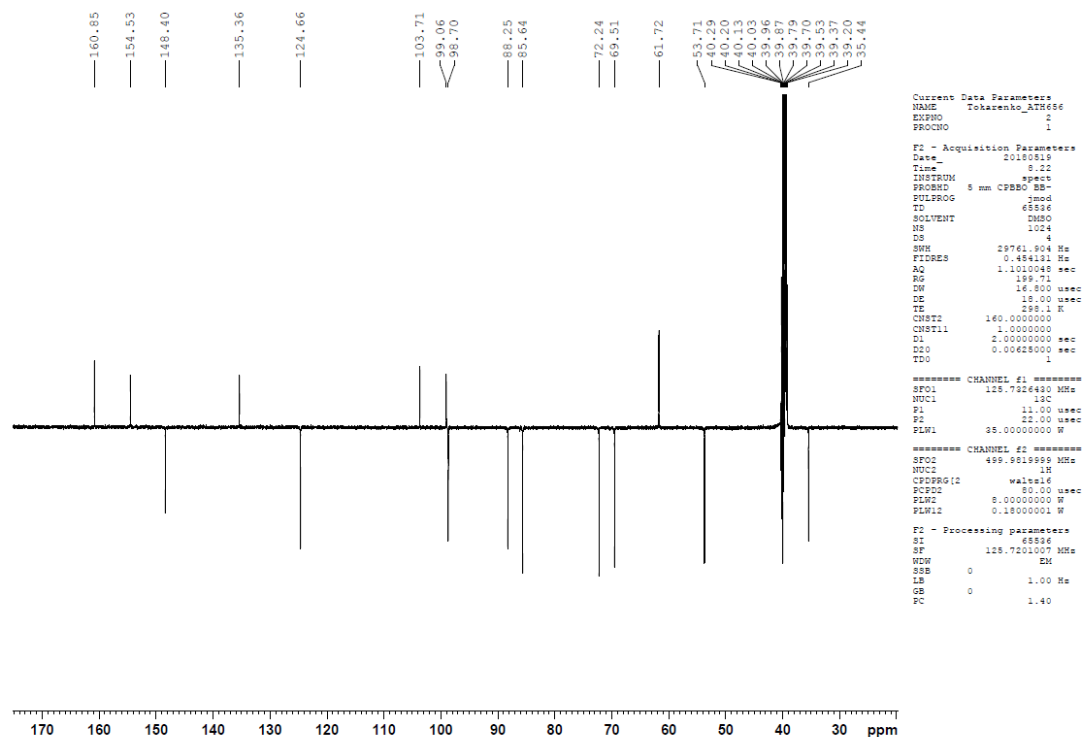



# NMR spectra of compound **24h**

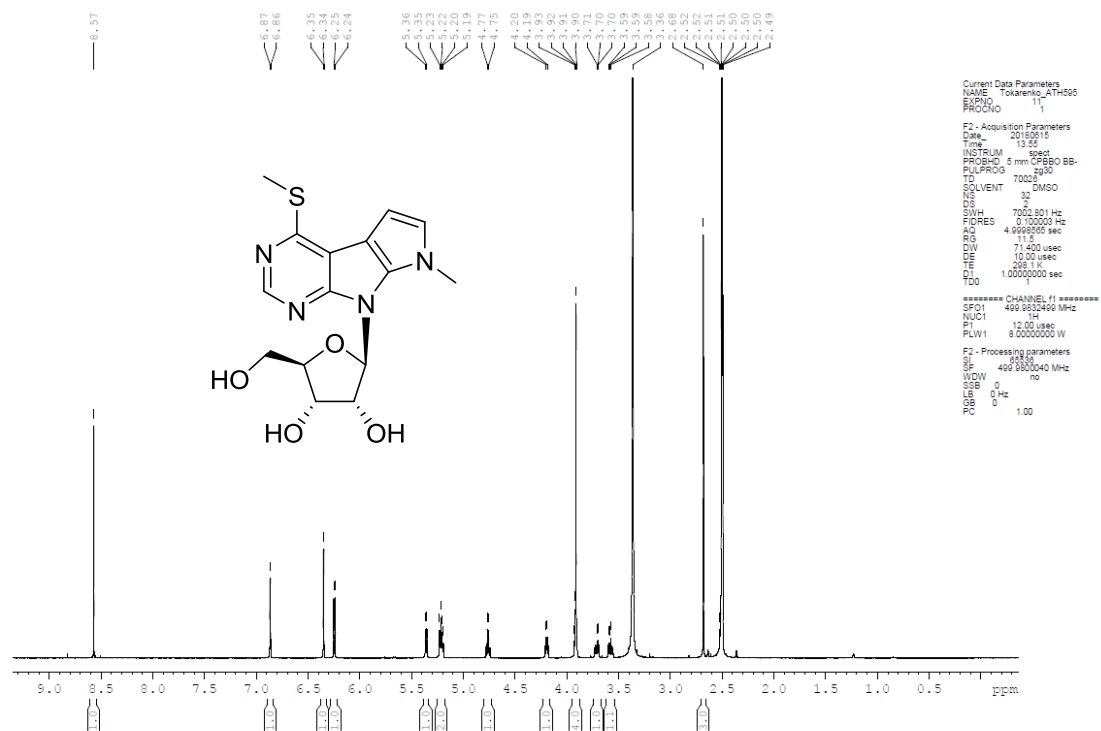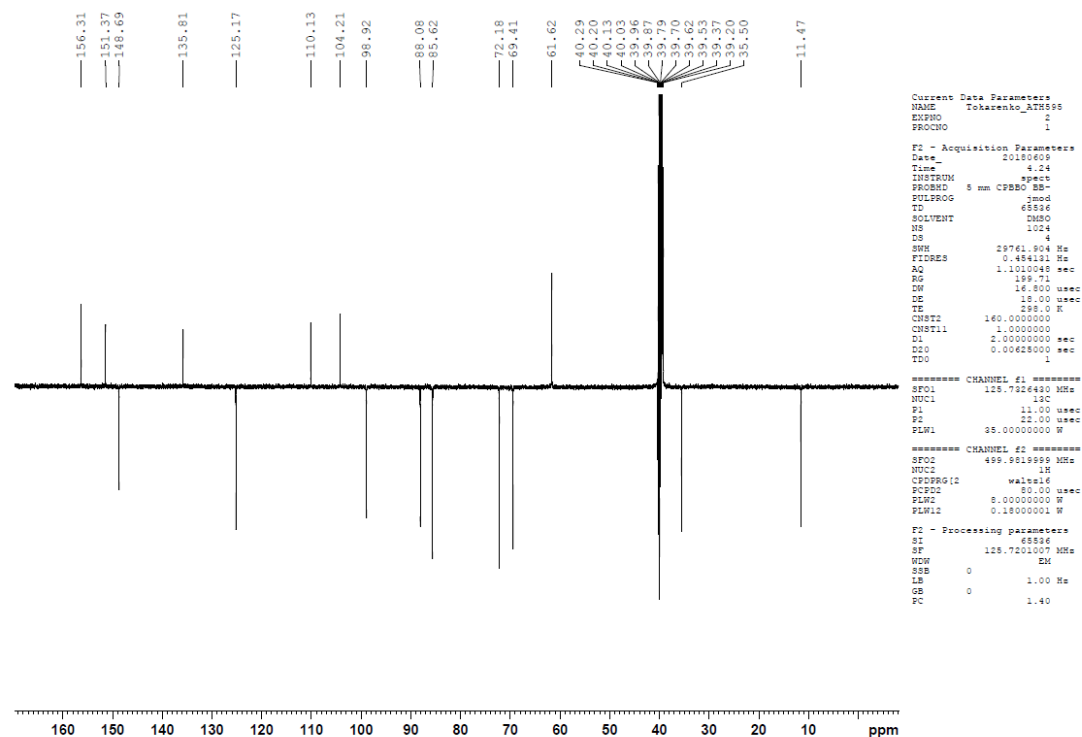

# NMR spectra of compound **24i**

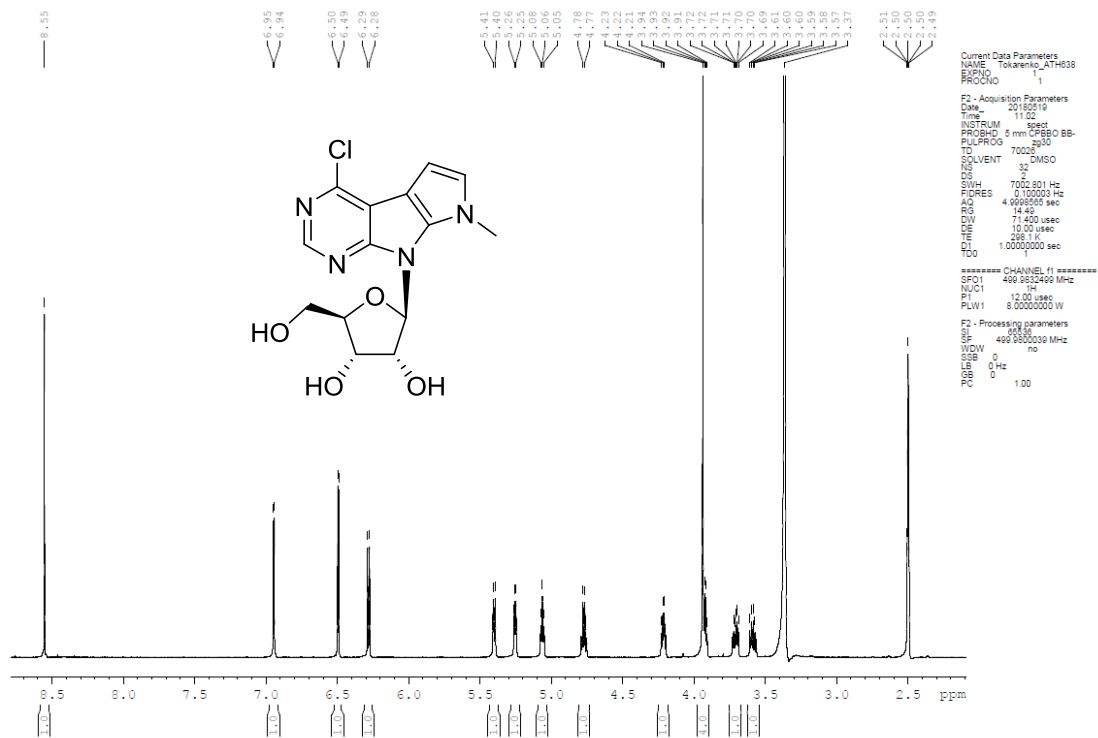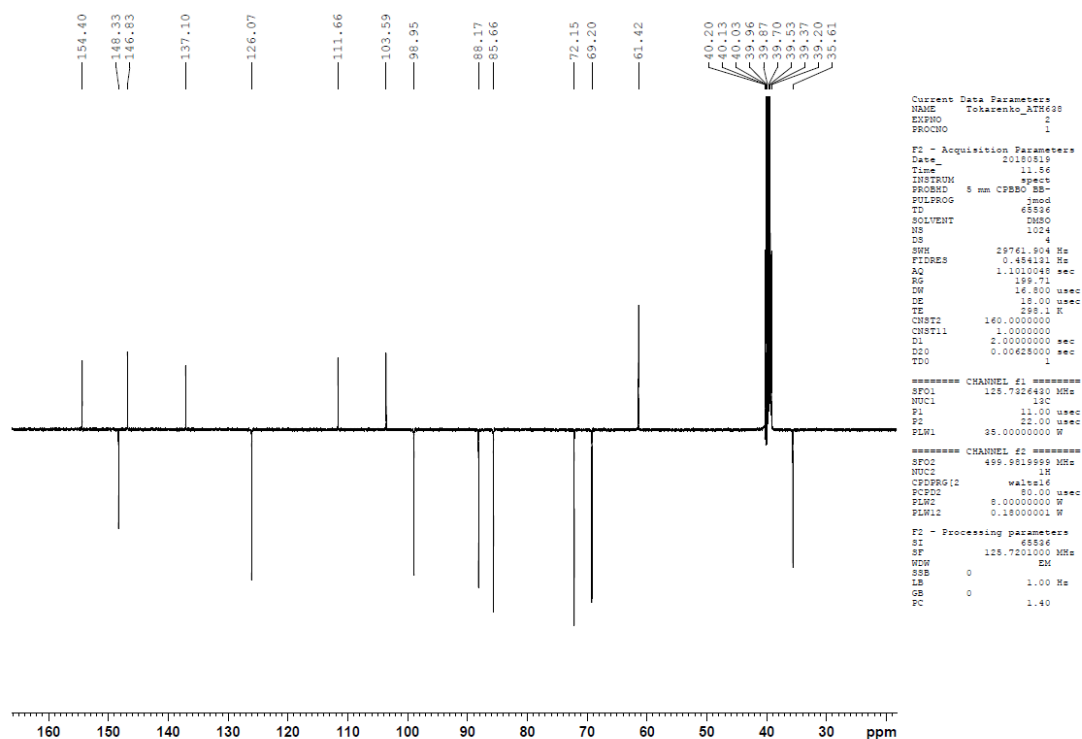

# NMR spectra of compound **25a**

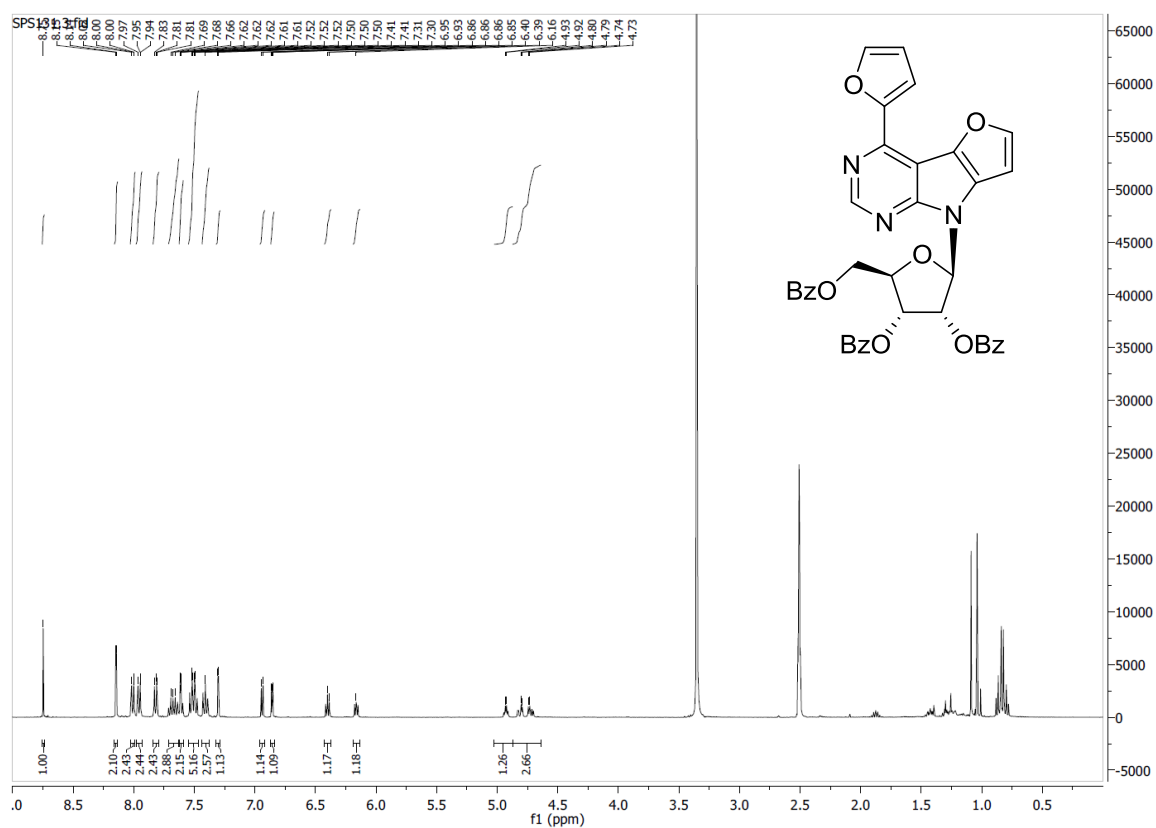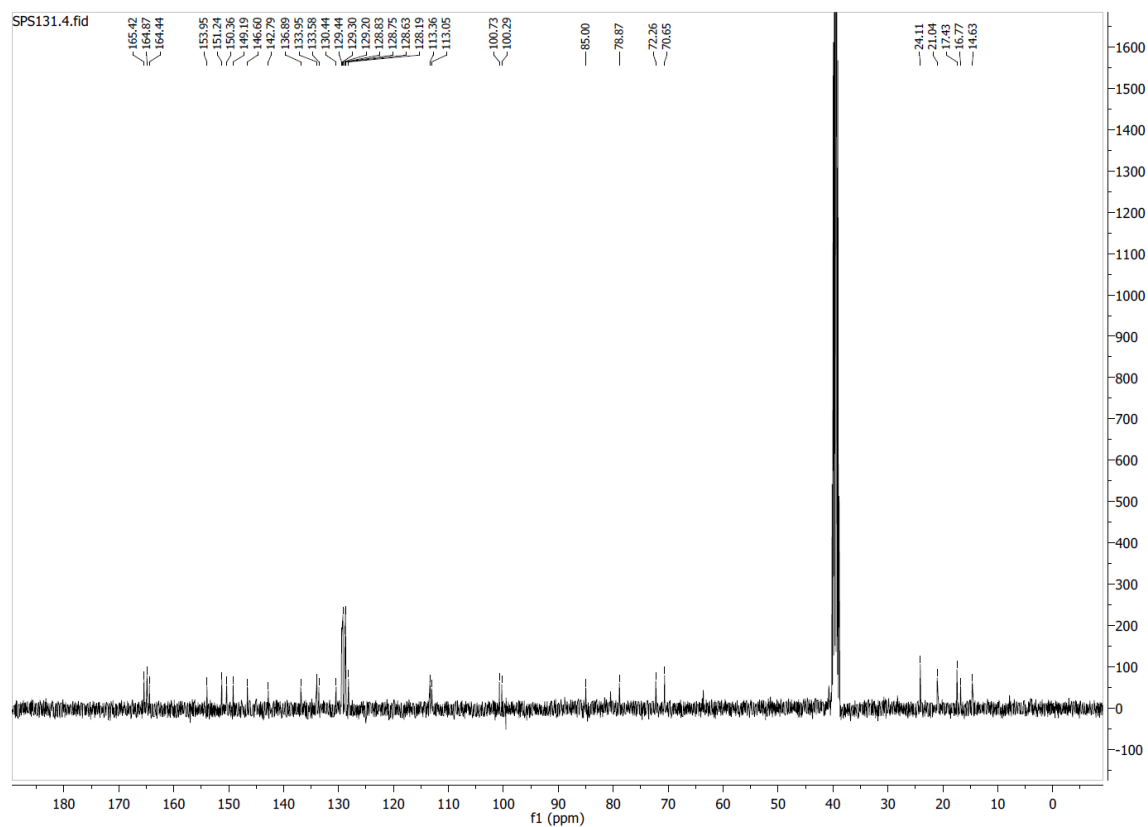

# NMR spectrum of compound **25b**

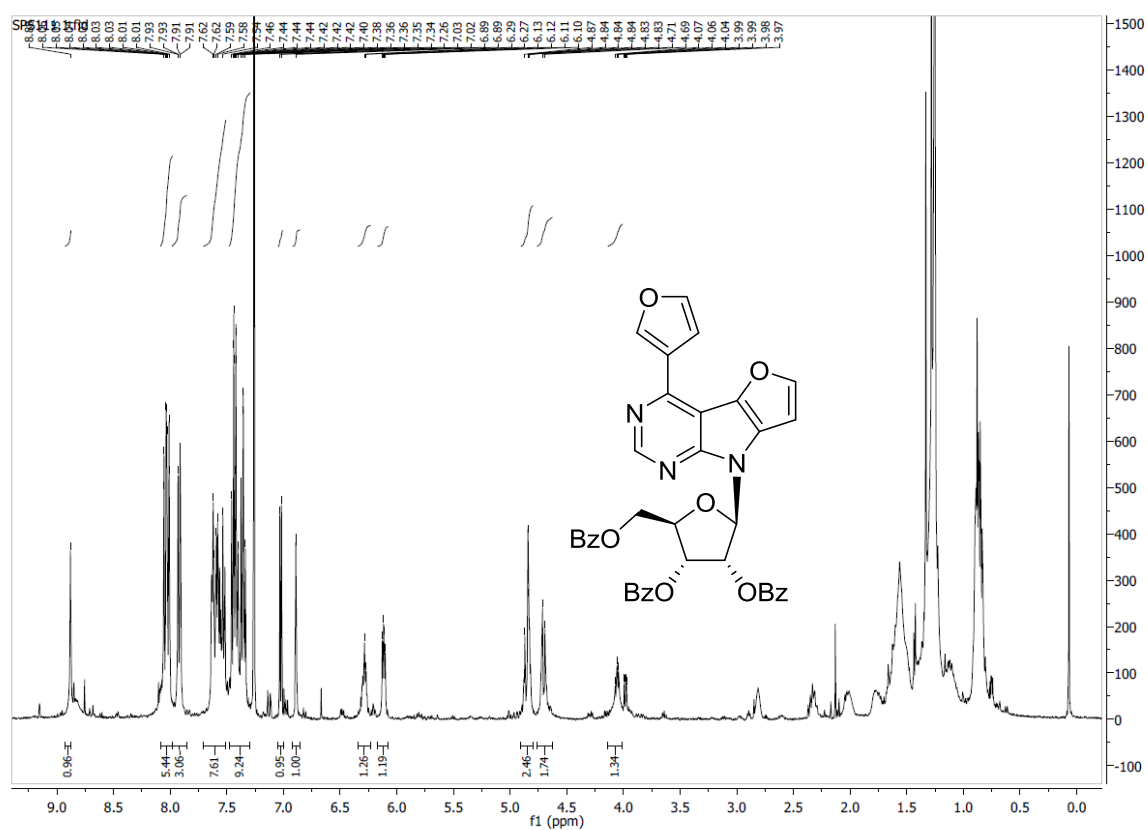

# NMR spectra of compound **25c**

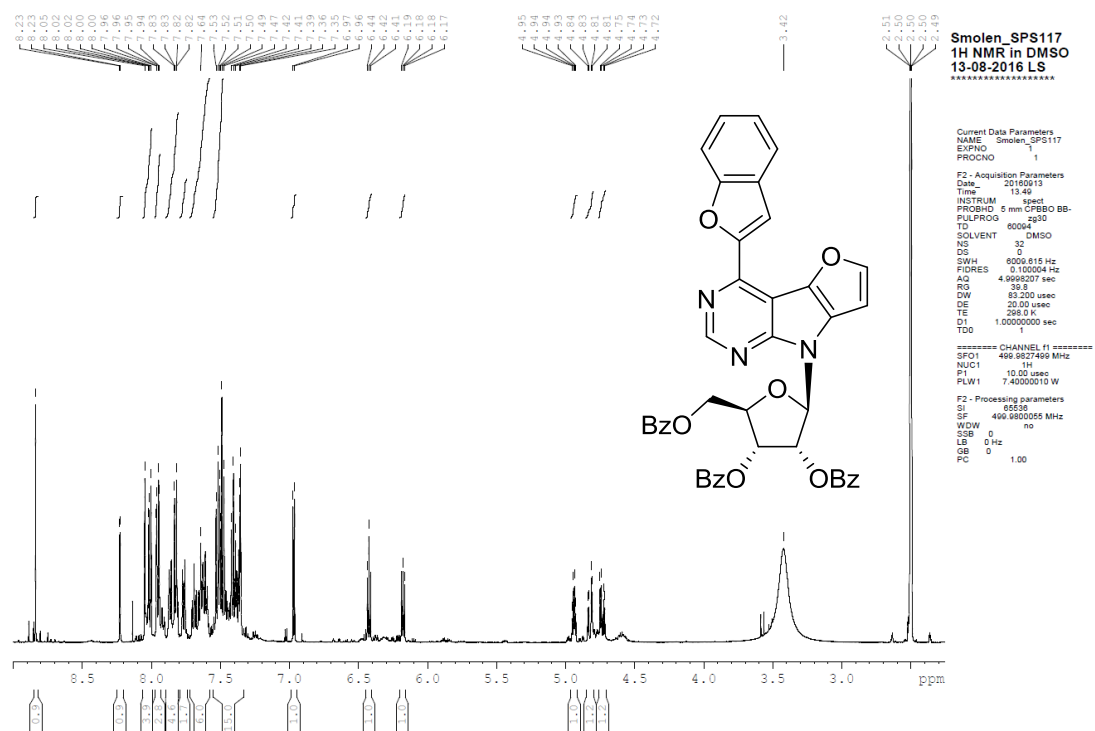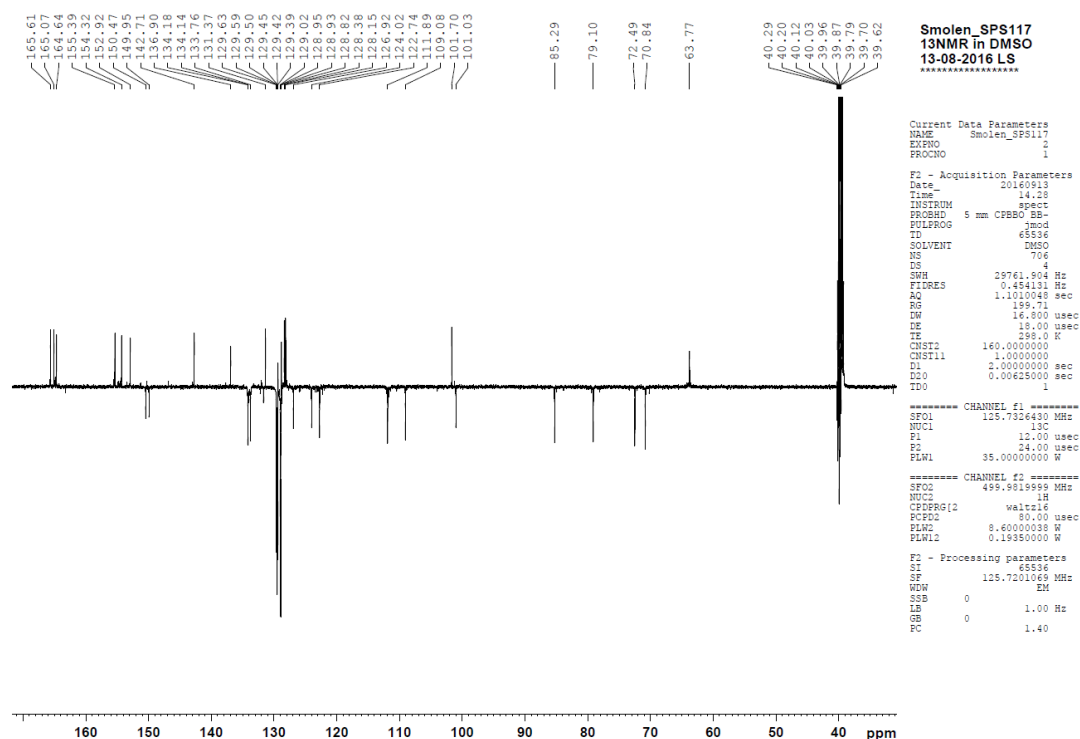

# NMR spectra of compound **25d**

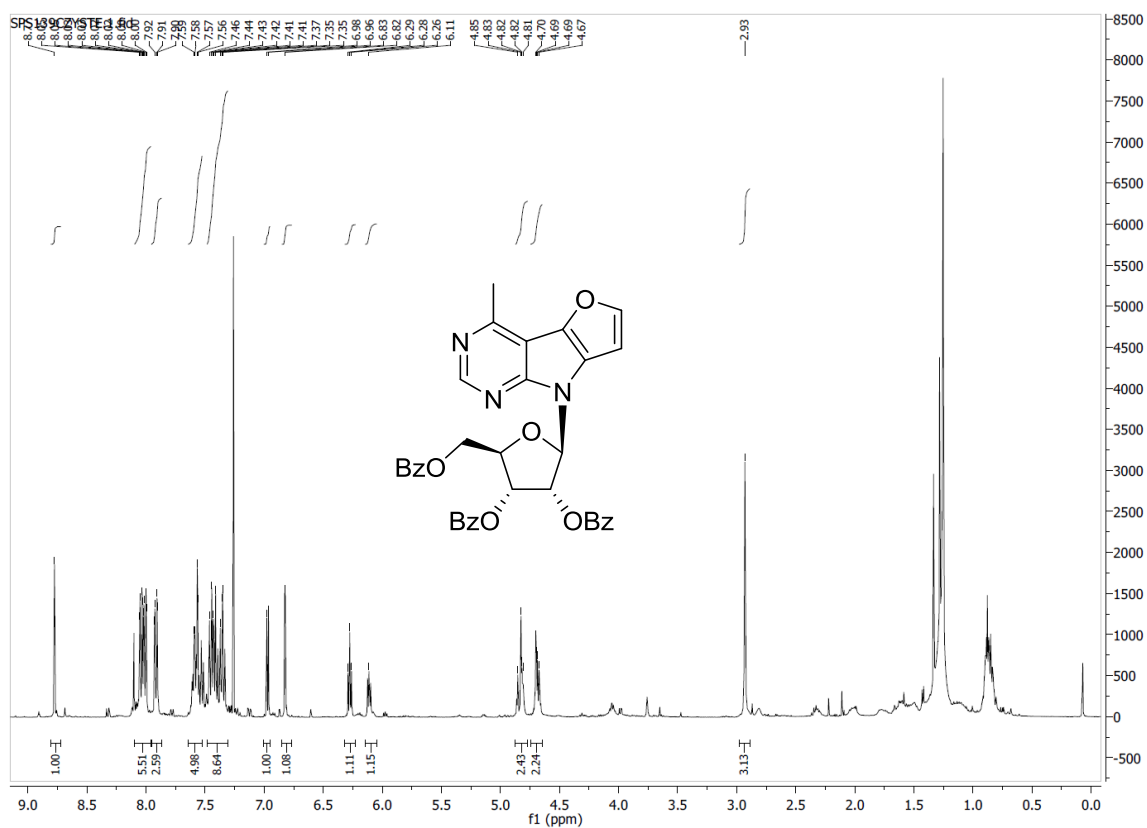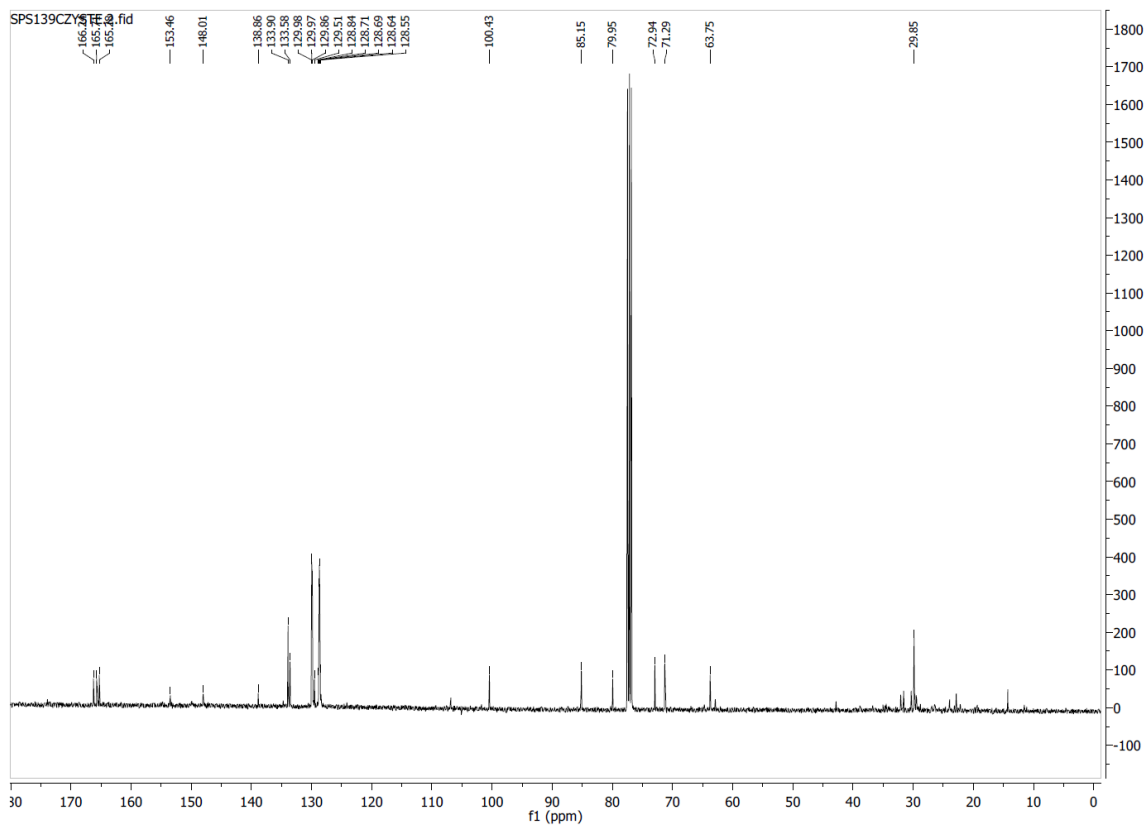

# NMR spectra of compound **25e**

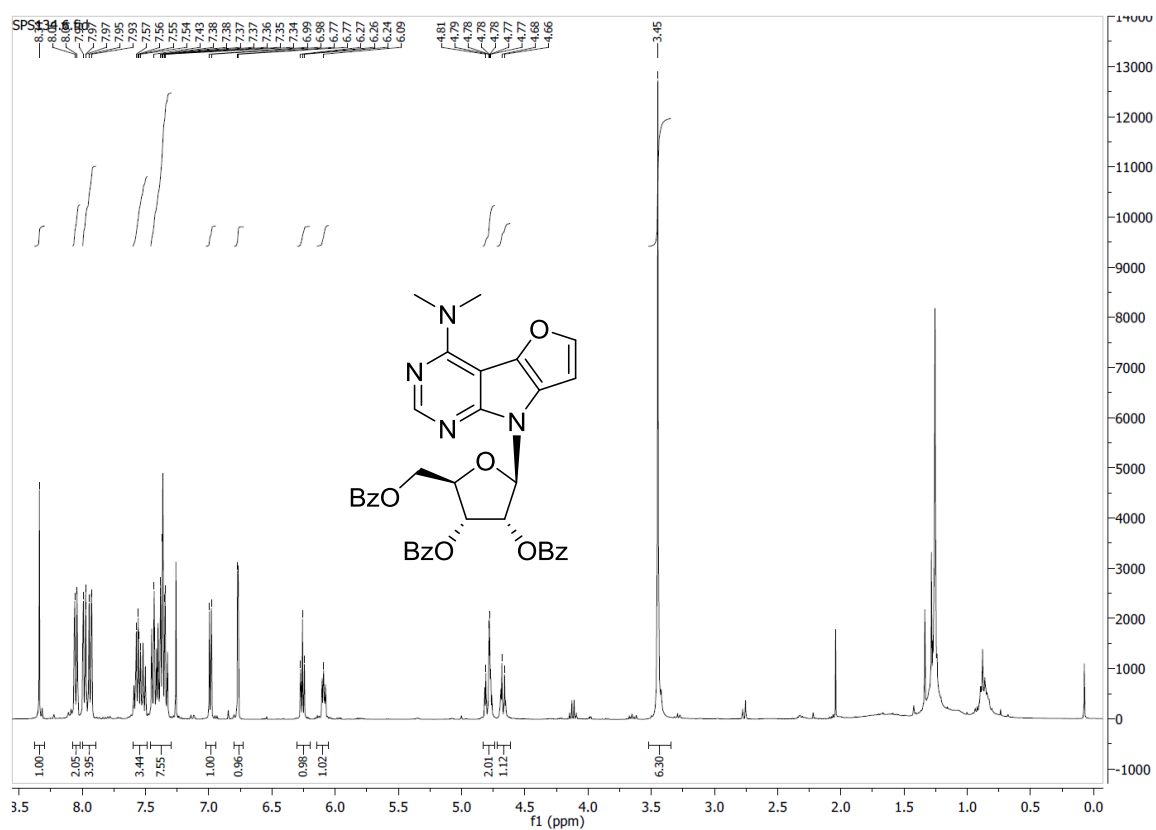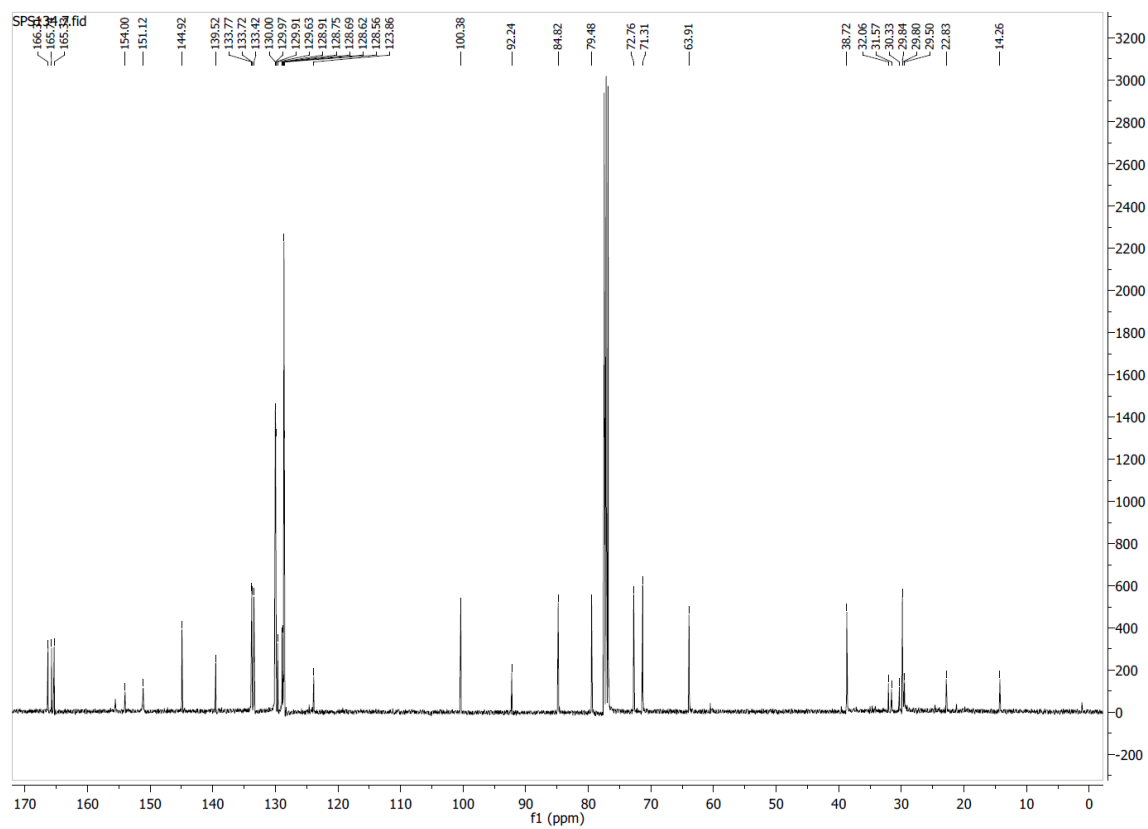

# NMR spectra of compound **26a**

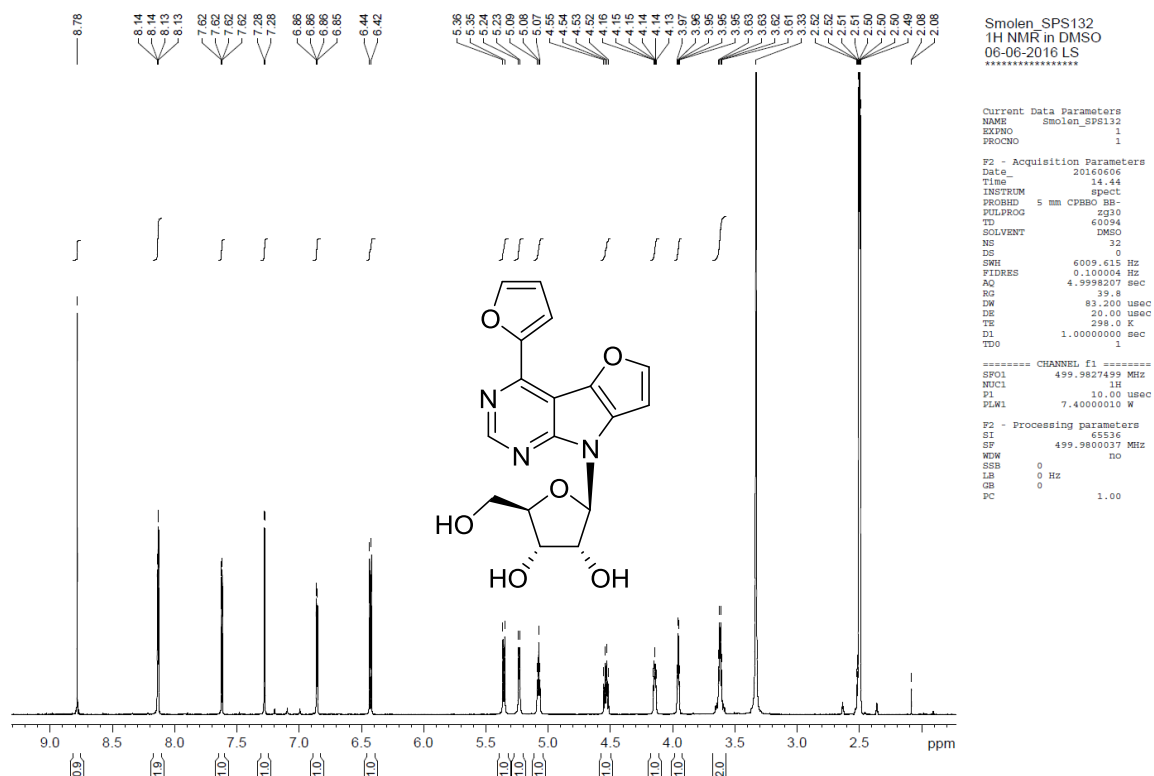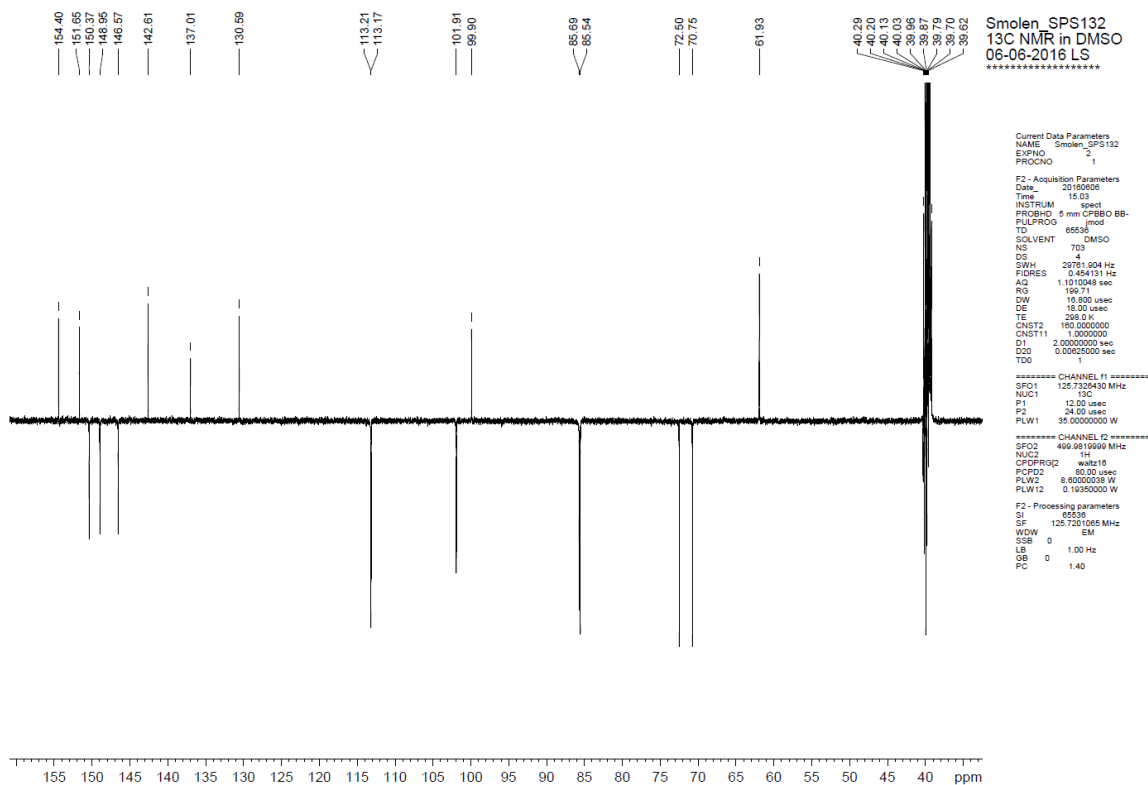



# NMR spectra of compound **26b**

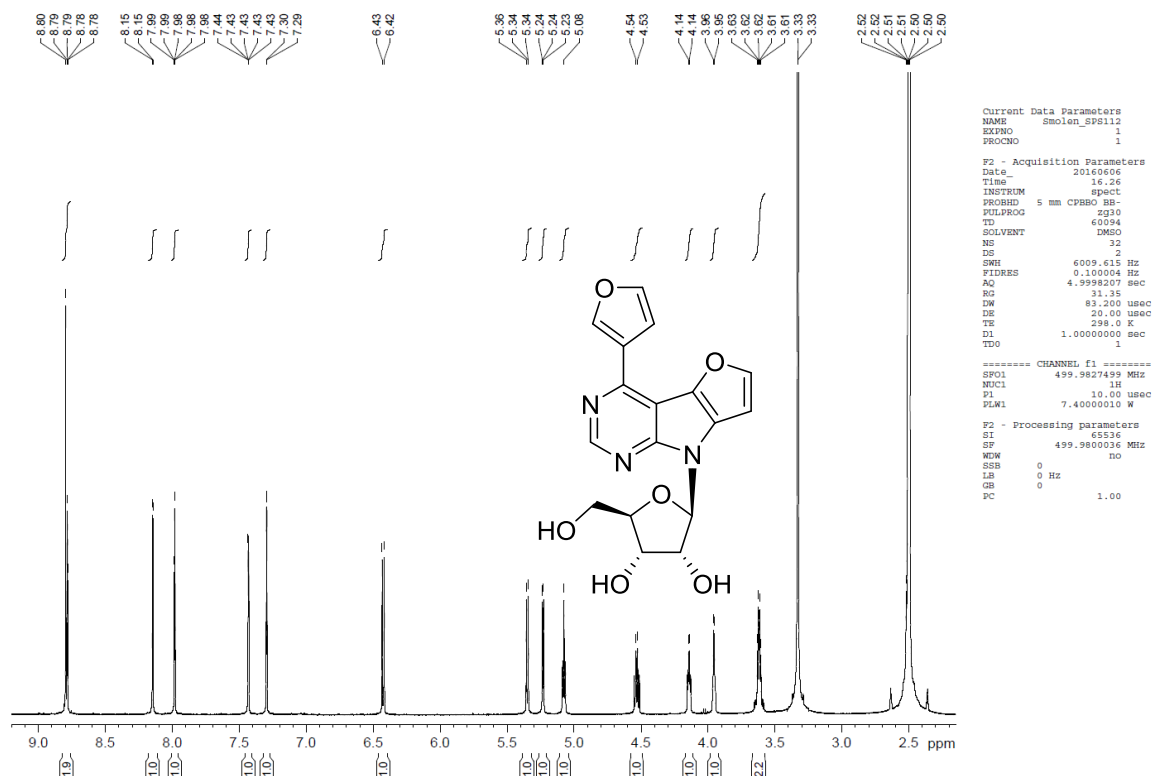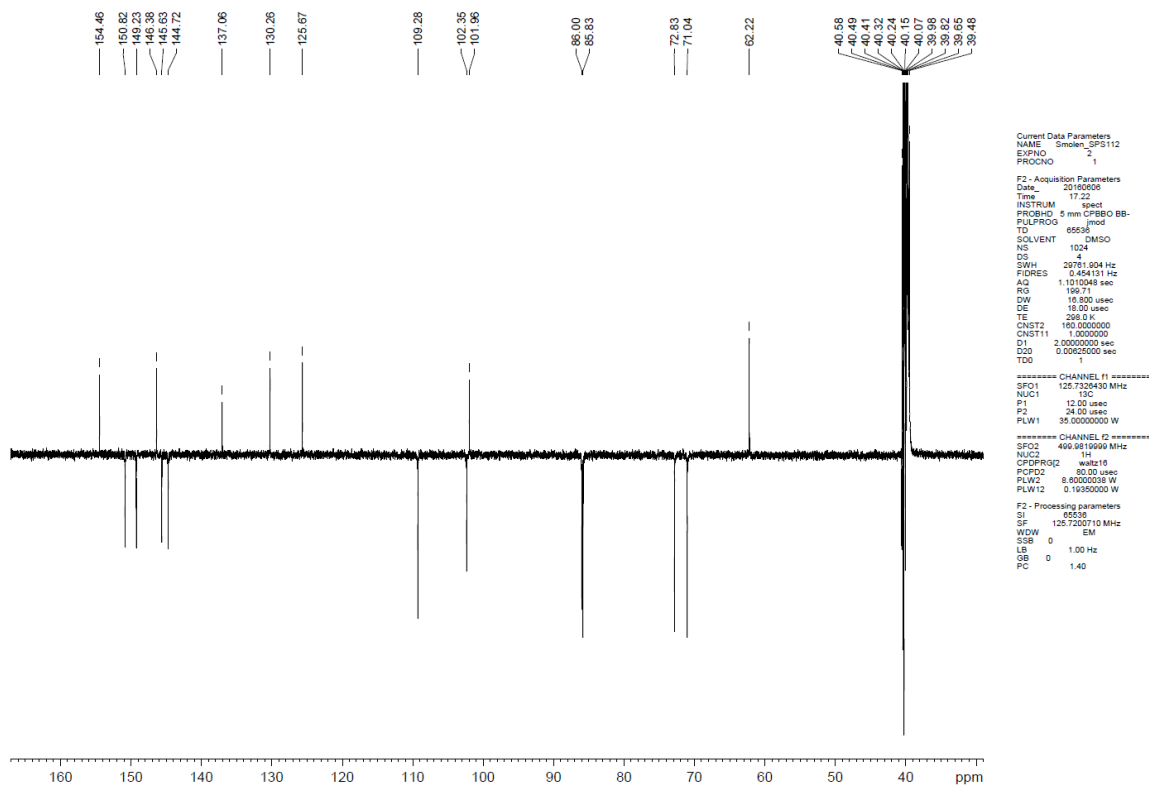

# NMR spectra of compound **26c**

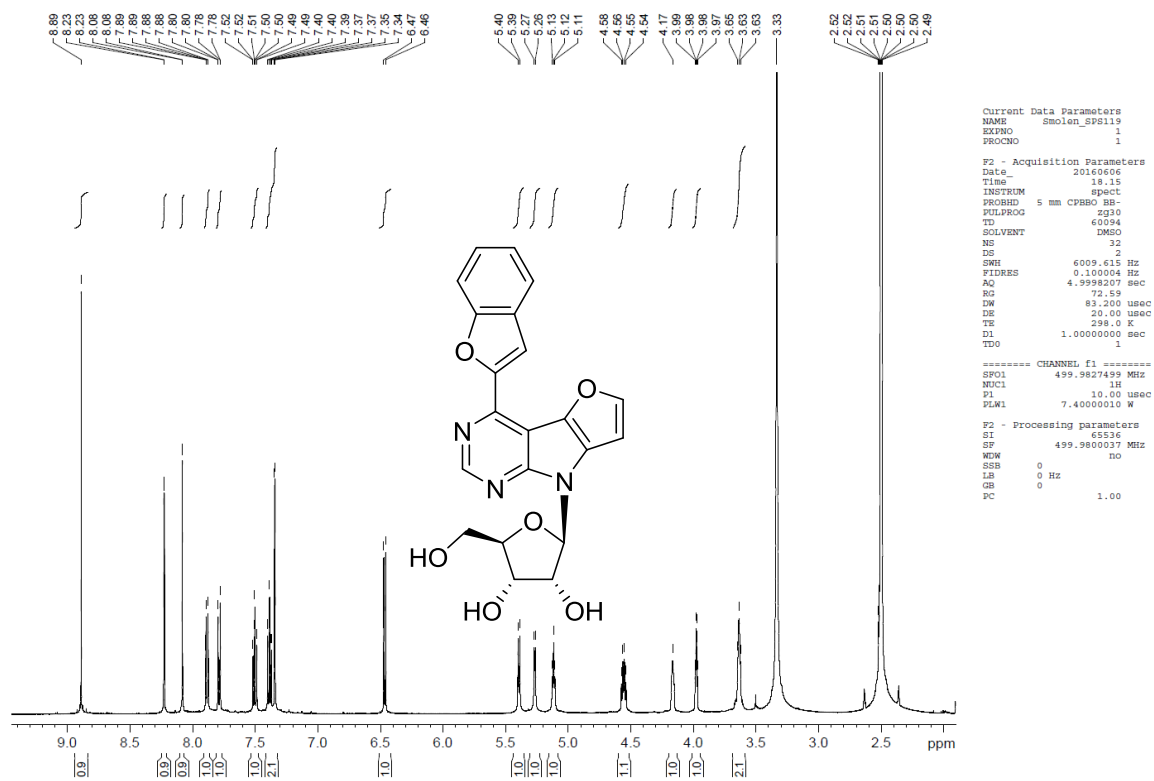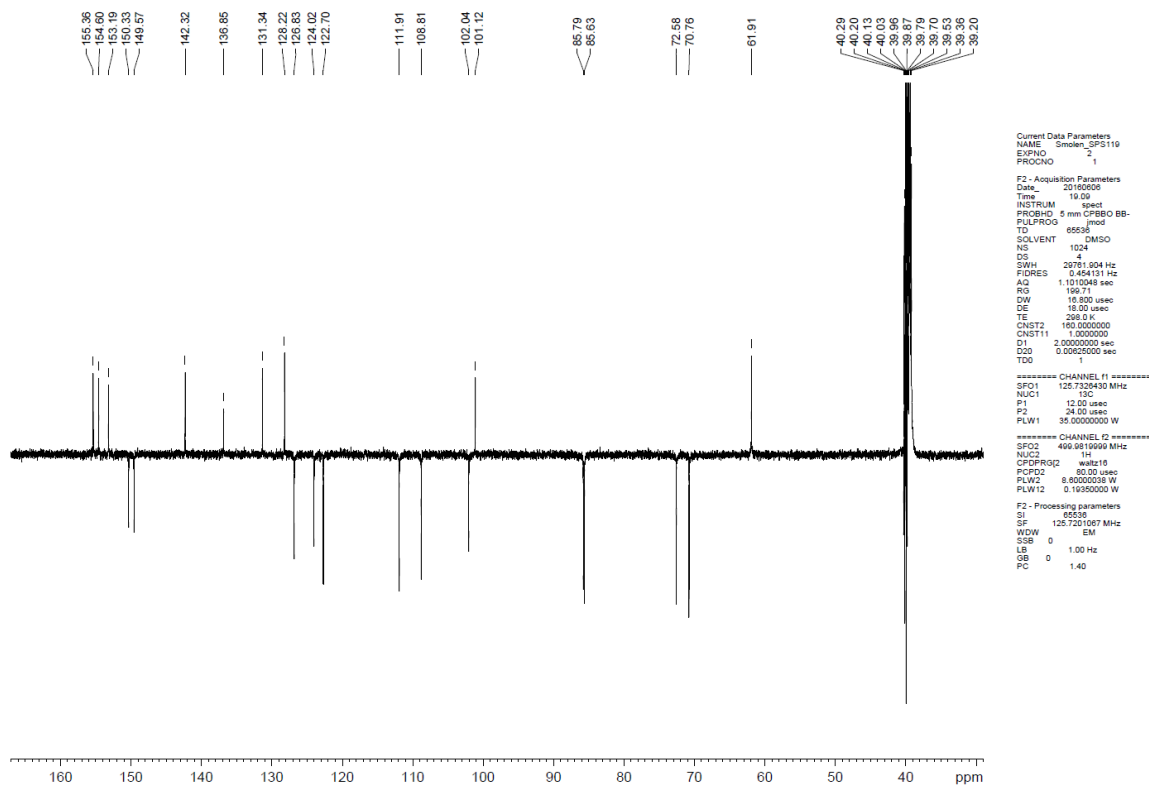

# NMR spectra of compound **26d**

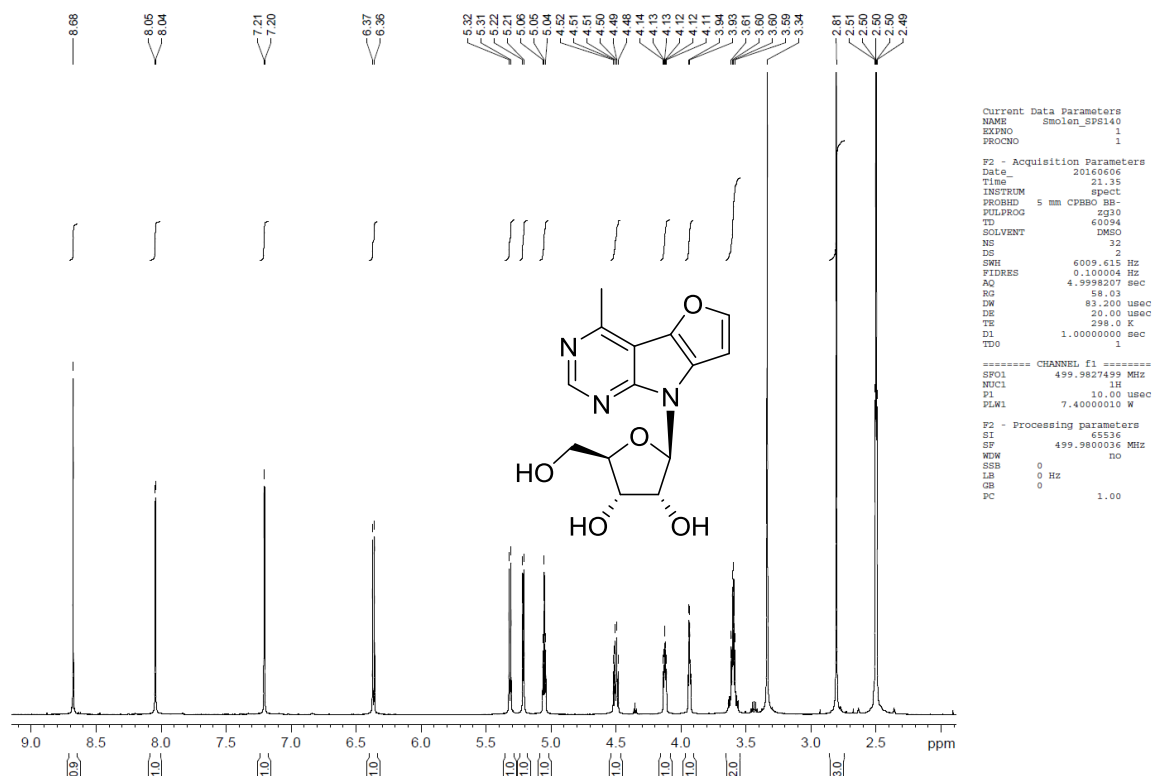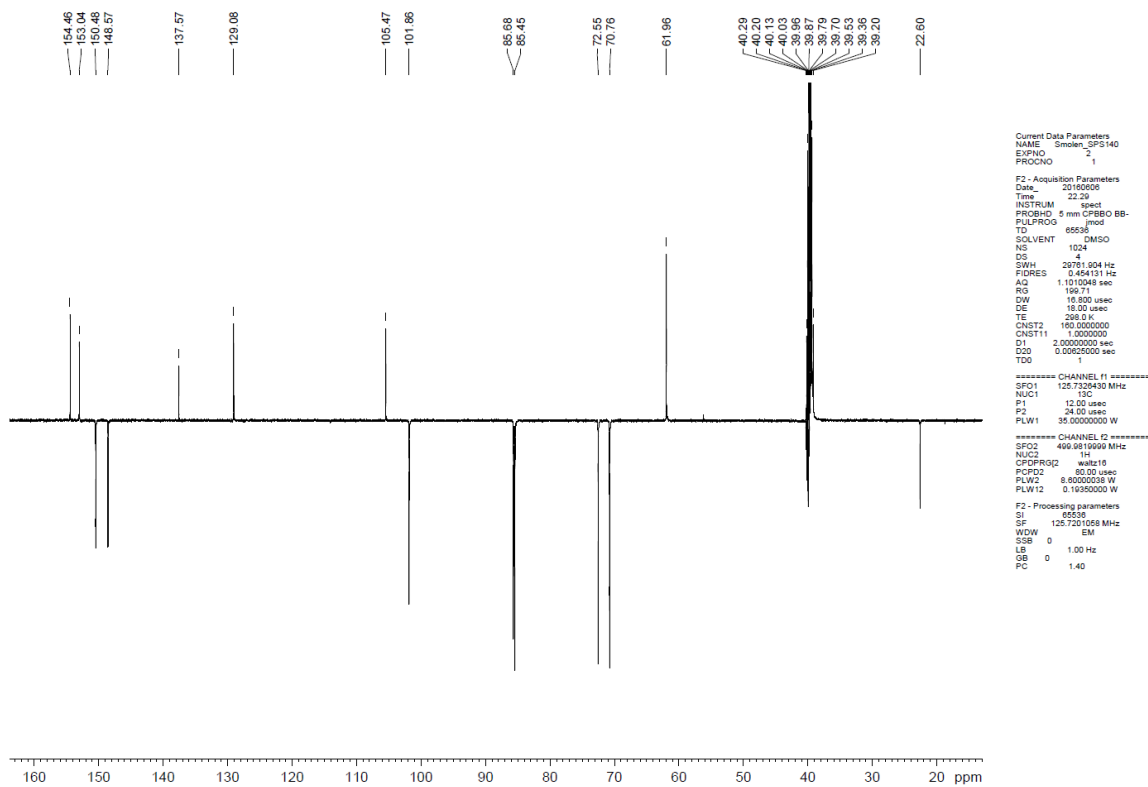

# NMR spectra of compound **26d-MP**

PERLIKOVA PAS798  
1H NMR in D2O  
16-08-17 RA  
\*\*\*\*\*

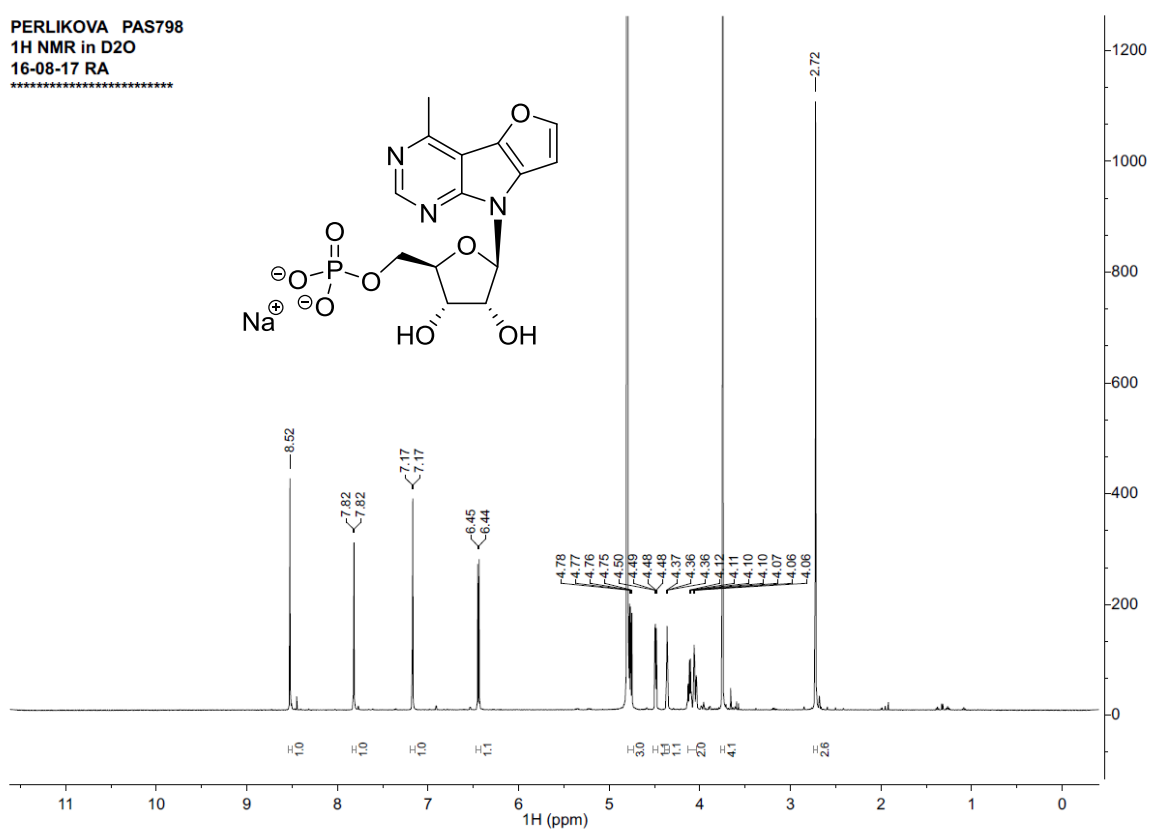

PERLIKOVA PAS798  
APT in D2O  
16-08-17 RA  
\*\*\*\*\*

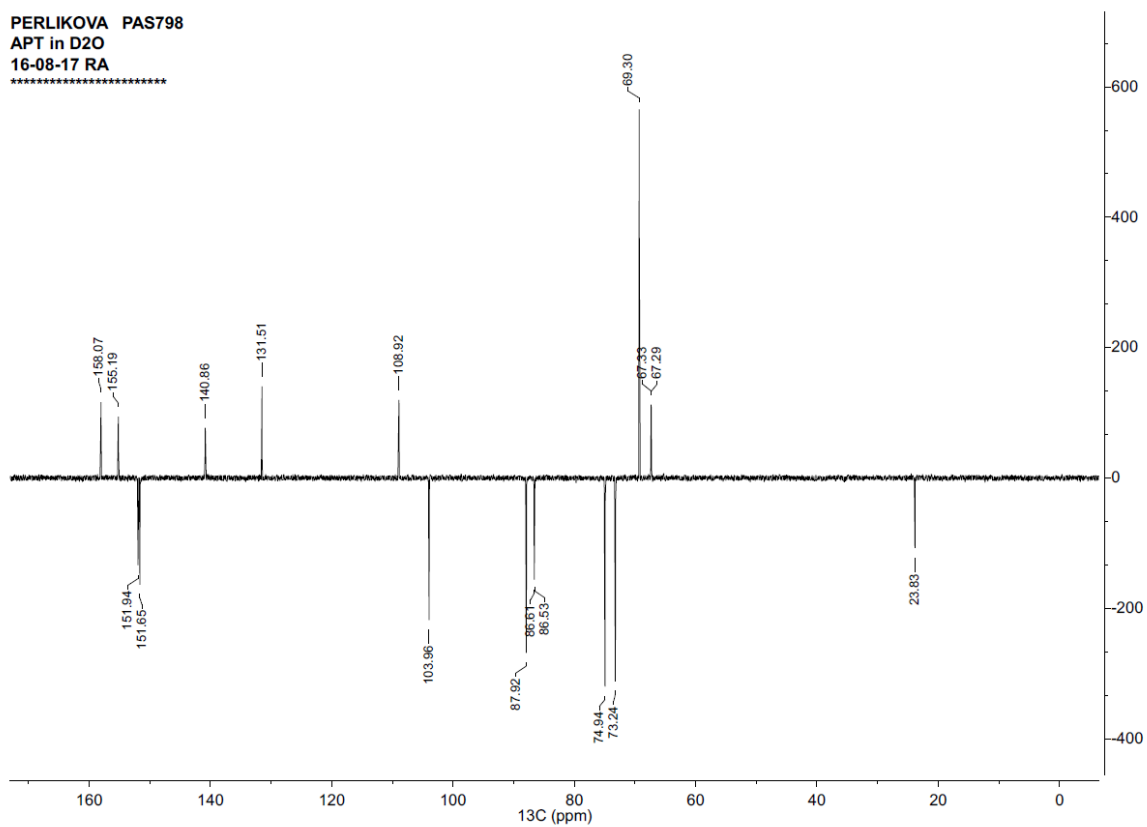

PERLIKOVA PAS798  
31P{1H} in D2O  
16-08-17 RA  
\*\*\*\*\*

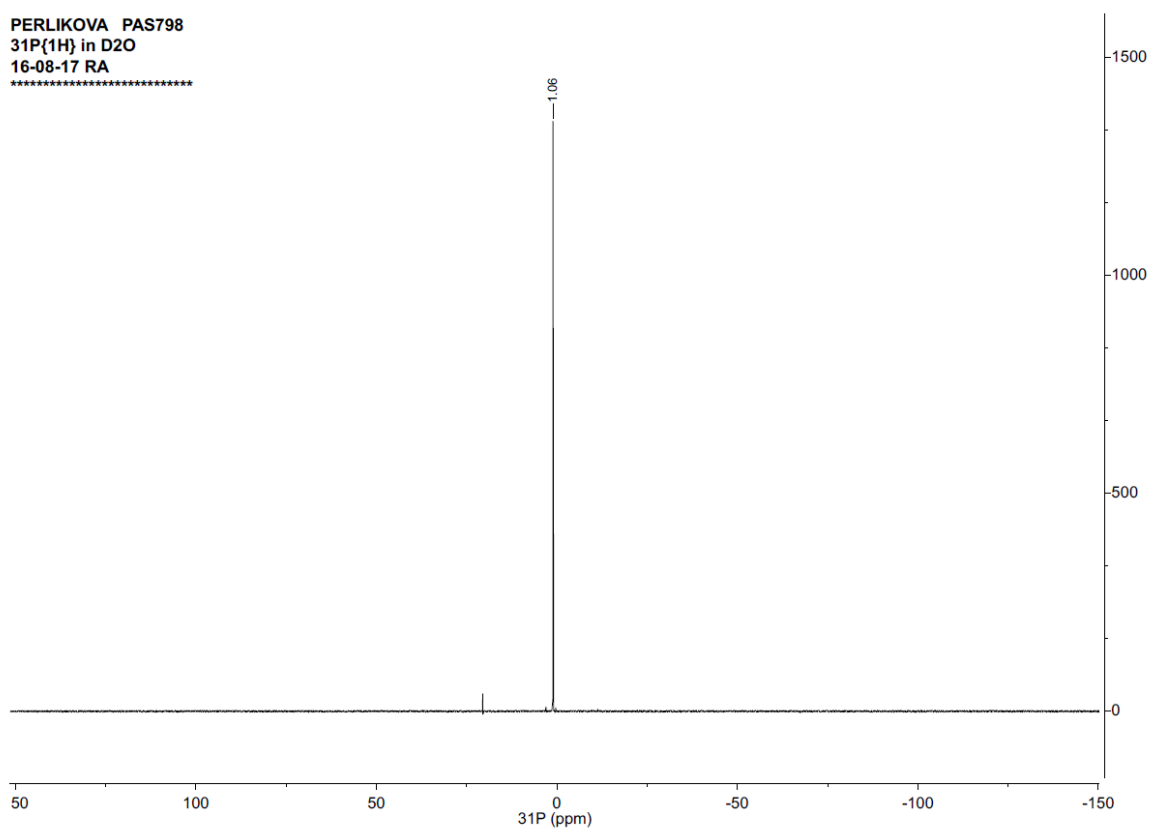

# NMR spectra of compound **26e**

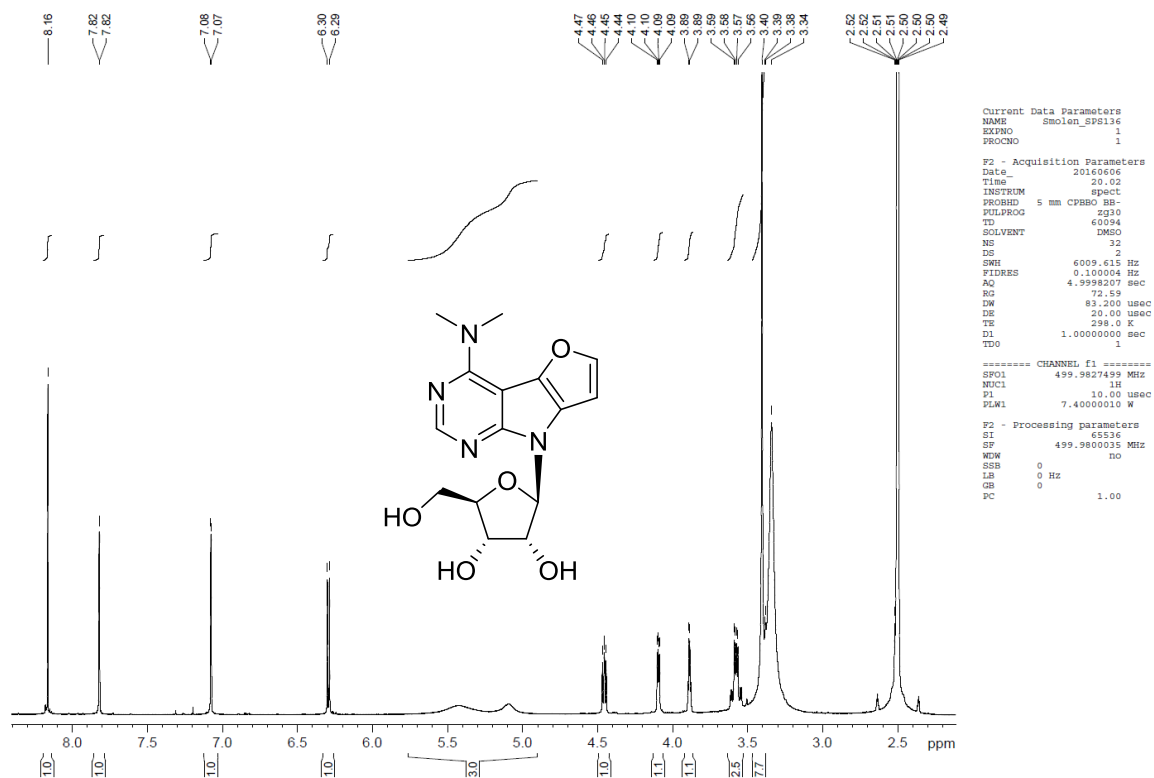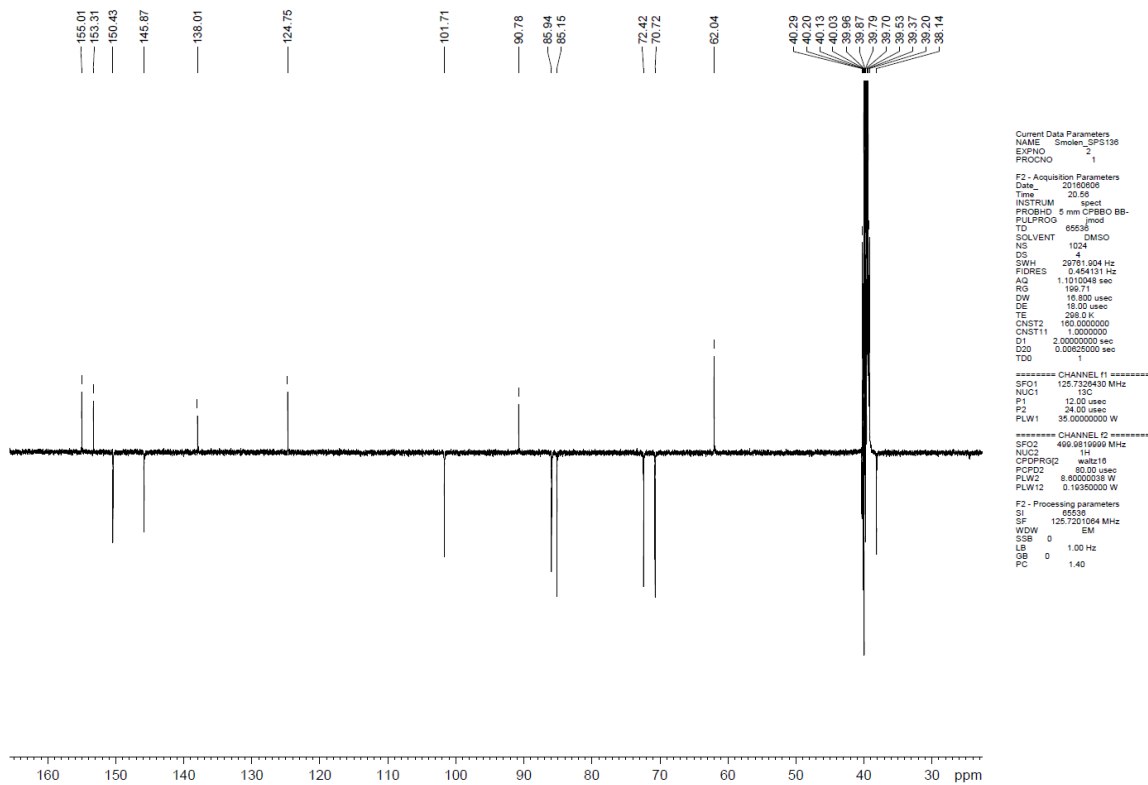

## S63

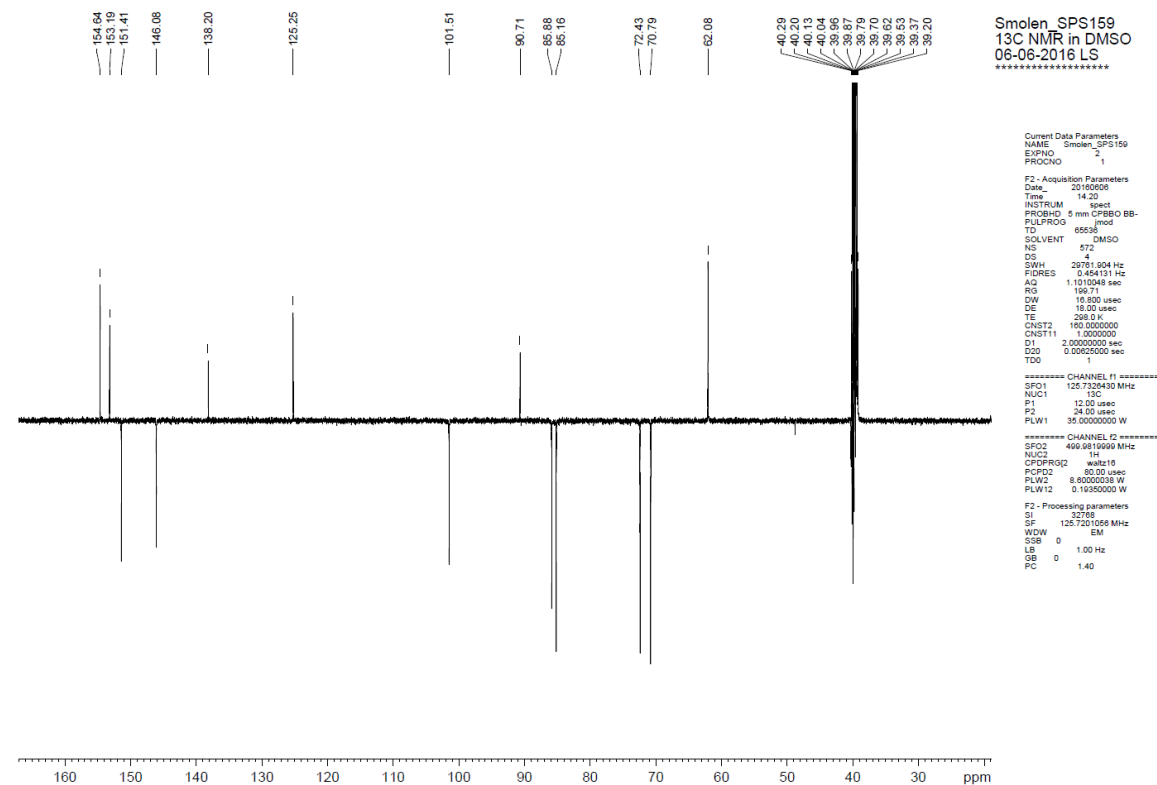

## S64

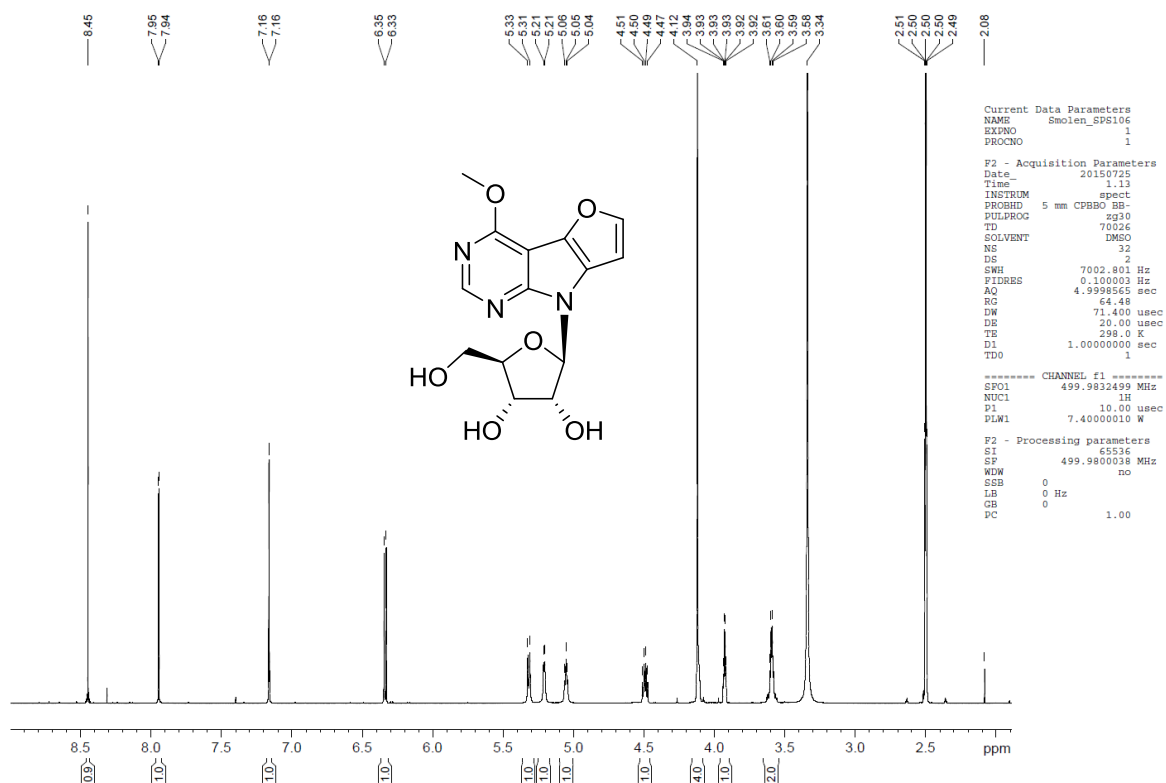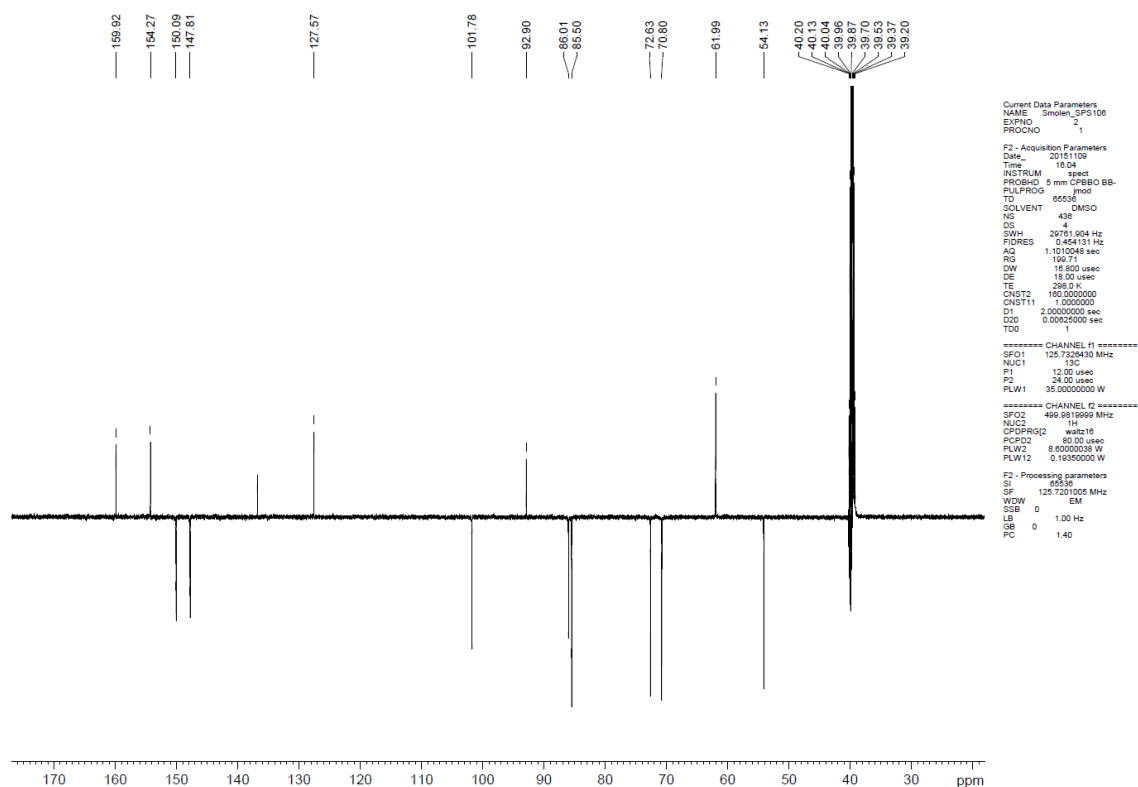



# NMR spectra of compound **26h**

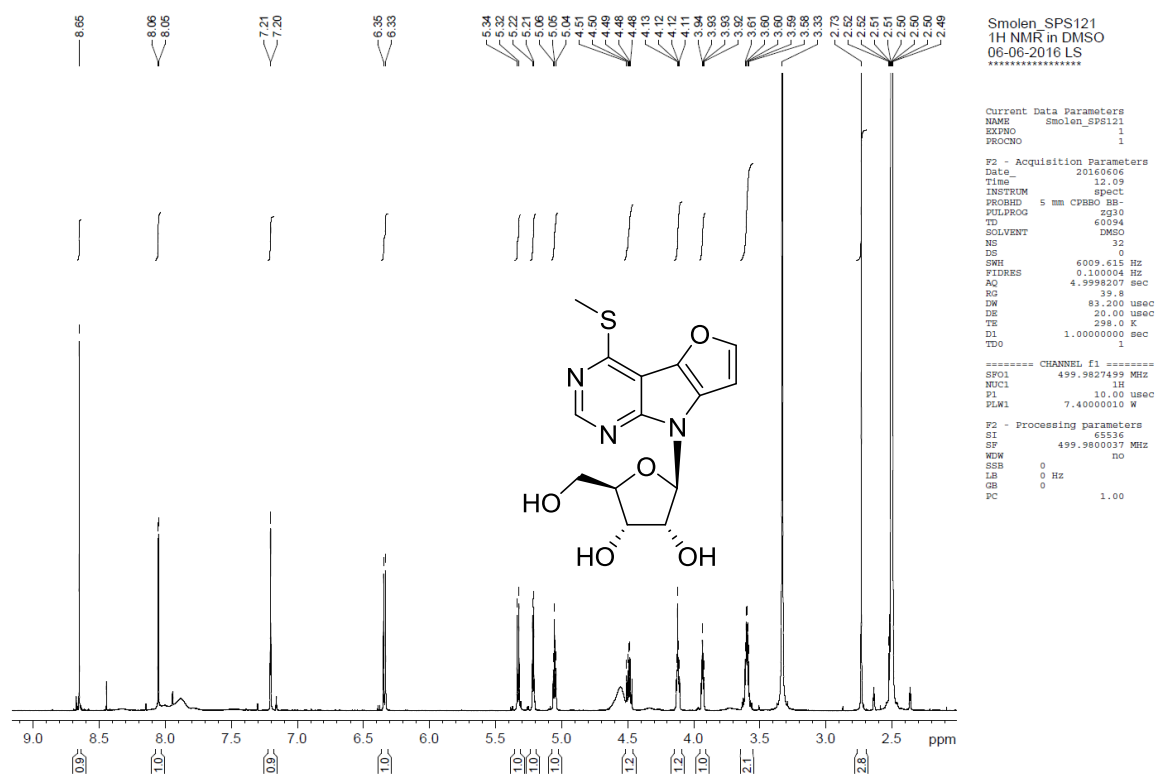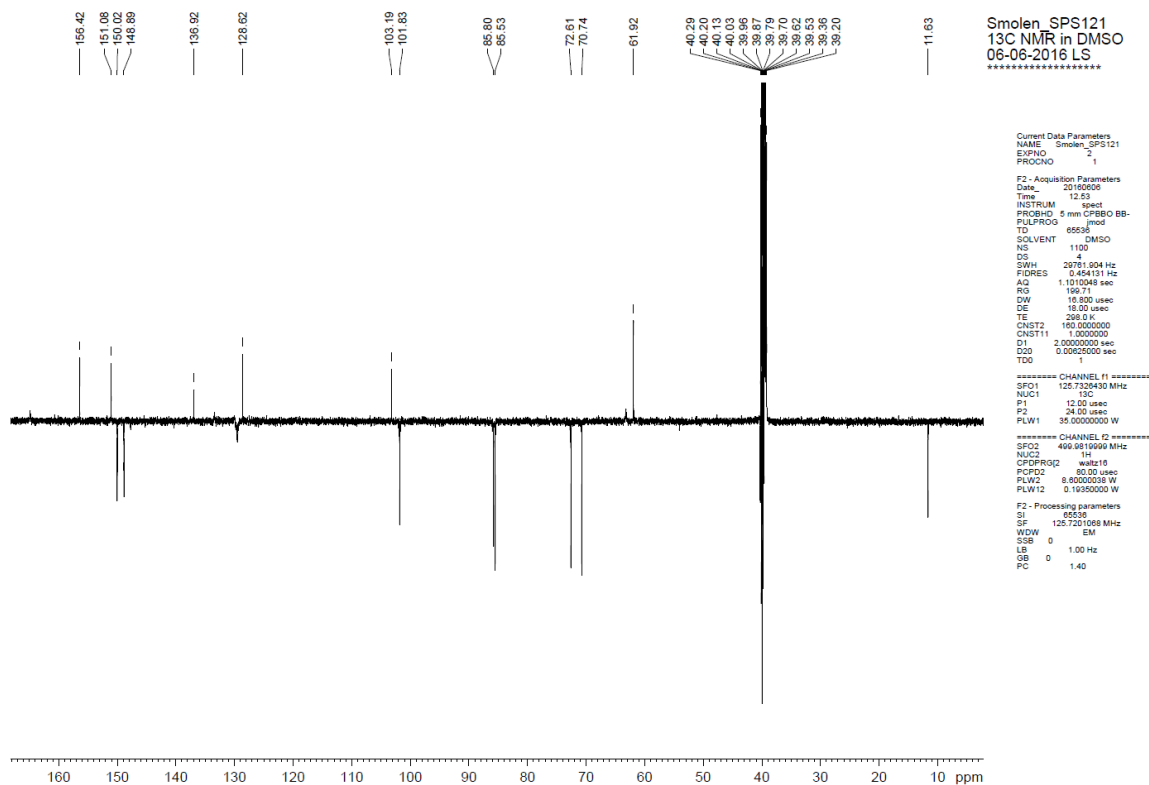

TOKARENKO ATH-621  
1H NMR in CDCl3  
05-12-17 RA  
\*\*\*\*\*

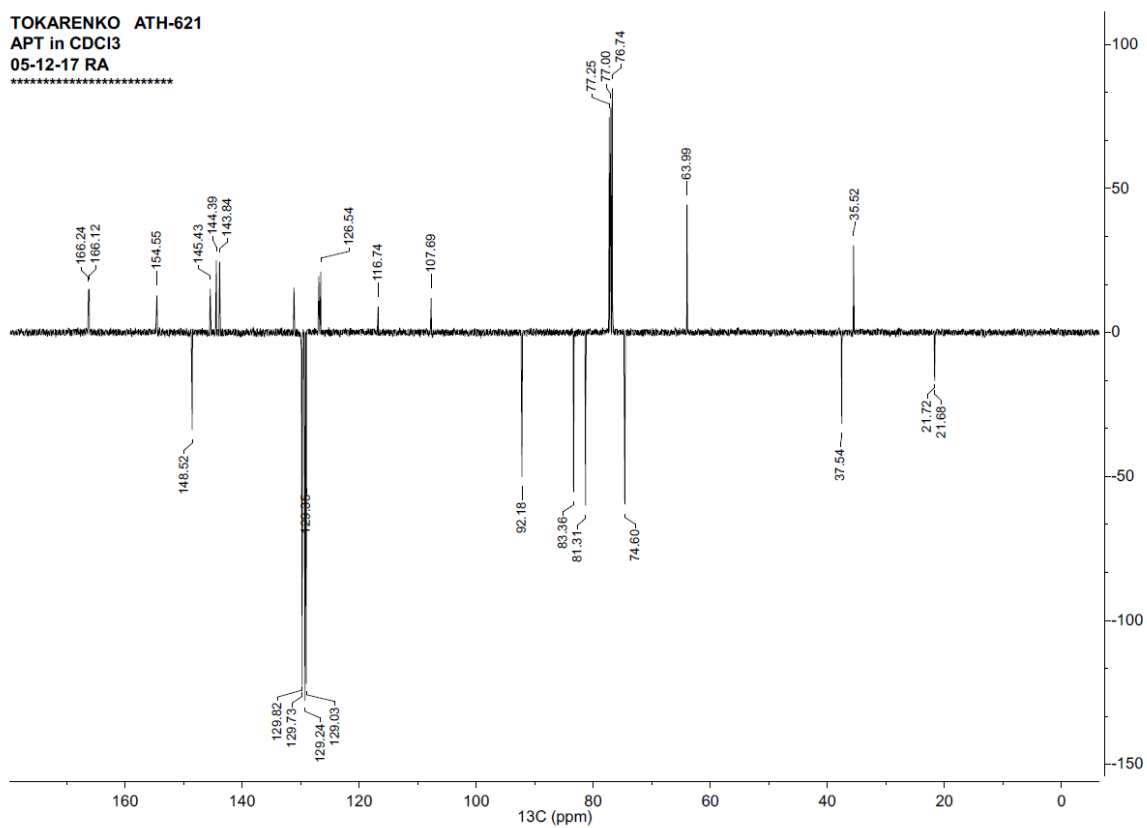

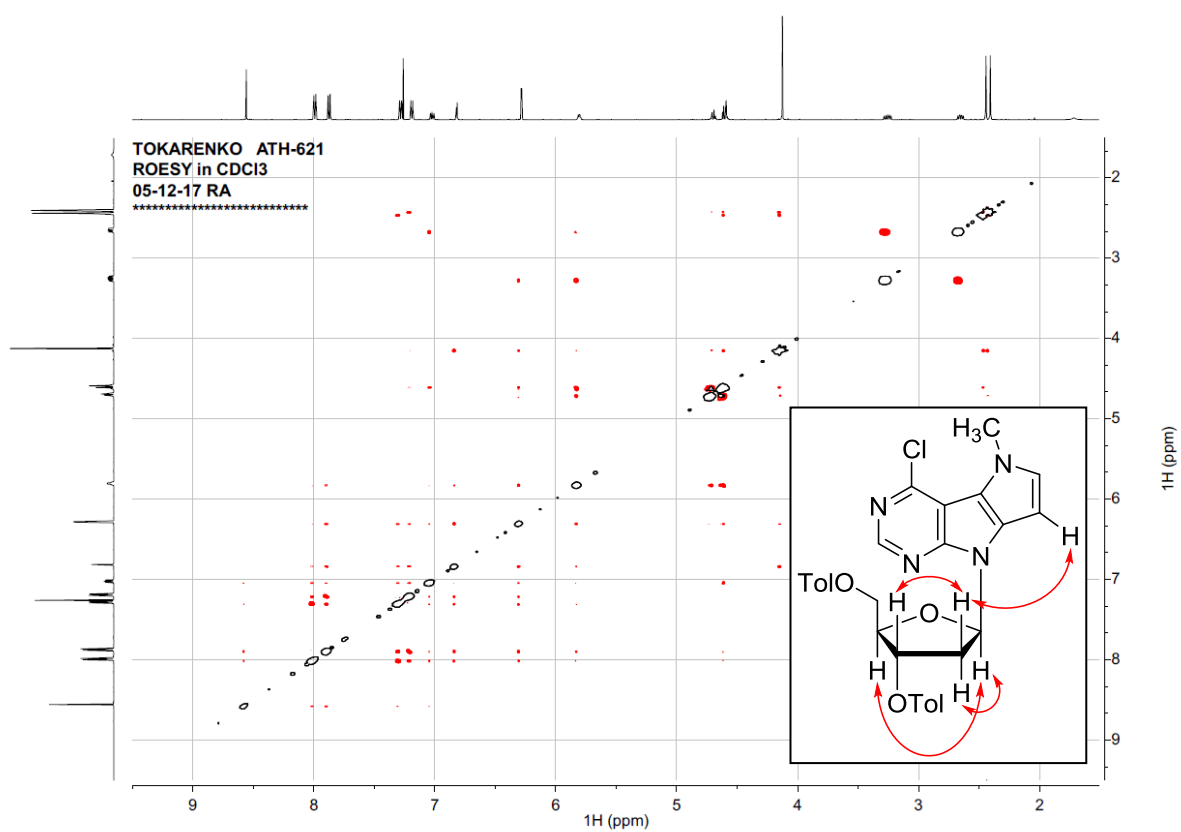

# NMR spectra of compound **28**

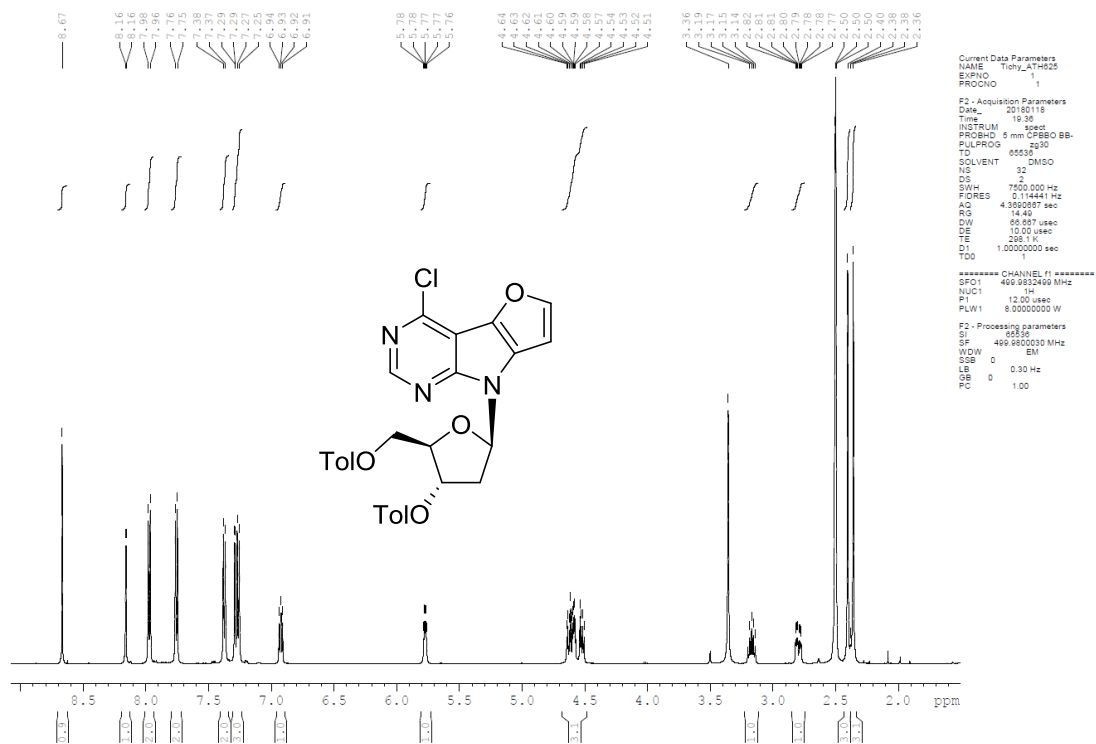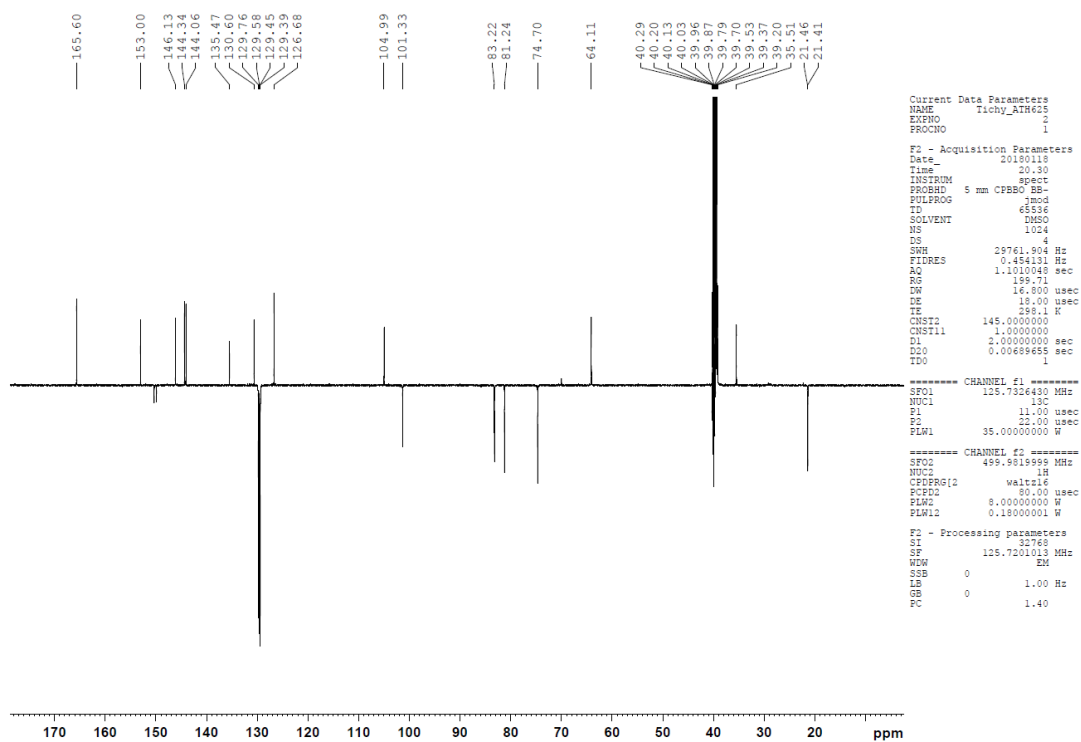

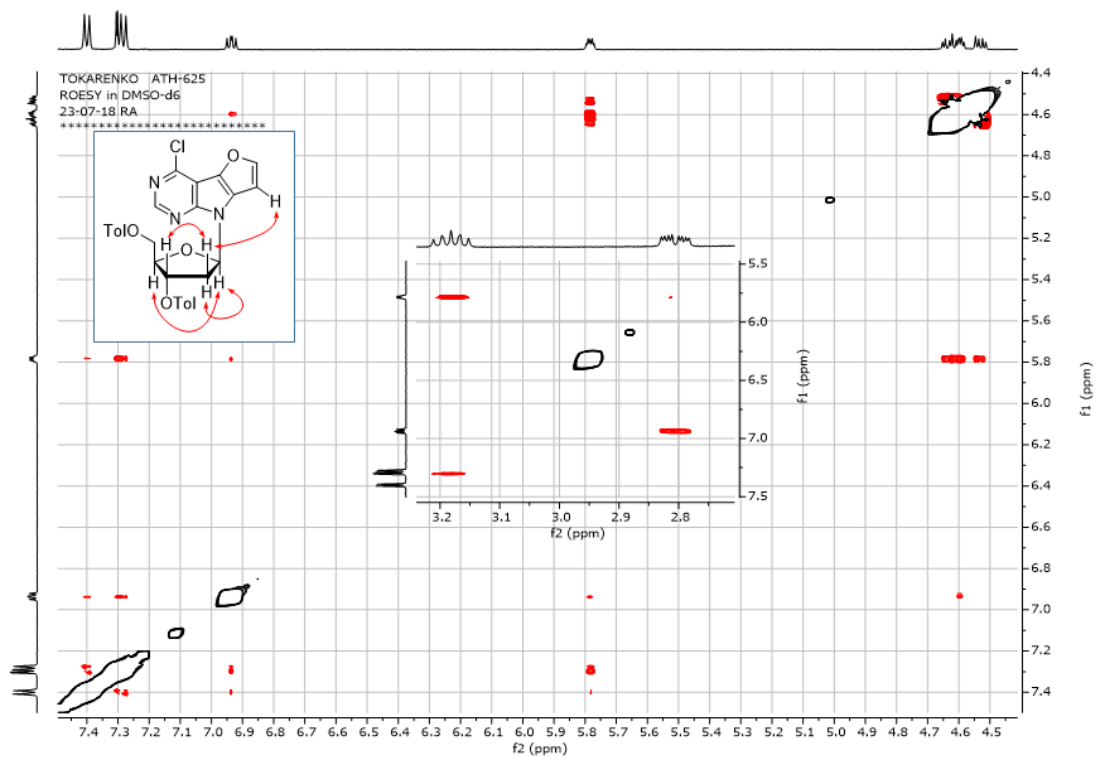

# NMR spectra of compound **29**

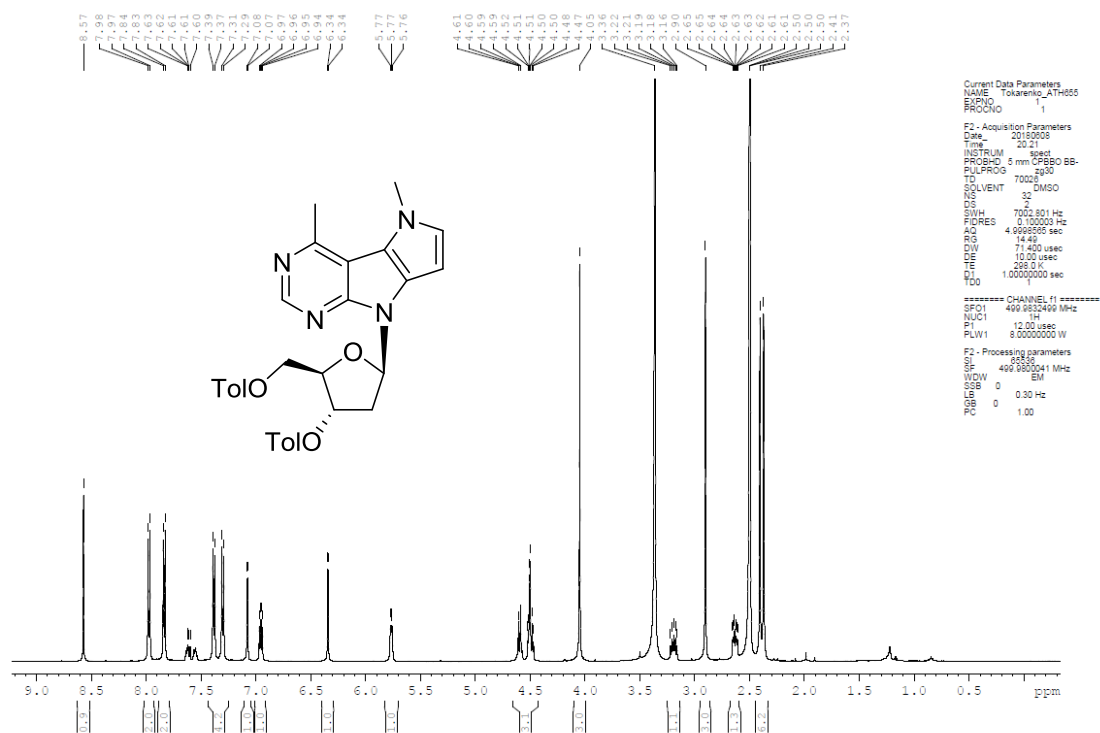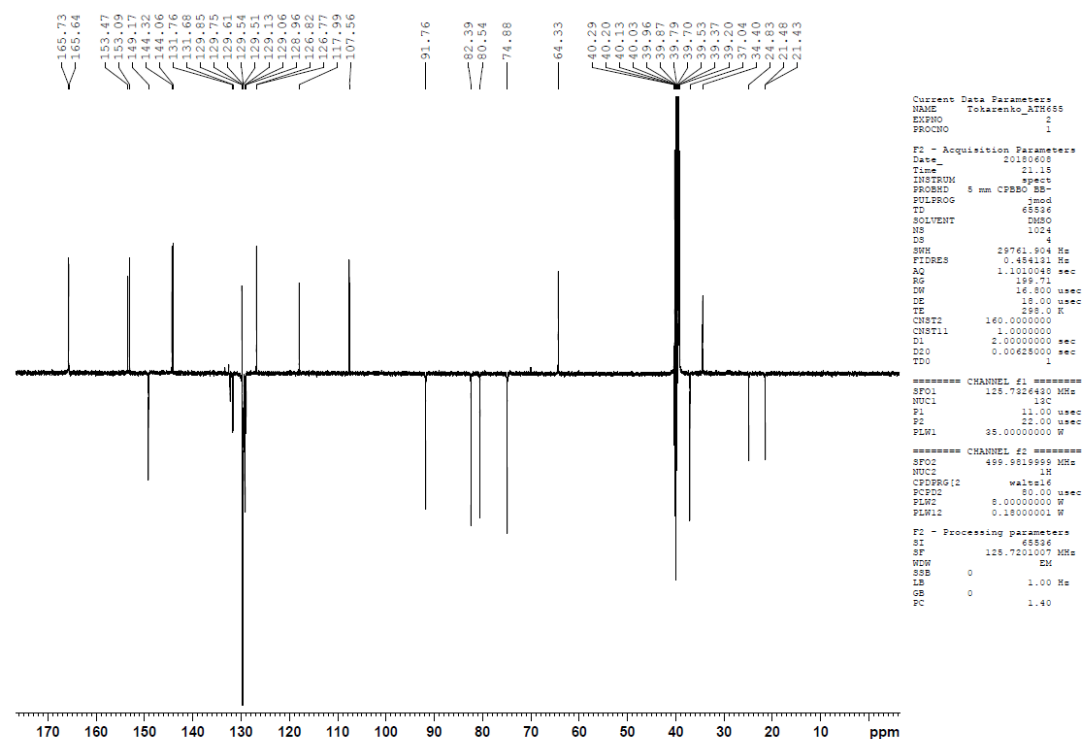

# NMR spectra of compound **30**

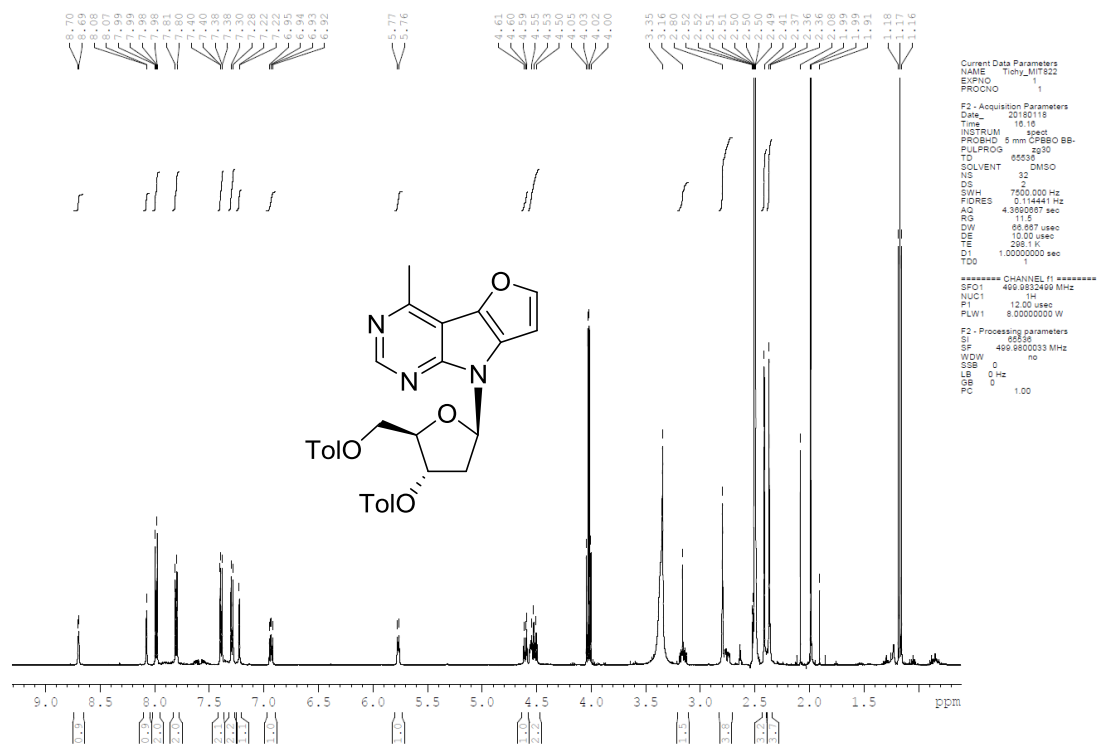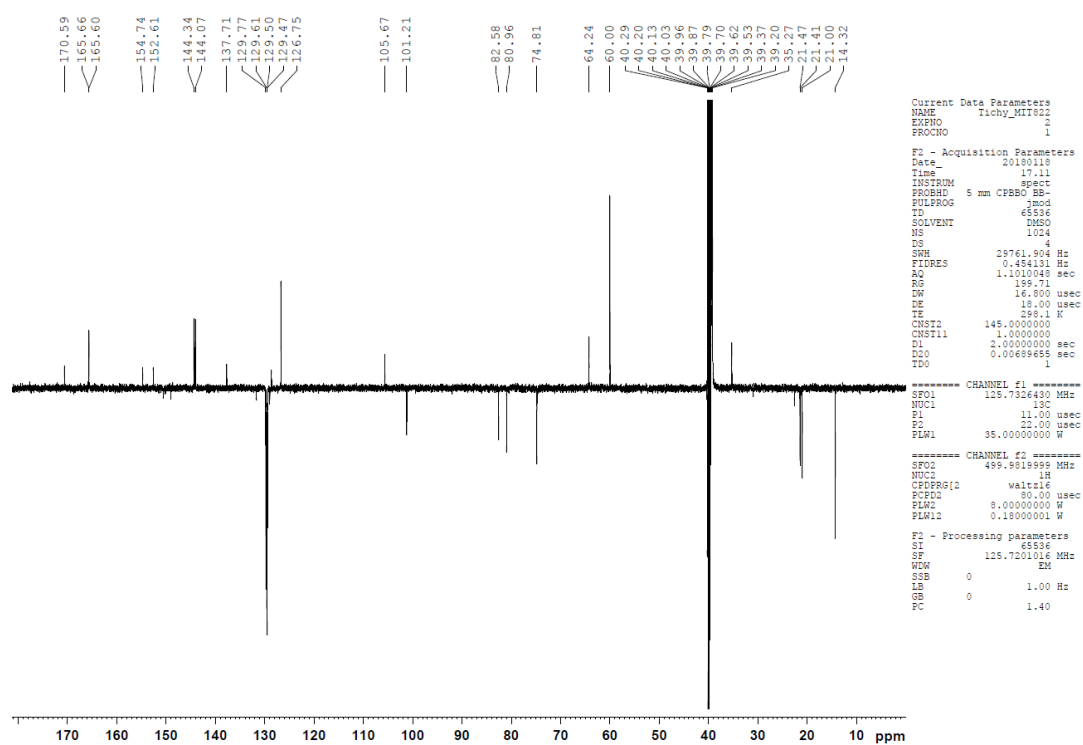

## S72

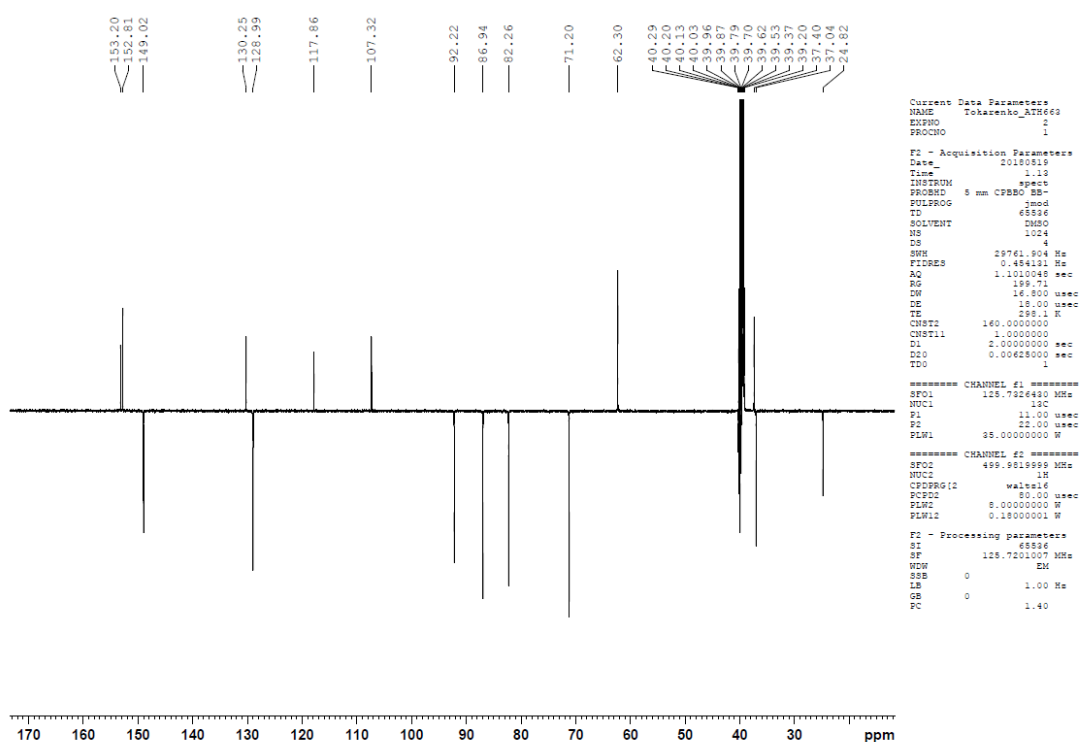



# NMR spectra of compound **31-MP**

TOKARENKO ATH-624

<sup>1</sup>H NMR in D<sub>2</sub>O

15-01-18 RA

\*\*\*\*\*

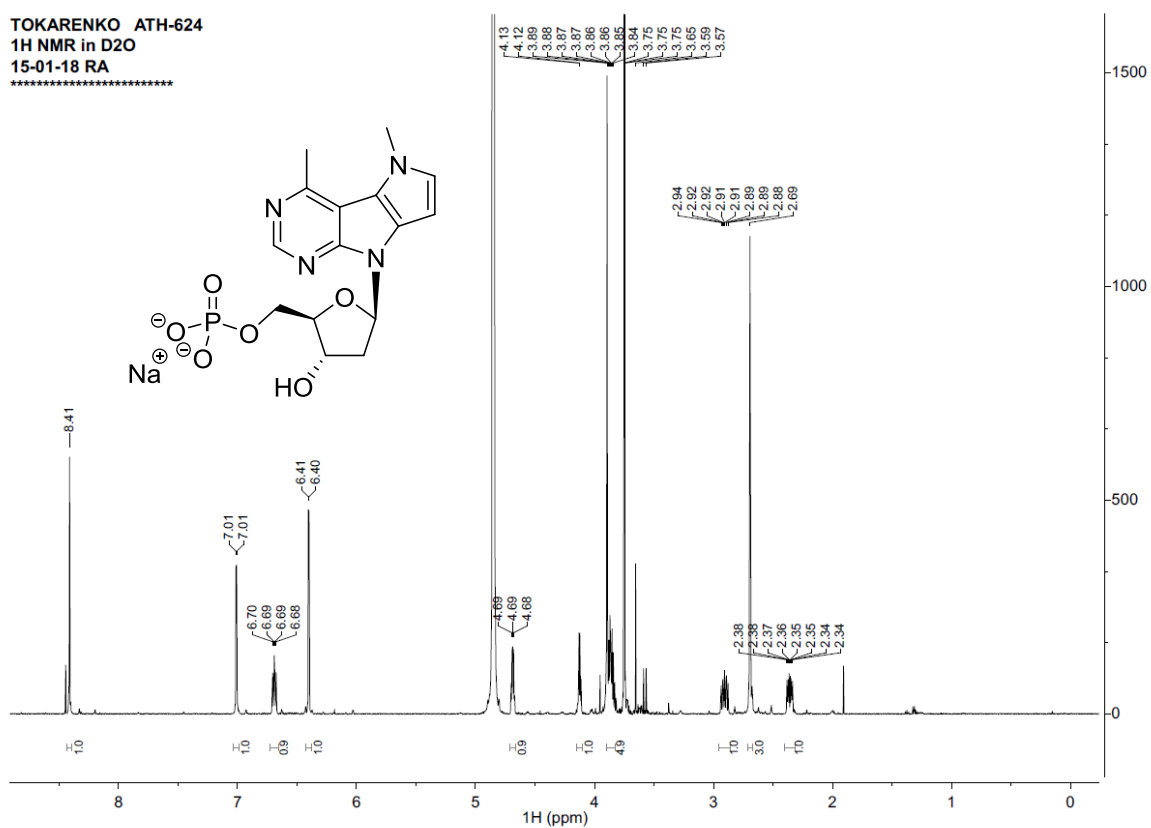

TOKARENKO ATH-624

APT in D<sub>2</sub>O

12-01-18 RA

\*\*\*\*\*

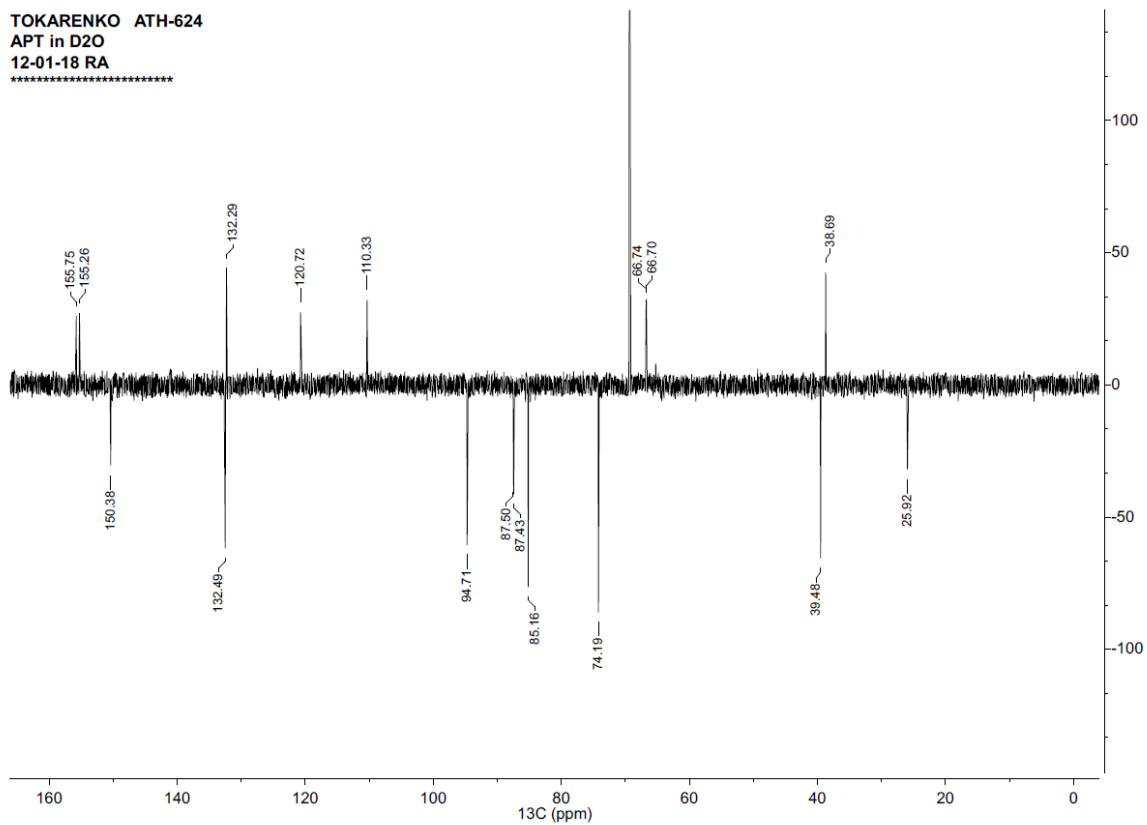

TOKARENKO ATH-624  
31P{1H} NMR in D2O  
12-01-18 RA  
\*\*\*\*\*

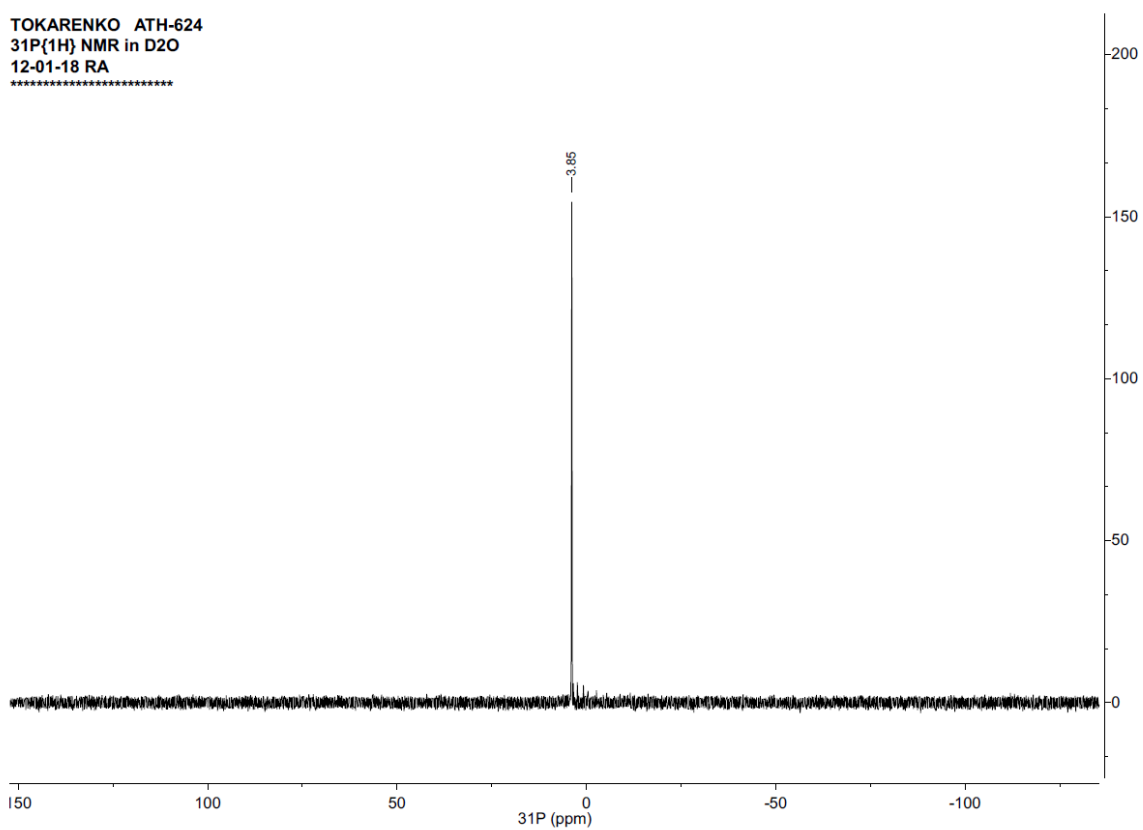

## S75

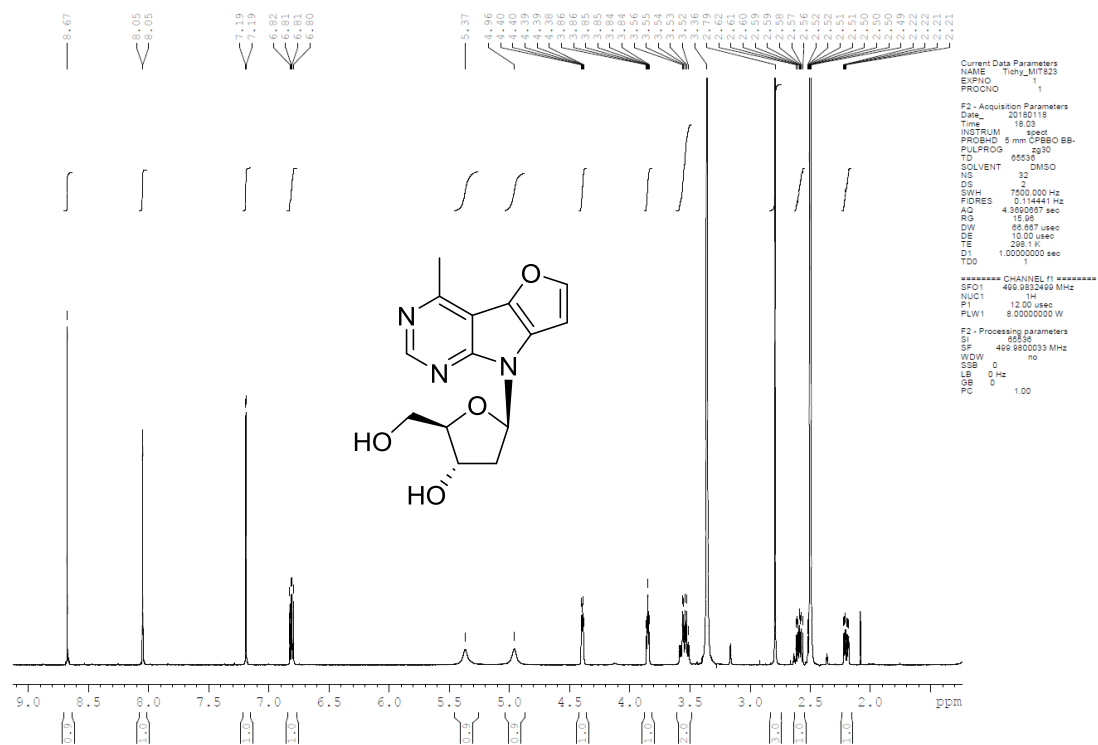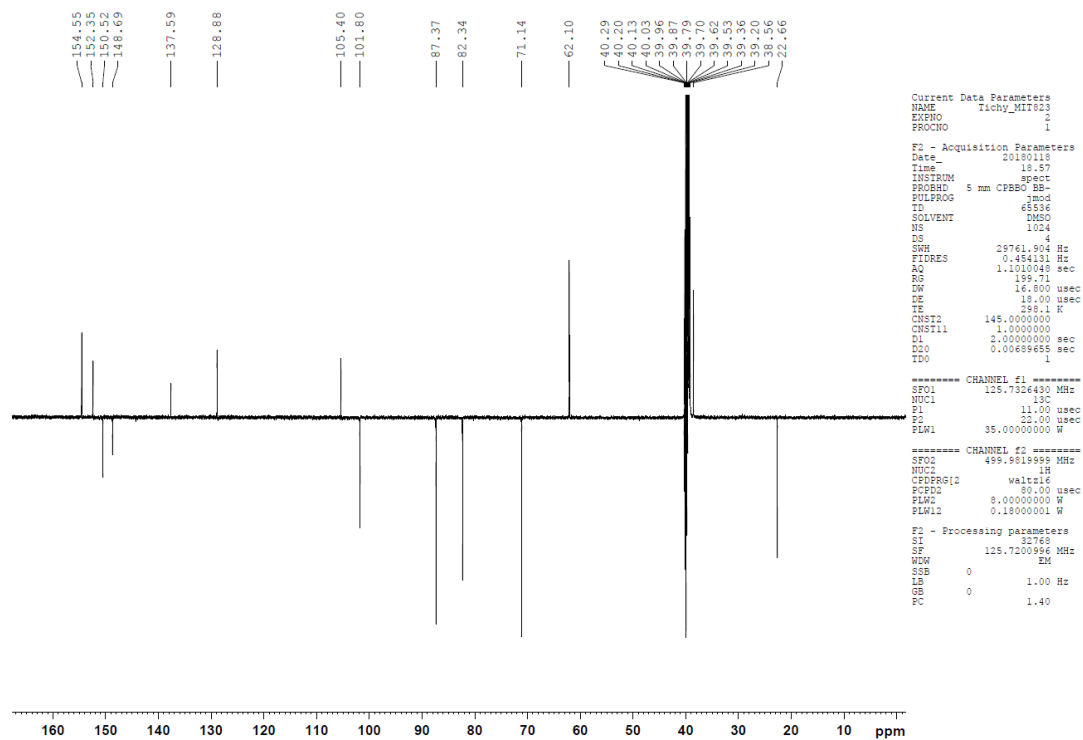

# NMR spectra of compound **32-MP**

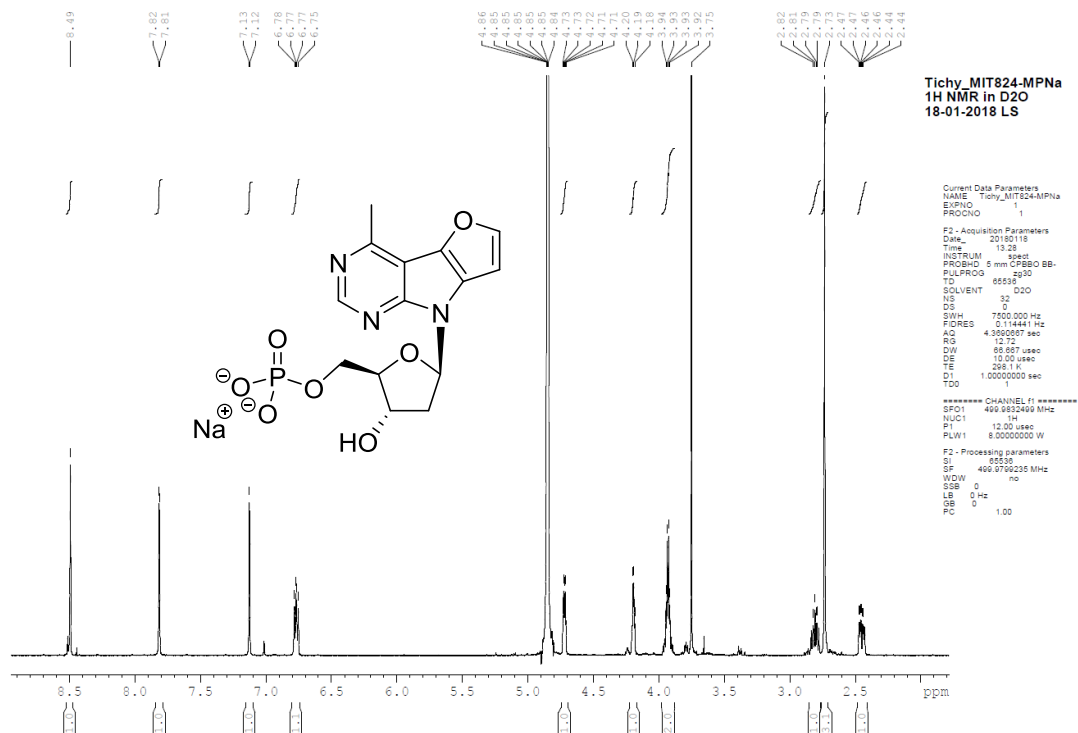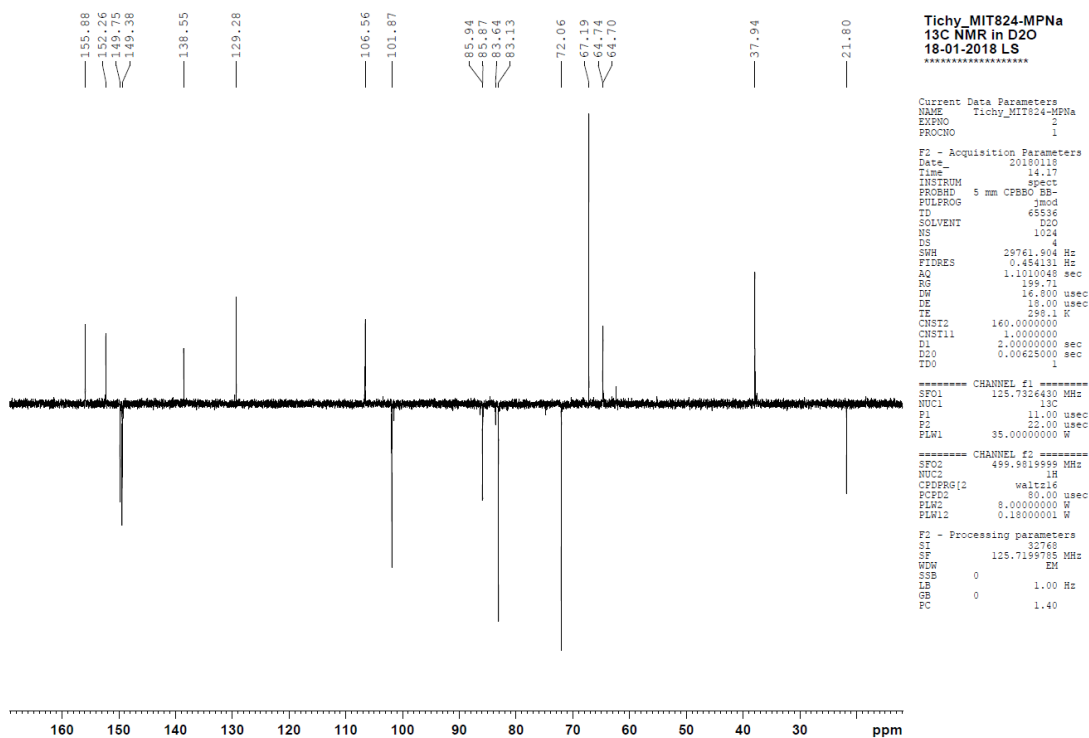

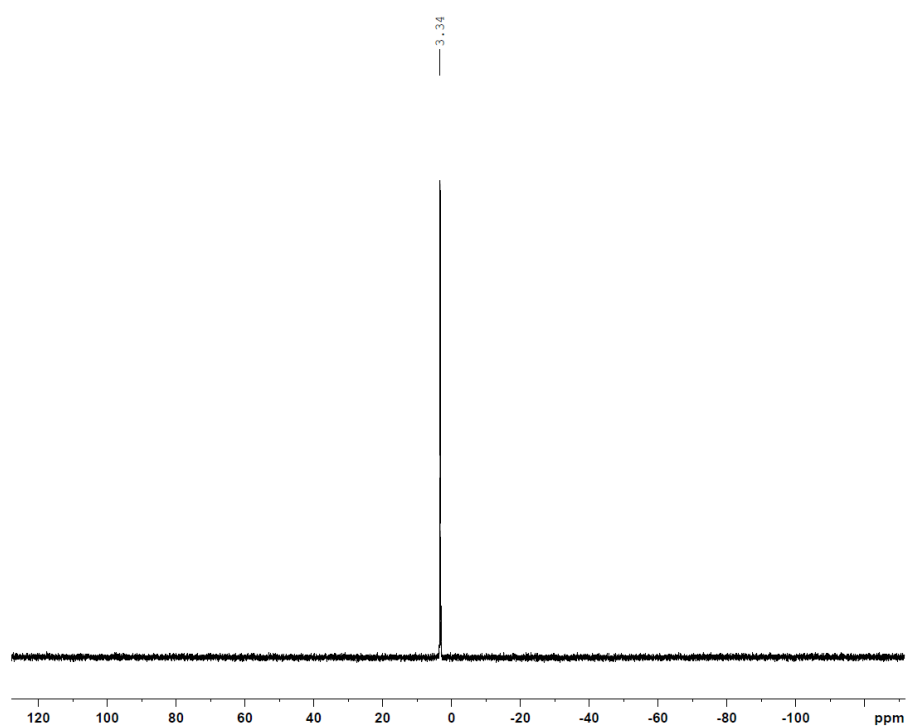

Tichy\_MIT824-MPNa  
 31P(H) in D2O  
 18-01-2018 LS  
 \*\*\*\*\*

Current Data Parameters  
 NAME Tichy\_MIT824-MPNa  
 EXPNO 10  
 PROCNO 1

F2 - Acquisition Parameters  
 Date\_ 20180118  
 Time\_ 15.22  
 INSTRUM spect  
 PROBHD 5 mm CPBBO BB-  
 PULPROG zgpg30  
 TD 65536  
 SOLVENT D2O  
 NS 32  
 DS 0  
 SWH 81521.742 Hz  
 FIDRES 1.248923 Hz  
 AQ 0.4018641 sec  
 RG 199.71  
 DW 6.133 usec  
 DE 23.00 usec  
 TE 298.1 K  
 D1 2.00000000 sec  
 D11 0.03000000 sec  
 TDO 1

===== CHANNEL f1 =====  
 SFO1 202.3854942 MHz  
 NUC1 31P  
 P1 12.00 usec  
 PLW1 29.00000000 W

===== CHANNEL f2 =====  
 SFO2 499.9815659 MHz  
 NUC2 1H  
 CPDPRG2 waltz16  
 P1P2 89.00 usec  
 PLW2 7.40000010 W  
 PLW12 0.13991000 W  
 PLW13 0.07037200 W

F2 - Processing parameters  
 SI 131072  
 SF 202.3954671 MHz  
 WDW EM  
 SSB 0  
 LB 3.00 Hz  
 GB 0  
 PC 1.40
